# Supplementary material for: ‘Green’ synthesis of amines from renewable resources? A detailed analysis of case studies using the CHEM21 green metrics toolkit
Source: Royal Society of Chemistry journal article supplement (doi:10.1039/d5gc00924c), 2025-01-01
Supplement: d5gc00924c1.pdf [file d5gc00924c1.pdf]

## Classical approach: Step 1

Yield, AE, RME, MI/PMI and OE

| Reactant (Limiting Reactant First) | Mass (g)      | MW            | Mol  | Catalyst     | Mass (g)    | Reagent | Mass (g)    | Reaction solvent | Volume (cm <sup>3</sup> ) | Density (g ml <sup>-1</sup> ) | Mass (g)    | Work up chemical | Mass (g)    | Workup solvent | Volume (cm <sup>3</sup> ) | Density (g ml <sup>-1</sup> ) | Mass (g)    |
|------------------------------------|---------------|---------------|------|--------------|-------------|---------|-------------|------------------|---------------------------|-------------------------------|-------------|------------------|-------------|----------------|---------------------------|-------------------------------|-------------|
| benzene                            | 352.00        | 78.11         | 4.51 | Zeolite beta | 0.40        |         |             | N <sub>2</sub>   |                           |                               | 3.39        |                  |             |                |                           |                               | 0.00        |
| propylene                          | 208.00        | 42.08         | 4.94 |              |             |         |             |                  |                           |                               | 0.00        |                  |             |                |                           |                               | 0.00        |
|                                    |               |               |      |              |             |         |             |                  |                           |                               | 0.00        |                  |             |                |                           |                               | 0.00        |
|                                    |               |               |      |              |             |         |             |                  |                           |                               | 0.00        |                  |             |                |                           |                               | 0.00        |
|                                    |               |               |      |              |             |         |             |                  |                           |                               | 0.00        |                  |             |                |                           |                               | 0.00        |
|                                    |               |               |      |              |             |         |             |                  |                           |                               | 0.00        |                  |             |                |                           |                               | 0.00        |
| <b>Total</b>                       | <b>560.00</b> | <b>120.19</b> |      |              | <b>0.40</b> |         | <b>0.00</b> |                  |                           |                               | <b>3.39</b> |                  | <b>0.00</b> |                |                           |                               | <b>0.00</b> |

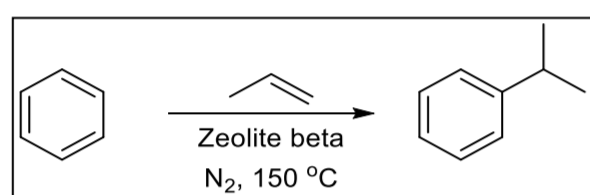

|                                   | Step  | Cumulative |
|-----------------------------------|-------|------------|
| Yield                             | 91.37 | 91.4       |
| Conversion                        | 100.0 | /          |
| Selectivity                       | 91.37 | /          |
| AE                                | 99.92 | 99.9       |
| RME                               | 88.30 | 88.30      |
| PMI total                         | 1.14  | 1.14       |
| PMI Reaction                      | 1.14  | 1.14       |
| PMI reactants, reagents, catalyst | 1.13  | 1.13       |
| PMI reaction solvents             | 0.01  | 0.007      |
| PMI Workup                        | 0.00  | 0.000      |
| PMI Workup chemical               | 0.00  | 0.000      |
| PMI workup solvents               | 0.00  | 0.000      |

| Product                     | Mass   | MW     | Mol  |
|-----------------------------|--------|--------|------|
|                             | 494.49 | 120.09 | 4.12 |
| Unreacted limiting reactant | mass   |        |      |
|                             | 0.00   |        |      |

Solvents (First Pass)

| Preferred solvents                                                                                | water, EtOH, nBuOH, AcOipr, AcOnBu, PhOMe, MeOH, tBuOH, BnOH, ethylene glycol, acetone, MEK, MIBK, AcOEt, sulfolane                                                                     | List solvents below |
|---------------------------------------------------------------------------------------------------|-----------------------------------------------------------------------------------------------------------------------------------------------------------------------------------------|---------------------|
| <b>Problematic solvents:</b> (acceptable only if substitution does not offer advantages)          | DMSO, cyclohexanone, DMPU, AcOH, Ac <sub>2</sub> O, Acetonitrile, AcOMe, THF, heptane, Me-cyclohexane, toluene, xylene, MTBE, cyclohexane, chlorobenzene, formic acid, pyridine, Me-THF |                     |
| <b>Hazardous solvents:</b> These solvents have significant health and/or safety concerns.         | dioxane, pentane, TEA, diisopropyl ether, DME, DCM, DMF, DMA, NMP, methoxyethanol, hexane                                                                                               |                     |
| <b>Highly hazardous solvents:</b> The solvents which are agreed not to be used, even in screening | Et <sub>2</sub> O, Benzene, CCl <sub>4</sub> , chloroform, DCE, nitromethane, CS <sub>2</sub> , HMPA                                                                                    |                     |

**Experimental:**

G. Spano, S. Ramello, G. Girotti, F. Rivetti, A. Carati *Polimeri Europa S.p.A., Italy; Enitecnologie S.p.A.* . 2006, WO2006002805A1.

**5** :Example nr. 5; 0.4 g of beta zeolite prepared according to what is described in example 1, previously dried to 120°C for 16 hours, are charged into an electrically heated autoclave with an internal volume equal to 0.5 litres, equipped with a mechanical stirrer and with all the necessary devices for the feeding of the benzene and propylene reagents. The autoclave is closed, put under vacuum by suction with a pump connected externally, and 352 g of benzene are .but. then charged by suction. The autoclave is pressurized with nitrogen until a pressure of about 6 bar is reached and the heating is initiated to the programmed temperature of 150°C. When the temperature inside the autoclave has stably reached the pre-selected value, 26 g of propylene are rapidly fed, by means of a pressure tank, and the mixture is left to react for a time of exactly 1 hour, calculated starting from the end of the propylene feeding. At the end of the reaction, the product is discharged and analyzed by gas chromatography. The following products are present in the mixture at the end of the reaction: benzene, cumene, C<sub>6</sub> and C<sub>9</sub> oligomers of propylene, diisopropyl benzenes, other diisopropyl benzene isomers (C<sub>6</sub>-phenyl = aromatic products generally indicated with the formula C<sub>12</sub>H<sub>16</sub>) / triisopropyl benzenes, other triisopropyl benzene isomers (C<sub>9</sub>-phenyl = aromatic products generally indicated with the formula C<sub>15</sub>H<sub>24</sub>), polyalkylated products with a molecular weight higher than triisopropyl benzene (heavy polyalkylated products). The propylene conversion proves to be higher than 97.0 percent, the selectivity to mono-alkylated product (cumene) with respect to the converted propylene is equal to 91.3 percent and the selectivity to (cumene + diisopropyl benzenes + triisopropyl benzenes) with respect to the converted propylene is equal to 97.5 percent. The weight ratio, called R, between the sum of (diisopropyl benzenes + triisopropyl benzenes + C<sub>6</sub>-phenyl + C<sub>9</sub>-phenyl + heavy polyalkylated products) and the sum of (cumene + diisopropyl benzenes + triisopropyl benzenes + C<sub>6</sub>-phenyl + C<sub>9</sub>-phenyl + heavy polyalkylated products) proves to be equal to 0.052. This ratio R is a measurement of the total quantity of the polyalkylated by-products alone with respect to the total products and alkylated by-products formed during the reaction.

**With** beta zeolite prepared from tetraethyl ammonium hydroxide, sodium aluminate, aluminum isopropylate and Ludox HS<sub>40</sub>, Time= 1h, T= 150 °C, Product distribution / selectivity

**Patent:** POLIMERI EUROPA S.P.A.; ENITECNOLOGIE S.P.A.; WO2006/2805; (2006); (A1) English  
[View in Reaxys](#)

| Catalyst/enzyme (First Pass)                                                           |            | Tick |
|----------------------------------------------------------------------------------------|------------|------|
| Catalyst or enzyme used, or reaction takes place without <b>any</b> catalyst/reagents. | Green Flag | X    |
| Use of stoichiometric quantities of reagents                                           | Amber Flag |      |
| Use of reagents in excess                                                              | Red Flag   |      |

|                                    |            | Tick |
|------------------------------------|------------|------|
| Facile recovery of catalyst/enzyme | Green Flag |      |
| catalyst/enzyme not recovered      | Amber Flag |      |

#### Critical elements

| Supply remaining | Flag colour | Note element |
|------------------|-------------|--------------|
| 5-50 years       | Red Flag    |              |
| 50-500 years     | Amber Flag  | AI           |
| +500 years       | Green Flag  |              |

| Energy (First Pass)                          |            | Tick |
|----------------------------------------------|------------|------|
| Reaction run between 0 to 70°C               | Green Flag |      |
| Reaction run between -20 to 0 or 70 to 140°C | Amber Flag |      |
| Reaction run below -20 or above 140°C        | Red Flag   | X    |

|                                                          |            | Tick |
|----------------------------------------------------------|------------|------|
| Reaction run at reflux                                   | Red Flag   |      |
| Reaction run 5°C or more below the solvent boiling point | Green Flag |      |

| Batch/flow |            | Tick |
|------------|------------|------|
| Flow       | Green Flag |      |
| Batch      | Amber Flag | X    |

| Work Up                                                                                                                                  |            | List |
|------------------------------------------------------------------------------------------------------------------------------------------|------------|------|
| quenching<br>filtration<br>centrifugation<br>crystallisation                                                                             | Green Flag | X    |
| Low temperature distillation/evaporation/<br>sublimation (< 140 °C at atmospheric<br>solvent exchange, quenching into aqueous<br>solvent | Amber Flag |      |
| chromatography/ion exchange<br>high temperature<br>multiple recrystallisation                                                            | Red Flag   |      |

| Health & safety            |                              |                              |                                                            | List substances and H-codes | List substances and H-codes | List substances and H-codes |
|----------------------------|------------------------------|------------------------------|------------------------------------------------------------|-----------------------------|-----------------------------|-----------------------------|
|                            | Red Flag                     | Amber Flag                   | Green Flag                                                 |                             |                             |                             |
| Highly explosive           | H200, H201, H202, H203       | H205, H220, H224             | If no red or amber flagged H codes present then green flag |                             | Propylene: H220             |                             |
| Explosive thermal runaway  | H230, H240, H250             | H241                         |                                                            |                             |                             |                             |
| Toxic                      | H300, H310, H330             | H301, H311, H331,            |                                                            |                             |                             |                             |
| Long Term toxicity         | H340, H350, H360, H370, H372 | H341, H351, H361, H371, H373 |                                                            |                             | Benzene: H372, H340, H350   |                             |
| Environmental implications | H400, H410, H411, H420       | H401, H412                   |                                                            |                             |                             |                             |

| Use of chemicals of environmental concern                                            |          | List substances of very high concern |
|--------------------------------------------------------------------------------------|----------|--------------------------------------|
| Chemical identified as Substances of Very High Concern by ChemSec which are utilised | Red Flag | Benzene                              |

## Classical approach: Step 2

Yield, AE, RME, MI/PMI and OE

| Reactant (Limiting Reactant First) | Mass (g)        | MW            | Mol      | Catalyst | Mass (g)    | Reagent | Mass (g)    | Reaction solvent | Volume (cm <sup>3</sup> ) | Density (g ml <sup>-1</sup> ) | Mass (g)        | Work up chemical | Mass (g)    | Workup solvent | Volume (cm <sup>3</sup> ) | Density (g ml <sup>-1</sup> ) | Mass (g)    |
|------------------------------------|-----------------|---------------|----------|----------|-------------|---------|-------------|------------------|---------------------------|-------------------------------|-----------------|------------------|-------------|----------------|---------------------------|-------------------------------|-------------|
| cumene                             | 2.68E+07        | 120.09        | 2.23E+05 |          |             |         |             | N2 from air      |                           |                               | 1.57E+07        |                  |             |                |                           |                               | 0.00        |
| O2 from air                        | 5.22E+06        | 31.99         | 1.63E+05 |          |             |         |             |                  |                           |                               | 0.00            |                  |             |                |                           |                               | 0.00        |
|                                    |                 |               |          |          |             |         |             |                  |                           |                               | 0.00            |                  |             |                |                           |                               | 0.00        |
|                                    |                 |               |          |          |             |         |             |                  |                           |                               | 0.00            |                  |             |                |                           |                               | 0.00        |
|                                    |                 |               |          |          |             |         |             |                  |                           |                               | 0.00            |                  |             |                |                           |                               | 0.00        |
|                                    |                 |               |          |          |             |         |             |                  |                           |                               | 0.00            |                  |             |                |                           |                               | 0.00        |
| <b>Total</b>                       | <b>3.20E+07</b> | <b>152.08</b> |          |          | <b>0.00</b> |         | <b>0.00</b> |                  |                           |                               | <b>1.57E+07</b> |                  | <b>0.00</b> |                |                           |                               | <b>0.00</b> |

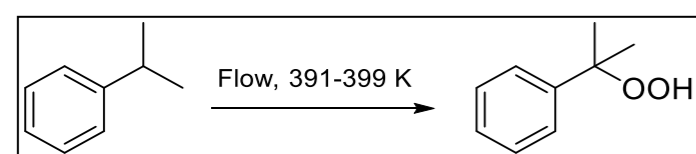

|                                   | Step   | Cumulative |
|-----------------------------------|--------|------------|
| Yield                             | 93.65  | 85.6       |
| Conversion                        | 100.0  | /          |
| Selectivity                       | 93.65  | /          |
| AE                                | 100.00 | 99.9       |
| RME                               | 99.31  | 89.33      |
| PMI total                         | 1.50   | 1.62       |
| PMI Reaction                      | 1.50   | 1.62       |
| PMI reactants, reagents, catalyst | 1.01   | 1.12       |
| PMI reaction solvents             | 0.49   | 0.499      |
| PMI Workup                        | 0.00   | 0.000      |
| PMI Workup chemical               | 0.00   | 0.000      |
| PMI workup solvents               | 0.00   | 0.000      |

| Product                     | Mass     | MW     | Mol      |
|-----------------------------|----------|--------|----------|
|                             | 3.18E+07 | 152.08 | 2.09E+05 |
| Unreacted limiting reactant | mass     |        |          |
|                             | 0.00     |        |          |

### Experimental:

H. Bartkowiak, B. Haase, R. Hofmann, H. J. Naumann, B. Raue VEB Leuna-Werke "Walter Ulbricht", Ger. Dem. Rep. 1988, DD258531A3.

### Beispiel 1

Die Oxidation des Cumens zu Cumenhydroperoxid erfolgt in einem stehenden 62 m<sup>3</sup> großen Reaktor, der durch Siebbodenelemente in vier Reaktionsabschnitte geteilt ist, deren Reaktionsvolumen von oben nach unten 21, 21, 13 und 7 m<sup>3</sup> beinhalten. Dem Reaktor werden stündlich 26 770 kg Cumene mit einer Temperatur von 388 K, das 1,8 Ma.-% Cumenhydroperoxid enthält, zugeführt. Unten werden 4 330 kg/h Luft mit einer Temperatur von 298 K in den Reaktor eingeleitet. Oben verlassen den Reaktor 7 100 kg/h Abgas, bestehend aus Stickstoff, Sauerstoff, Cumene und Cumenhydroperoxid mit einer Temperatur von 398 K. Mittels eines Kühlkreislaufes werden die Temperaturen in den einzelnen Reaktionsstufen zwischen 399 K oben und 391 K unten gehalten. Den Reaktor verlassen 24 000 kg/h Oxidat mit einer Temperatur von 386 K und einem Gehalt an Cumenhydroperoxid von 19,4 Ma.-%. Das im Abgas enthaltene Cumene und Cumenhydroperoxid wird mittels Kühlwasser auskondensiert. Gleichfalls mittels Kühlwasser wird dem Kühlkreislauf die im Reaktor aufgenommene Wärme entzogen. Die Erwärmung des Cumens auf die Eintrittstemperatur von 388 K erfolgt zunächst in einem Wärmeaustauschapparat mittels des den Reaktor verlassenden Oxidats, wobei sich das Cumene von 303 K auf 349 K erwärmt und dann in einem weiteren Wärmeaustauscher mittels Heizdampf. Das Oxidat wird dabei innerhalb von 15 Minuten auf eine Temperatur von 346 K abgekühlt und gelangt danach in eine unterteilte, bei Drücken von 4 kPa und 1 kPa arbeitende Verdampferstufe, in der das Oxidat auf 89 Ma.-% Cumenhydroperoxid aufkonzentriert wird. Die Ausbeute an nutzbarem Cumenhydroperoxid beträgt bezüglich Cumene 93,7 Ma.-%. Der Verbrauch an Heizdampf zur Erzeugung des 89%igen Cumenhydroperoxids beträgt 4 970 kg/h.

### Solvents (First Pass)

| Preferred solvents                                                                                | water, EtOH, nBuOH, AcOipr, AcOnBu, PhOMe, MeOH, tBuOH, BnOH, ethylene glycol, acetone, MEK, MIBK, AcOEt, sulfolane                                                        | List solvents below |
|---------------------------------------------------------------------------------------------------|----------------------------------------------------------------------------------------------------------------------------------------------------------------------------|---------------------|
| <b>Problematic solvents:</b> (acceptable only if substitution does not offer advantages)          | DMSO, cyclohexanone, DMPU, AcOH, Ac2O, Acetonitrile, AcOMe, THF, heptane, Me-cyclohexane, toluene, xylene, MTBE, cyclohexane, chlorobenzene, formic acid, pyridine, Me-THF |                     |
| <b>Hazardous solvents:</b> These solvents have significant health and/or safety concerns.         | dioxane, pentane, TEA, diisopropyl ether, DME, DCM, DMF, DMA, NMP, methoxyethanol, hexane                                                                                  |                     |
| <b>Highly hazardous solvents:</b> The solvents which are agreed not to be used, even in screening | Et <sub>2</sub> O, Benzene, CCl <sub>4</sub> , chloroform, DCE, nitromethane, CS <sub>2</sub> , HMPA                                                                       |                     |

### Catalyst/enzyme (First Pass)

|                                                                                 | Green Flag | Amber Flag | Red Flag | Tick |
|---------------------------------------------------------------------------------|------------|------------|----------|------|
| Catalyst or enzyme used, or reaction takes place without any catalyst/reagents. | Green Flag |            |          | X    |
| Use of stoichiometric quantities of reagents                                    | Amber Flag |            |          |      |
| Use of reagents in excess                                                       | Red Flag   |            |          |      |

|                                    | Green Flag | Amber Flag | Tick |
|------------------------------------|------------|------------|------|
| Facile recovery of catalyst/enzyme | Green Flag |            |      |
| catalyst/enzyme not recovered      | Amber Flag |            |      |

**Critical elements**

| Supply remaining | Flag colour | Note element |
|------------------|-------------|--------------|
| 5-50 years       | Red Flag    |              |
| 50-500 years     | Amber Flag  |              |
| +500 years       | Green Flag  | X            |

| Energy (First Pass)                          |            | Tick |
|----------------------------------------------|------------|------|
| Reaction run between 0 to 70°C               | Green Flag |      |
| Reaction run between -20 to 0 or 70 to 140°C | Amber Flag | X    |
| Reaction run below -20 or above 140°C        | Red Flag   |      |

| Batch/flow |            | Tick |
|------------|------------|------|
| Flow       | Green Flag | X    |
| Batch      | Amber Flag |      |

|                                                          |            | Tick |
|----------------------------------------------------------|------------|------|
| Reaction run at reflux                                   | Red Flag   |      |
| Reaction run 5°C or more below the solvent boiling point | Green Flag |      |

| Work Up                                                                                                                                  |            | List |
|------------------------------------------------------------------------------------------------------------------------------------------|------------|------|
| quenching<br>filtration<br>centrifugation<br>crystallisation                                                                             | Green Flag | X    |
| Low temperature distillation/evaporation/<br>sublimation (< 140 °C at atmospheric<br>solvent exchange, quenching into aqueous<br>solvent | Amber Flag |      |
| chromatography/ion exchange<br>high temperature<br>multiple recrystallisation                                                            | Red Flag   |      |

| Health & safety                   | Red Flag                     | Amber Flag                   | Green Flag                                                 | List substances and H-codes | List substances and H-codes | List substances and H-codes |
|-----------------------------------|------------------------------|------------------------------|------------------------------------------------------------|-----------------------------|-----------------------------|-----------------------------|
| <b>Highly explosive</b>           | H200, H201, H202, H203       | H205, H220, H224             | If no red or amber flagged H codes present then green flag |                             |                             |                             |
| <b>Explosive thermal runaway</b>  | H230, H240, H250             | H241                         |                                                            |                             |                             |                             |
| <b>Toxic</b>                      | H300, H310, H330             | H301, H311, H331,            |                                                            |                             |                             |                             |
| <b>Long Term toxicity</b>         | H340, H350, H360, H370, H372 | H341, H351, H361, H371, H373 |                                                            |                             |                             |                             |
| <b>Environmental implications</b> | H400, H410, H411, H420       | H401, H412                   |                                                            |                             | Cumene (H411)               |                             |

| Use of chemicals of environmental concern                                            |          | List substances of very high concern |
|--------------------------------------------------------------------------------------|----------|--------------------------------------|
| Chemical identified as Substances of Very High Concern by ChemSec which are utilised | Red Flag |                                      |

## Classical approach: Step 3

Yield, AE, RME, MI/PMI and OE

| Reactant (Limiting Reactant First) | Mass (g)     | MW            | Mol      | Catalyst          | Mass (g)    | Reagent | Mass (g)    | Reaction solvent | Volume (cm <sup>3</sup> ) | Density (g ml <sup>-1</sup> ) | Mass (g)      | Work up chemical | Mass (g)    | Workup solvent | Volume (cm <sup>3</sup> ) | Density (g ml <sup>-1</sup> ) | Mass (g) |             |
|------------------------------------|--------------|---------------|----------|-------------------|-------------|---------|-------------|------------------|---------------------------|-------------------------------|---------------|------------------|-------------|----------------|---------------------------|-------------------------------|----------|-------------|
| Cumene hydroperoxide               | 15.20        | 152.08        | 9.99E-02 | HClO <sub>4</sub> | 0.74        |         |             | HOAc             | 100.00                    | 1.05                          | 105.00        |                  |             |                |                           |                               |          | 0.00        |
|                                    |              |               |          |                   |             |         |             | HOAc             | 0.10                      | 1.05                          | 0.11          |                  |             |                |                           |                               |          | 0.00        |
|                                    |              |               |          |                   |             |         |             |                  |                           |                               | 0.00          |                  |             |                |                           |                               |          | 0.00        |
|                                    |              |               |          |                   |             |         |             |                  |                           |                               | 0.00          |                  |             |                |                           |                               |          | 0.00        |
|                                    |              |               |          |                   |             |         |             |                  |                           |                               | 0.00          |                  |             |                |                           |                               |          | 0.00        |
|                                    |              |               |          |                   |             |         |             |                  |                           |                               | 0.00          |                  |             |                |                           |                               |          | 0.00        |
| <b>Total</b>                       | <b>15.20</b> | <b>152.08</b> |          |                   | <b>0.74</b> |         | <b>0.00</b> |                  |                           |                               | <b>105.11</b> |                  | <b>0.00</b> |                |                           |                               |          | <b>0.00</b> |

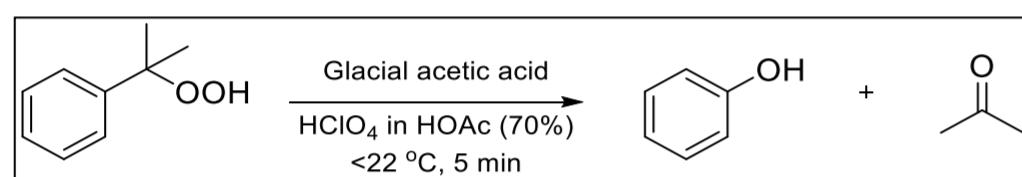

|                                   | Step  | Cumulative |
|-----------------------------------|-------|------------|
| Yield                             | 95.65 | 81.8       |
| Conversion                        | 100.0 | /          |
| Selectivity                       | 95.65 | /          |
| AE                                | 61.88 | 61.8       |
| RME                               | 59.21 | 52.89      |
| PMI total                         | 13.45 | 14.49      |
| PMI Reaction                      | 13.45 | 14.49      |
| PMI reactants, reagents, catalyst | 1.77  | 1.97       |
| PMI reaction solvents             | 11.68 | 12.522     |
| PMI Workup                        | 0.00  | 0.000      |
| PMI Workup chemical               | 0.00  | 0.000      |
| PMI workup solvents               | 0.00  | 0.000      |

| Product                     | Mass | MW    | Mol  |
|-----------------------------|------|-------|------|
|                             | 9.00 | 94.11 | 0.10 |
| Unreacted limiting reactant | 0.00 |       |      |

### Experimental:

M. S. Kharasch, A. Fono, W. Nudenberg *J. Org. Chem.* **1950**, *15*, 748.

*Decomposition of  $\alpha$ -cumyl hydroperoxide in the presence of acetic acid and catalytic quantities of perchloric acid.*  $\alpha$ -Cumyl hydroperoxide (15.2 g., 0.1 mole), dissolved in 100 cc. of glacial acetic acid was treated with 0.1 cc. of a 5% solution of 70% perchloric acid in acetic acid. The temperature of the reaction mixture was kept below 22°. The peroxide titre of the mixture fell to zero after 5 minutes. Phenol (9 g., 95% yield) was isolated in crystalline form. Acetone was identified and estimated by means of its dinitrophenylhydrazone. An unidentified neutral oil (amounting to less than 3% of the starting material) was also obtained.

### Solvents (First Pass)

|                                                                                                   |                                                                                                                                                                                         | List solvents below |
|---------------------------------------------------------------------------------------------------|-----------------------------------------------------------------------------------------------------------------------------------------------------------------------------------------|---------------------|
| <b>Preferred solvents</b>                                                                         | water, EtOH, nBuOH, AcOipr, AcOnBu, PhOMe, MeOH, tBuOH, BnOH, ethylene glycol, acetone, MEK, MIBK, AcOEt, sulfolane                                                                     |                     |
| <b>Problematic solvents:</b> (acceptable only if substitution does not offer advantages)          | DMSO, cyclohexanone, DMPU, AcOH, Ac <sub>2</sub> O, Acetonitrile, AcOMe, THF, heptane, Me-cyclohexane, toluene, xylene, MTBE, cyclohexane, chlorobenzene, formic acid, pyridine, Me-THF | HOAc                |
| <b>Hazardous solvents:</b> These solvents have significant health and/or safety concerns.         | dioxane, pentane, TEA, diisopropyl ether, DME, DCM, DMF, DMA, NMP, methoxyethanol, hexane                                                                                               |                     |
| <b>Highly hazardous solvents:</b> The solvents which are agreed not to be used, even in screening | Et <sub>2</sub> O, Benzene, CCl <sub>4</sub> , chloroform, DCE, nitromethane, CS <sub>2</sub> , HMPA                                                                                    |                     |

### Catalyst/enzyme (First Pass)

|                                                                                        |            | Tick |
|----------------------------------------------------------------------------------------|------------|------|
| Catalyst or enzyme used, or reaction takes place without <b>any</b> catalyst/reagents. | Green Flag | X    |
| Use of stoichiometric quantities of reagents                                           | Amber Flag |      |
| Use of reagents in excess                                                              | Red Flag   |      |

|                                    |            | Tick |
|------------------------------------|------------|------|
| Facile recovery of catalyst/enzyme | Green Flag |      |
| catalyst/enzyme not recovered      | Amber Flag | X    |

**Critical elements**

| Supply remaining | Flag colour | Note element |
|------------------|-------------|--------------|
| 5-50 years       | Red Flag    |              |
| 50-500 years     | Amber Flag  |              |
| +500 years       | Green Flag  | X            |

| Energy (First Pass)                          |            | Tick |
|----------------------------------------------|------------|------|
| Reaction run between 0 to 70°C               | Green Flag | X    |
| Reaction run between -20 to 0 or 70 to 140°C | Amber Flag |      |
| Reaction run below -20 or above 140°C        | Red Flag   |      |

| Batch/flow |            | Tick |
|------------|------------|------|
| Flow       | Green Flag |      |
| Batch      | Amber Flag | X    |

|                                                          |            | Tick |
|----------------------------------------------------------|------------|------|
| Reaction run at reflux                                   | Red Flag   |      |
| Reaction run 5°C or more below the solvent boiling point | Green Flag | X    |

| Work Up                                                                                                                                  |            | List |
|------------------------------------------------------------------------------------------------------------------------------------------|------------|------|
| quenching<br>filtration<br>centrifugation<br>crystallisation                                                                             | Green Flag | X    |
| Low temperature distillation/evaporation/<br>sublimation (< 140 °C at atmospheric<br>solvent exchange, quenching into aqueous<br>solvent | Amber Flag |      |
| chromatography/ion exchange<br>high temperature<br>multiple recrystallisation                                                            | Red Flag   |      |

| Health & safety            |                              |                              |                                                            | List substances and H-codes | List substances and H-codes | List substances and H-codes |
|----------------------------|------------------------------|------------------------------|------------------------------------------------------------|-----------------------------|-----------------------------|-----------------------------|
|                            | Red Flag                     | Amber Flag                   | Green Flag                                                 |                             |                             |                             |
| Highly explosive           | H200, H201, H202, H203       | H205, H220, H224             | If no red or amber flagged H codes present then green flag |                             |                             |                             |
| Explosive thermal runaway  | H230, H240, H250             | H241                         |                                                            |                             |                             | HClO <sub>4</sub> , HOAc    |
| Toxic                      | H300, H310, H330             | H301, H311, H331,            |                                                            |                             |                             |                             |
| Long Term toxicity         | H340, H350, H360, H370, H372 | H341, H351, H361, H371, H373 |                                                            |                             |                             |                             |
| Environmental implications | H400, H410, H411, H420       | H401, H412                   |                                                            |                             |                             |                             |

| Use of chemicals of environmental concern                                            |          | List substances of very high concern |
|--------------------------------------------------------------------------------------|----------|--------------------------------------|
| Chemical identified as Substances of Very High Concern by ChemSec which are utilised | Red Flag |                                      |

## Classical approach: Step 4

Yield, AE, RME, MI/PMI and OE

| Reactant (Limiting Reactant First) | Mass (g)      | MW            | Mol  | Catalyst | Mass (g)    | Reagent | Mass (g)    | Reaction solvent | Volume (cm <sup>3</sup> ) | Density (g ml <sup>-1</sup> ) | Mass (g)     | Work up chemical | Mass (g)    | Workup solvent | Volume (cm <sup>3</sup> ) | Density (g ml <sup>-1</sup> ) | Mass (g)    |
|------------------------------------|---------------|---------------|------|----------|-------------|---------|-------------|------------------|---------------------------|-------------------------------|--------------|------------------|-------------|----------------|---------------------------|-------------------------------|-------------|
| Phenol                             | 90.00         | 94.11         | 0.96 | H2SO4    | 0.10        |         |             | H2O (H2O2)       | 22.32                     | 1.00                          | 22.32        | NaOH             | 0.08        | H2O (NaOH)     | 0.08                      | 1.00                          | 0.08        |
| H2O2                               | 33.48         | 34.01         | 0.98 | MIBK     | 4.60        |         |             | H2O (H2SO4)      | 0.00                      | 1.00                          | 0.00         |                  |             |                |                           |                               | 0.00        |
|                                    |               |               |      |          |             |         |             |                  |                           |                               | 0.00         |                  |             |                |                           |                               | 0.00        |
|                                    |               |               |      |          |             |         |             |                  |                           |                               | 0.00         |                  |             |                |                           |                               | 0.00        |
|                                    |               |               |      |          |             |         |             |                  |                           |                               | 0.00         |                  |             |                |                           |                               | 0.00        |
|                                    |               |               |      |          |             |         |             |                  |                           |                               | 0.00         |                  |             |                |                           |                               | 0.00        |
| <b>Total</b>                       | <b>123.48</b> | <b>128.12</b> |      |          | <b>4.70</b> |         | <b>0.00</b> |                  |                           |                               | <b>22.32</b> |                  | <b>0.08</b> |                |                           |                               | <b>0.08</b> |

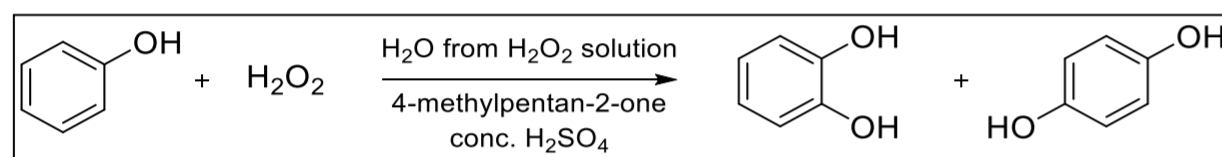

|                                   | Step  | Cumulative |
|-----------------------------------|-------|------------|
| Yield                             | 53.95 | 44.2       |
| Conversion                        | 100.0 | /          |
| Selectivity                       | 53.95 | /          |
| AE                                | 85.94 | 59.1       |
| RME                               | 46.00 | 27.89      |
| PMI total                         | 2.65  | 24.03      |
| PMI Reaction                      | 2.65  | 24.03      |
| PMI reactants, reagents, catalyst | 2.26  | 3.80       |
| PMI reaction solvents             | 0.39  | 20.234     |
| PMI Workup chemical               | 0.00  | 0.003      |
| PMI Workup solvents               | 0.00  | 0.001      |

|                             | Mass  | MW     | Mol  |
|-----------------------------|-------|--------|------|
| Product                     | 56.80 | 110.10 | 0.52 |
| Unreacted limiting reactant | 0.00  |        |      |

Solvents (First Pass)

| Preferred solvents                                                                         | water, EtOH, nBuOH, AcOipr, AcOnBu, PhOMe, MeOH, tBuOH, BnOH, ethylene glycol, acetone, MEK, MIBK, AcOEt, sulfolane                                                        | List solvents below |
|--------------------------------------------------------------------------------------------|----------------------------------------------------------------------------------------------------------------------------------------------------------------------------|---------------------|
| Problematic solvents: (acceptable only if substitution does not offer advantages)          | DMSO, cyclohexanone, DMPU, AcOH, Ac2O, Acetonitrile, AcOMe, THF, heptane, Me-cyclohexane, toluene, xylene, MTBE, cyclohexane, chlorobenzene, formic acid, pyridine, Me-THF | H2O                 |
| Hazardous solvents: These solvents have significant health and/or safety concerns.         | dioxane, pentane, TEA, diisopropyl ether, DME, DCM, DMF, DMA, NMP, methoxyethanol, hexane                                                                                  |                     |
| Highly hazardous solvents: The solvents which are agreed not to be used, even in screening | Et <sub>2</sub> O, Benzene, CCl <sub>4</sub> , chloroform, DCE, nitromethane, CS <sub>2</sub> , HMPA                                                                       |                     |

Experimental:

S. Umemura, N. Takamitsu, T. Hamamoto, N. Kuroda *Ube Industries Ltd 1978*, US4078006A.

### EXAMPLE 37

In the same reaction vessel as in Example 34, 1852 g. of phenol (19.68), 4.6 g. of 4-methyl-2-pentanone (0.046), 55.8 g. of 60 percent hydrogen peroxide (0.985 mole), and 0.10 g. of concentrated sulfuric acid were placed. The mixture was stirred at 50° C. in an oil bath for 10 minutes. After neutralization of sulfuric acid by adding 0.16 g. of 50 percent aqueous sodium hydroxide, the mixture was subjected to distillation under reduced pressure to fraction water, 3.7 g. of 4-methyl-2-pentanone, 1762 g. of phenol (18.72 moles), 56.8 g. of catechol (0.516 mole) and 38.5 g. of hydroquinone (0.350 mole). The total yield of the dihydric phenols based on hydrogen peroxide was 88.0 percent, and that based on phenol was 90.2 percent.

| Catalyst/enzyme (First Pass)                                                           |            | Tick |
|----------------------------------------------------------------------------------------|------------|------|
| Catalyst or enzyme used, or reaction takes place without <b>any</b> catalyst/reagents. | Green Flag | X    |
| Use of stoichiometric quantities of reagents                                           | Amber Flag |      |
| Use of reagents in excess                                                              | Red Flag   |      |

|                                    |            | Tick |
|------------------------------------|------------|------|
| Facile recovery of catalyst/enzyme | Green Flag |      |
| catalyst/enzyme not recovered      | Amber Flag | X    |

#### Critical elements

| Supply remaining | Flag colour | Note element |
|------------------|-------------|--------------|
| 5-50 years       | Red Flag    |              |
| 50-500 years     | Amber Flag  | S            |
| +500 years       | Green Flag  |              |

| Energy (First Pass)                          |            | Tick |
|----------------------------------------------|------------|------|
| Reaction run between 0 to 70°C               | Green Flag |      |
| Reaction run between -20 to 0 or 70 to 140°C | Amber Flag | X    |
| Reaction run below -20 or above 140°C        | Red Flag   |      |

|                                                          |            | Tick |
|----------------------------------------------------------|------------|------|
| Reaction run at reflux                                   | Red Flag   | X    |
| Reaction run 5°C or more below the solvent boiling point | Green Flag |      |

| Batch/flow |            | Tick |
|------------|------------|------|
| Flow       | Green Flag |      |
| Batch      | Amber Flag | X    |

| Work Up                                                                                                                                  |            | List |
|------------------------------------------------------------------------------------------------------------------------------------------|------------|------|
| quenching<br>filtration<br>centrifugation<br>crystallisation                                                                             | Green Flag | X    |
| Low temperature distillation/evaporation/<br>sublimation (< 140 °C at atmospheric<br>solvent exchange, quenching into aqueous<br>solvent | Amber Flag |      |
| chromatography/ion exchange<br>high temperature<br>multiple recrystallisation                                                            | Red Flag   |      |

| Health & safety            |                              |                              |                                                            | List substances and H-codes | List substances and H-codes | List substances and H-codes |
|----------------------------|------------------------------|------------------------------|------------------------------------------------------------|-----------------------------|-----------------------------|-----------------------------|
|                            | Red Flag                     | Amber Flag                   | Green Flag                                                 |                             |                             |                             |
| Highly explosive           | H200, H201, H202, H203       | H205, H220, H224             | If no red or amber flagged H codes present then green flag |                             |                             | H202, H20, MIBK, KHSO4      |
| Explosive thermal runaway  | H230, H240, H250             | H241                         |                                                            |                             |                             |                             |
| Toxic                      | H300, H310, H330             | H301, H311, H331,            |                                                            |                             |                             |                             |
| Long Term toxicity         | H340, H350, H360, H370, H372 | H341, H351, H361, H371, H373 |                                                            |                             |                             |                             |
| Environmental implications | H400, H410, H411, H420       | H401, H412                   |                                                            |                             |                             |                             |

| Use of chemicals of environmental concern                                            | List substances of very high concern |  |
|--------------------------------------------------------------------------------------|--------------------------------------|--|
| Chemical identified as Substances of Very High Concern by ChemSec which are utilised | Red Flag                             |  |



## Classical approach: Step 5

Yield, AE, RME, MI/PMI and OE

| Reactant (Limiting Reactant First) | Mass (g)    | MW            | Mol   | Catalyst                       | Mass (g)    | Reagent | Mass (g)    | Reaction solvent                  | Volume (cm <sup>3</sup> ) | Density (g ml <sup>-1</sup> ) | Mass (g)     | Work up chemical | Mass (g)    | Workup solvent          | Volume (cm <sup>3</sup> ) | Density (g ml <sup>-1</sup> ) | Mass (g)      |
|------------------------------------|-------------|---------------|-------|--------------------------------|-------------|---------|-------------|-----------------------------------|---------------------------|-------------------------------|--------------|------------------|-------------|-------------------------|---------------------------|-------------------------------|---------------|
| Catechol                           | 5.00        | 110.10        | 45.41 | Al <sub>2</sub> O <sub>3</sub> | 2.04        | NaOH    | 3.21        | H <sub>2</sub> O (NaOH)           | 55.00                     | 1.00                          | 55.00        | NaOH             | 0.80        | H <sub>2</sub> O (NaOH) | 20.00                     | 1.00                          | 20.00         |
| glyoxylic acid                     | 3.55        | 74.04         | 47.95 |                                |             |         |             | H <sub>2</sub> O (glyoxylic acid) | 3.55                      | 1.00                          | 3.55         | HCl              | 3.50        | H <sub>2</sub> O (HCl)  | 8.00                      | 1.00                          | 8.00          |
|                                    |             |               |       |                                |             |         |             |                                   |                           |                               | 0.00         |                  |             | EtOAc                   | 90.00                     | 0.90                          | 81.18         |
|                                    |             |               |       |                                |             |         |             |                                   |                           |                               | 0.00         |                  |             |                         |                           |                               | 0.00          |
|                                    |             |               |       |                                |             |         |             |                                   |                           |                               | 0.00         |                  |             |                         |                           |                               | 0.00          |
|                                    |             |               |       |                                |             |         |             |                                   |                           |                               | 0.00         |                  |             |                         |                           |                               | 0.00          |
|                                    |             |               |       |                                |             |         |             |                                   |                           |                               | 0.00         |                  |             |                         |                           |                               | 0.00          |
| <b>Total</b>                       | <b>8.55</b> | <b>184.14</b> |       |                                | <b>2.04</b> |         | <b>3.21</b> |                                   |                           |                               | <b>58.55</b> |                  | <b>4.30</b> |                         |                           |                               | <b>109.18</b> |

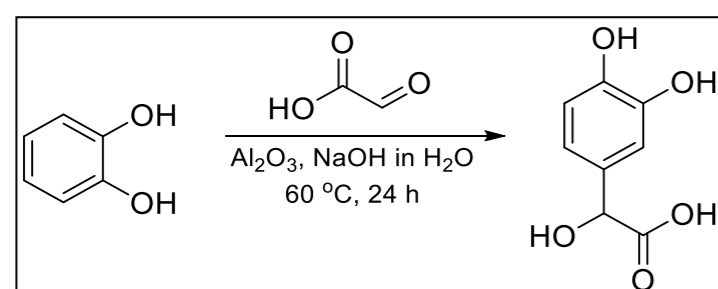

|                                   | Step   | Cumulative |
|-----------------------------------|--------|------------|
| Yield                             | 61.83  | 27.3       |
| Conversion                        | 76.0   | /          |
| Selectivity                       | 81.36  | /          |
| AE                                | 100.00 | 70.8       |
| RME                               | 59.65  | 23.75      |
| PMI total                         | 36.44  | 59.02      |
| PMI Reaction                      | 14.19  | 36.77      |
| PMI reactants, reagents, catalyst | 2.71   | 5.45       |
| PMI reaction solvents             | 11.48  | 31.318     |
| PMI Workup                        | 22.25  | 22.254     |
| PMI Workup chemical               | 0.84   | 0.845      |
| PMI workup solvents               | 21.41  | 21.409     |

| Product                     | Mass | MW     | Mol   |
|-----------------------------|------|--------|-------|
|                             | 5.10 | 184.14 | 28.08 |
| Unreacted limiting reactant | mass |        |       |
|                             | 1.20 |        |       |

**Experimental:** *Org. Process Res. Dev.* **2000**, *4*, 534–543.

Catechol (5.00 g, 45.41 mmol) was dissolved in aqueous NaOH (3.21 g, 80.3 mmol in 55.0 mL of water) followed by addition of Al<sub>2</sub>O<sub>3</sub> (2.04 g, 20 mmol). After 5 min glyoxylic acid (7.10 g of 50% aqueous solution, 48.0 mmol) was added to the reaction mixture, and the mixture was heated at 60 °C for 24 h under vigorous stirring. The reaction mixture was then allowed to precipitate for 10 min. and filtered to remove Al<sub>2</sub>O<sub>3</sub>. The obtained filter cake was washed with 1 M NaOH (20 mL). The basic washing water was combined with the water solution, and this was acidified to pH 3-4 with 6.0 mL of 37% HCl and extracted with ethyl acetate to recover the unreacted catechol (1.2 g). The aqueous solution was further acidified to pH 1 by 2 mL of concentrated HCl and extracted with ethyl acetate to isolate the mandelic acid derivative (5.1 g, 28.08 mmol).

Solvents (First Pass)

| Preferred solvents                                                                         | water, EtOH, nBuOH, AcOipr, AcOnBu, PhOMe, MeOH, tBuOH, BnOH, ethylene glycol, acetone, MEK, MIBK, AcOEt, sulfolane                                                                     | List solvents below     |
|--------------------------------------------------------------------------------------------|-----------------------------------------------------------------------------------------------------------------------------------------------------------------------------------------|-------------------------|
| Problematic solvents: (acceptable only if substitution does not offer advantages)          | DMSO, cyclohexanone, DMPU, AcOH, Ac <sub>2</sub> O, Acetonitrile, AcOMe, THF, heptane, Me-cyclohexane, toluene, xylene, MTBE, cyclohexane, chlorobenzene, formic acid, pyridine, Me-THF | EtOAc, H <sub>2</sub> O |
| Hazardous solvents: These solvents have significant health and/or safety concerns.         | dioxane, pentane, TEA, diisopropyl ether, DME, DCM, DMF, DMA, NMP, methoxyethanol, hexane                                                                                               |                         |
| Highly hazardous solvents: The solvents which are agreed not to be used, even in screening | Et <sub>2</sub> O, Benzene, CCl <sub>4</sub> , chloroform, DCE, nitromethane, CS <sub>2</sub> , HMPA                                                                                    |                         |

Catalyst/enzyme (First Pass)

|                                                                                 | Green Flag | Tick |
|---------------------------------------------------------------------------------|------------|------|
| Catalyst or enzyme used, or reaction takes place without any catalyst/reagents. | Green Flag |      |
| Use of stoichiometric quantities of reagents                                    | Amber Flag | X    |
| Use of reagents in excess                                                       | Red Flag   |      |

|                                    | Green Flag | Tick |
|------------------------------------|------------|------|
| Facile recovery of catalyst/enzyme | Green Flag |      |
| catalyst/enzyme not recovered      | Amber Flag |      |

**Critical elements**

| Supply remaining | Flag colour | Note element |
|------------------|-------------|--------------|
| 5-50 years       | Red Flag    |              |
| 50-500 years     | Amber Flag  | AI           |
| +500 years       | Green Flag  |              |

| Energy (First Pass)                          |            | Tick |
|----------------------------------------------|------------|------|
| Reaction run between 0 to 70°C               | Green Flag | X    |
| Reaction run between -20 to 0 or 70 to 140°C | Amber Flag |      |
| Reaction run below -20 or above 140°C        | Red Flag   |      |

| Batch/flow |            | Tick |
|------------|------------|------|
| Flow       | Green Flag |      |
| Batch      | Amber Flag | X    |

|                                                          |            | Tick |
|----------------------------------------------------------|------------|------|
| Reaction run at reflux                                   | Red Flag   |      |
| Reaction run 5°C or more below the solvent boiling point | Green Flag | X    |

| Work Up                                                                                                                                  |            | List |
|------------------------------------------------------------------------------------------------------------------------------------------|------------|------|
| quenching<br>filtration<br>centrifugation<br>crystallisation                                                                             | Green Flag |      |
| Low temperature distillation/evaporation/<br>sublimation (< 140 °C at atmospheric<br>solvent exchange, quenching into aqueous<br>solvent | Amber Flag | X    |
| chromatography/ion exchange<br>high temperature<br>multiple recrystallisation                                                            | Red Flag   |      |

| Health & safety                   |                              |                              | List substances and H-codes                                | List substances and H-codes | List substances and H-codes |  |
|-----------------------------------|------------------------------|------------------------------|------------------------------------------------------------|-----------------------------|-----------------------------|--|
| <b>Highly explosive</b>           | Red Flag                     | Amber Flag                   | Green Flag                                                 |                             |                             |  |
|                                   | H200, H201, H202, H203       | H205, H220, H224             | If no red or amber flagged H codes present then green flag |                             |                             |  |
| <b>Explosive thermal runaway</b>  | H230, H240, H250             | H241                         |                                                            |                             | Catechol H301, H311         |  |
| <b>Toxic</b>                      | H300, H310, H330             | H301, H311, H331,            |                                                            |                             |                             |  |
| <b>Long Term toxicity</b>         | H340, H350, H360, H370, H372 | H341, H351, H361, H371, H373 |                                                            |                             | Catechol H341, H401         |  |
| <b>Environmental implications</b> | H400, H410, H411, H420       | H401, H412                   |                                                            |                             |                             |  |
|                                   |                              |                              |                                                            | Catechol H350               |                             |  |

| Use of chemicals of environmental concern                                            |          | List substances of very high concern |
|--------------------------------------------------------------------------------------|----------|--------------------------------------|
| Chemical identified as Substances of Very High Concern by ChemSec which are utilised | Red Flag |                                      |

## Classical approach: Step 6

Yield, AE, RME, MI/PMI and OE

| Reactant (Limiting Reactant First) | Mass (g)    | MW            | Mol   | Catalyst                             | Mass (g)     | Reagent | Mass (g)    | Reaction solvent | Volume (cm <sup>3</sup> ) | Density (g ml <sup>-1</sup> ) | Mass (g)      | Work up chemical | Mass (g)    | Workup solvent | Volume (cm <sup>3</sup> ) | Density (g ml <sup>-1</sup> ) | Mass (g) |             |
|------------------------------------|-------------|---------------|-------|--------------------------------------|--------------|---------|-------------|------------------|---------------------------|-------------------------------|---------------|------------------|-------------|----------------|---------------------------|-------------------------------|----------|-------------|
| 3,4-Dihydroxy mandelic acid        | 2.00        | 184.14        | 10.86 | CuCl <sub>2</sub> ·2H <sub>2</sub> O | 11.11        |         |             | EtOAc            | 140.00                    | 0.90                          | 126.28        |                  |             |                |                           |                               |          | 0.00        |
|                                    |             |               |       |                                      |              |         |             | H <sub>2</sub> O | 30.00                     | 1.00                          | 30.00         |                  |             |                |                           |                               |          | 0.00        |
|                                    |             |               |       |                                      |              |         |             |                  |                           |                               | 0.00          |                  |             |                |                           |                               |          | 0.00        |
|                                    |             |               |       |                                      |              |         |             |                  |                           |                               | 0.00          |                  |             |                |                           |                               |          | 0.00        |
|                                    |             |               |       |                                      |              |         |             |                  |                           |                               | 0.00          |                  |             |                |                           |                               |          | 0.00        |
|                                    |             |               |       |                                      |              |         |             |                  |                           |                               | 0.00          |                  |             |                |                           |                               |          | 0.00        |
| <b>Total</b>                       | <b>2.00</b> | <b>184.14</b> |       |                                      | <b>11.11</b> |         | <b>0.00</b> |                  |                           |                               | <b>156.28</b> |                  | <b>0.00</b> |                |                           |                               |          | <b>0.00</b> |

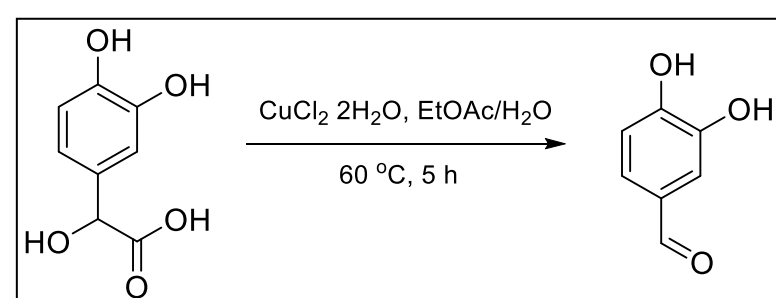

|                                   | Step   | Cumulative |
|-----------------------------------|--------|------------|
| Yield                             | 96.03  | 26.2       |
| Conversion                        | 100.0  | /          |
| Selectivity                       | 96.03  | /          |
| AE                                | 75.01  | 53.1       |
| RME                               | 72.00  | 17.10      |
| PMI total                         | 117.63 | 198.22     |
| PMI Reaction                      | 117.63 | 167.31     |
| PMI reactants, reagents, catalyst | 9.10   | 15.29      |
| PMI reaction solvents             | 108.53 | 152.025    |
| PMI Workup                        | 0.00   | 30.908     |
| PMI Workup chemical               | 0.00   | 1.173      |
| PMI workup solvents               | 0.00   | 29.735     |

| Product                     | Mass | MW     | Mol   |
|-----------------------------|------|--------|-------|
|                             | 1.44 | 138.12 | 10.43 |
|                             | mass |        |       |
| Unreacted limiting reactant |      |        |       |

**Experimental:** *Org. Process Res. Dev.* **2000**, *4*, 534–543.

3,4-Dihydroxy mandelic acid (2 g, 10.86 mmol) was dissolved in 140 mL of ethyl acetate, and 11.11 g of CuCl<sub>2</sub>·2H<sub>2</sub>O was dissolved in 30 mL of water. The two-phase system was vigorously stirred and heated at 60 °C for 5 h under nitrogen atmosphere. The organic phase was separated, and the solvent was removed. The HPLC analysis revealed a complete conversion of the mandelic acid derivative and the yield of protocatechualdehyde of 96%. The copper salt aqueous solution/suspension was recycled by oxidising Cu(I) to Cu(II) by air after the removal of the organic phase; the results were substantially unchanged.

### Solvents (First Pass)

| Preferred solvents                                                                                | water, EtOH, nBuOH, AcOipr, AcOnBu, PhOMe, MeOH, tBuOH, BnOH, ethylene glycol, acetone, MEK, MIBK, AcOEt, sulfolane                                                                     | List solvents below     |
|---------------------------------------------------------------------------------------------------|-----------------------------------------------------------------------------------------------------------------------------------------------------------------------------------------|-------------------------|
| <b>Problematic solvents:</b> (acceptable only if substitution does not offer advantages)          | DMSO, cyclohexanone, DMPU, AcOH, Ac <sub>2</sub> O, Acetonitrile, AcOMe, THF, heptane, Me-cyclohexane, toluene, xylene, MTBE, cyclohexane, chlorobenzene, formic acid, pyridine, Me-THF | H <sub>2</sub> O, EtOAc |
| <b>Hazardous solvents:</b> These solvents have significant health and/or safety concerns.         | dioxane, pentane, TEA, diisopropyl ether, DME, DCM, DMF, DMA, NMP, methoxyethanol, hexane                                                                                               |                         |
| <b>Highly hazardous solvents:</b> The solvents which are agreed not to be used, even in screening | Et <sub>2</sub> O, Benzene, CCl <sub>4</sub> , chloroform, DCE, nitromethane, CS <sub>2</sub> , HMPA                                                                                    |                         |

### Catalyst/enzyme (First Pass)

|                                                                                 |            | Tick |
|---------------------------------------------------------------------------------|------------|------|
| Catalyst or enzyme used, or reaction takes place without any catalyst/reagents. | Green Flag | X    |
| Use of stoichiometric quantities of reagents                                    | Amber Flag |      |
| Use of reagents in excess                                                       | Red Flag   |      |

|                                    |            | Tick |
|------------------------------------|------------|------|
| Facile recovery of catalyst/enzyme | Green Flag | X    |
| catalyst/enzyme not recovered      | Amber Flag |      |

**Critical elements**

| Supply remaining | Flag colour | Note element |
|------------------|-------------|--------------|
| 5-50 years       | Red Flag    |              |
| 50-500 years     | Amber Flag  | Cu           |
| +500 years       | Green Flag  |              |

| Energy (First Pass)                          |            | Tick |
|----------------------------------------------|------------|------|
| Reaction run between 0 to 70°C               | Green Flag | X    |
| Reaction run between -20 to 0 or 70 to 140°C | Amber Flag |      |
| Reaction run below -20 or above 140°C        | Red Flag   |      |

| Batch/flow |            | Tick |
|------------|------------|------|
| Flow       | Green Flag |      |
| Batch      | Amber Flag | X    |

|                                                          |            | Tick |
|----------------------------------------------------------|------------|------|
| Reaction run at reflux                                   | Red Flag   |      |
| Reaction run 5°C or more below the solvent boiling point | Green Flag | X    |

| Work Up                                                                                                                                  |            | List |
|------------------------------------------------------------------------------------------------------------------------------------------|------------|------|
| quenching<br>filtration<br>centrifugation<br>crystallisation                                                                             | Green Flag | X    |
| Low temperature distillation/evaporation/<br>sublimation (< 140 °C at atmospheric<br>solvent exchange, quenching into aqueous<br>solvent | Amber Flag |      |
| chromatography/ion exchange<br>high temperature<br>multiple recrystallisation                                                            | Red Flag   |      |

**Health & safety**

|                                   | Red Flag                     | Amber Flag                   | Green Flag                                                 | List substances and H-codes | List substances and H-codes | List substances and H-codes |
|-----------------------------------|------------------------------|------------------------------|------------------------------------------------------------|-----------------------------|-----------------------------|-----------------------------|
| <b>Highly explosive</b>           | H200, H201, H202, H203       | H205, H220, H224             | If no red or amber flagged H codes present then green flag |                             |                             |                             |
| <b>Explosive thermal runaway</b>  | H230, H240, H250             | H241                         |                                                            |                             |                             |                             |
| <b>Toxic</b>                      | H300, H310, H330             | H301, H311, H331,            |                                                            |                             |                             |                             |
| <b>Long Term toxicity</b>         | H340, H350, H360, H370, H372 | H341, H351, H361, H371, H373 |                                                            |                             |                             |                             |
| <b>Environmental implications</b> | H400, H410, H411, H420       | H401, H412                   |                                                            |                             | CuCl2 2H2O H400, H410       |                             |

**Use of chemicals of environmental concern**

|                                                                                      |          | List substances of very high concern |
|--------------------------------------------------------------------------------------|----------|--------------------------------------|
| Chemical identified as Substances of Very High Concern by ChemSec which are utilised | Red Flag |                                      |

## Classical approach: Step 7

Yield, AE, RME, MI/PMI and OE

| Reactant (Limiting Reactant First) | Mass (g)    | MW            | Mol  | Catalyst | Mass (g)    | Reagent | Mass (g)    | Reaction solvent | Volume (cm <sup>3</sup> ) | Density (g ml <sup>-1</sup> ) | Mass (g)    | Work up chemical | Mass (g)     | Workup solvent | Volume (cm <sup>3</sup> ) | Density (g ml <sup>-1</sup> ) | Mass (g)     |
|------------------------------------|-------------|---------------|------|----------|-------------|---------|-------------|------------------|---------------------------|-------------------------------|-------------|------------------|--------------|----------------|---------------------------|-------------------------------|--------------|
| Protocatechualdehyde               | 3.00        | 138.12        | 0.02 |          |             | NaOH    | 0.88        | DCM              | 3.30                      | 1.33                          | 4.39        | Na2SO4           | 21.40        | DCM            | 50.00                     | 1.33                          | 66.50        |
| (Me)2SO4                           | 2.70        | 126.13        | 0.02 |          |             |         |             | H2O              | 5.00                      | 1.00                          | 5.00        |                  |              |                |                           |                               | 0.00         |
|                                    |             |               |      |          |             |         |             |                  |                           |                               | 0.00        |                  |              |                |                           |                               | 0.00         |
|                                    |             |               |      |          |             |         |             |                  |                           |                               | 0.00        |                  |              |                |                           |                               | 0.00         |
|                                    |             |               |      |          |             |         |             |                  |                           |                               | 0.00        |                  |              |                |                           |                               | 0.00         |
|                                    |             |               |      |          |             |         |             |                  |                           |                               | 0.00        |                  |              |                |                           |                               | 0.00         |
| <b>Total</b>                       | <b>5.70</b> | <b>264.25</b> |      |          | <b>0.00</b> |         | <b>0.88</b> |                  |                           |                               | <b>9.39</b> |                  | <b>21.40</b> |                |                           |                               | <b>66.50</b> |

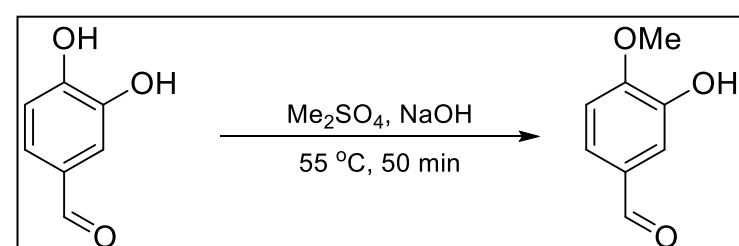

|                                   | Step  | Cumulative |
|-----------------------------------|-------|------------|
| Yield                             | 65.06 | 17.1       |
| Conversion                        | 71.2  | /          |
| Selectivity                       | 91.37 | /          |
| AE                                | 57.58 | 39.4       |
| RME                               | 37.71 | 10.62      |
| PMI total                         | 48.35 | 323.54     |
| PMI Reaction                      | 7.43  | 239.49     |
| PMI reactants, reagents, catalyst | 3.06  | 23.00      |
| PMI reaction solvents             | 4.37  | 216.501    |
| PMI Workup                        | 40.92 | 84.050     |
| PMI Workup chemical               | 9.96  | 11.599     |
| PMI workup solvents               | 30.96 | 72.450     |

| Product                     | Mass | MW     | Mol  |
|-----------------------------|------|--------|------|
|                             | 2.15 | 152.15 | 0.01 |
|                             | mass |        |      |
| Unreacted limiting reactant | 0.86 |        |      |

**Experimental:** *Org. Process Res. Dev.* **2000**, *4*, 534–543.

The reaction was carried out as in (A) at  $55\text{ }^\circ\text{C}$  by using 21.7 mmol of protocatechualdehyde and 4.5 mmol of NaOH and by simultaneously adding dropwise 21.4 mmol of dimethyl sulphate and 17.5 mmol of NaOH. The conversion was 70.8%, and the selectivity 93.2% in *iso*-vanillin, 4.0% of vanillin, and 2.8% of veratraldehyde.

Solvents (First Pass)

| Preferred solvents                                                                                | water, EtOH, nBuOH, AcOipr, AcOnBu, PhOMe, MeOH, tBuOH, BnOH, ethylene glycol, acetone, MEK, MIBK, AcOEt, sulfolane                                                        | List solvents below |
|---------------------------------------------------------------------------------------------------|----------------------------------------------------------------------------------------------------------------------------------------------------------------------------|---------------------|
| <b>Problematic solvents:</b> (acceptable only if substitution does not offer advantages)          | DMSO, cyclohexanone, DMPU, AcOH, Ac2O, Acetonitrile, AcOMe, THF, heptane, Me-cyclohexane, toluene, xylene, MTBE, cyclohexane, chlorobenzene, formic acid, pyridine, Me-THF | H2O                 |
| <b>Hazardous solvents:</b> These solvents have significant health and/or safety concerns.         | dioxane, pentane, TEA, diisopropyl ether, DME, DCM, DMF, DMA, NMP, methoxyethanol, hexane                                                                                  | DCM                 |
| <b>Highly hazardous solvents:</b> The solvents which are agreed not to be used, even in screening | Et <sub>2</sub> O, Benzene, CCl <sub>4</sub> , chloroform, DCE, nitromethane, CS <sub>2</sub> , HMPA                                                                       |                     |

Catalyst/enzyme (First Pass)

|                                                                                 |            | Tick |
|---------------------------------------------------------------------------------|------------|------|
| Catalyst or enzyme used, or reaction takes place without any catalyst/reagents. | Green Flag |      |
| Use of stoichiometric quantities of reagents                                    | Amber Flag | X    |
| Use of reagents in excess                                                       | Red Flag   |      |

|                                    |            | Tick |
|------------------------------------|------------|------|
| Facile recovery of catalyst/enzyme | Green Flag |      |
| catalyst/enzyme not recovered      | Amber Flag |      |

**Critical elements**

| Supply remaining | Flag colour | Note element |
|------------------|-------------|--------------|
| 5-50 years       | Red Flag    |              |
| 50-500 years     | Amber Flag  | S            |
| +500 years       | Green Flag  |              |

| Energy (First Pass)                          |            | Tick |
|----------------------------------------------|------------|------|
| Reaction run between 0 to 70°C               | Green Flag | X    |
| Reaction run between -20 to 0 or 70 to 140°C | Amber Flag |      |
| Reaction run below -20 or above 140°C        | Red Flag   |      |

| Batch/flow |            | Tick |
|------------|------------|------|
| Flow       | Green Flag |      |
| Batch      | Amber Flag | X    |

|                                                          |            | Tick |
|----------------------------------------------------------|------------|------|
| Reaction run at reflux                                   | Red Flag   | X    |
| Reaction run 5°C or more below the solvent boiling point | Green Flag |      |

| Work Up                                                                                                                                  |            | List |
|------------------------------------------------------------------------------------------------------------------------------------------|------------|------|
| quenching<br>filtration<br>centrifugation<br>crystallisation                                                                             | Green Flag |      |
| Low temperature distillation/evaporation/<br>sublimation (< 140 °C at atmospheric<br>solvent exchange, quenching into aqueous<br>solvent | Amber Flag | X    |
| chromatography/ion exchange<br>high temperature<br>multiple recrystallisation                                                            | Red Flag   |      |

**Health & safety**

|                            | Red Flag                     | Amber Flag                   | Green Flag                                                 | List substances and H-codes | List substances and H-codes | List substances and H-codes |
|----------------------------|------------------------------|------------------------------|------------------------------------------------------------|-----------------------------|-----------------------------|-----------------------------|
| Highly explosive           | H200, H201, H202, H203       | H205, H220, H224             | If no red or amber flagged H codes present then green flag |                             |                             |                             |
| Explosive thermal runaway  | H230, H240, H250             | H241                         |                                                            |                             |                             |                             |
| Toxic                      | H300, H310, H330             | H301, H311, H331,            |                                                            | Me2SO4 H330, H350           |                             |                             |
| Long Term toxicity         | H340, H350, H360, H370, H372 | H341, H351, H361, H371, H373 |                                                            |                             | Me2SO4 H301, H341           |                             |
| Environmental implications | H400, H410, H411, H420       | H401, H412                   |                                                            |                             |                             |                             |

**Use of chemicals of environmental concern**

|                                                                                      |          | List substances of very high concern |
|--------------------------------------------------------------------------------------|----------|--------------------------------------|
| Chemical identified as Substances of Very High Concern by ChemSec which are utilised | Red Flag |                                      |

## Classical approach: Step 8

Yield, AE, RME, MI/PMI and OE

| Reactant (Limiting Reactant First)          | Mass (g)     | MW            | Mol   | Catalyst | Mass (g)    | Reagent | Mass (g)    | Reaction solvent | Volume (cm <sup>3</sup> ) | Density (g ml <sup>-1</sup> ) | Mass (g)      | Work up chemical | Mass (g)      | Workup solvent | Volume (cm <sup>3</sup> ) | Density (g ml <sup>-1</sup> ) | Mass (g)       |
|---------------------------------------------|--------------|---------------|-------|----------|-------------|---------|-------------|------------------|---------------------------|-------------------------------|---------------|------------------|---------------|----------------|---------------------------|-------------------------------|----------------|
| Isovanillin                                 | 10.00        | 152.15        | 65.70 |          |             |         |             | DCM              | 220.00                    | 1.33                          | 292.60        | SiO <sub>2</sub> | 525.60        | Hexane         | 4161.00                   | 0.66                          | 2725.46        |
| carbmethoxy methylene triphenyl phosphorane | 24.20        | 334.35        | 72.30 |          |             |         |             |                  |                           |                               | 0.00          |                  |               | EtOAc          | 2409.00                   | 0.90                          | 2172.92        |
|                                             |              |               |       |          |             |         |             |                  |                           |                               | 0.00          |                  |               |                |                           |                               | 0.00           |
|                                             |              |               |       |          |             |         |             |                  |                           |                               | 0.00          |                  |               |                |                           |                               | 0.00           |
|                                             |              |               |       |          |             |         |             |                  |                           |                               | 0.00          |                  |               |                |                           |                               | 0.00           |
|                                             |              |               |       |          |             |         |             |                  |                           |                               | 0.00          |                  |               |                |                           |                               | 0.00           |
| <b>Total</b>                                | <b>34.20</b> | <b>486.50</b> |       |          | <b>0.00</b> |         | <b>0.00</b> |                  |                           |                               | <b>292.60</b> |                  | <b>525.60</b> |                |                           |                               | <b>4898.37</b> |

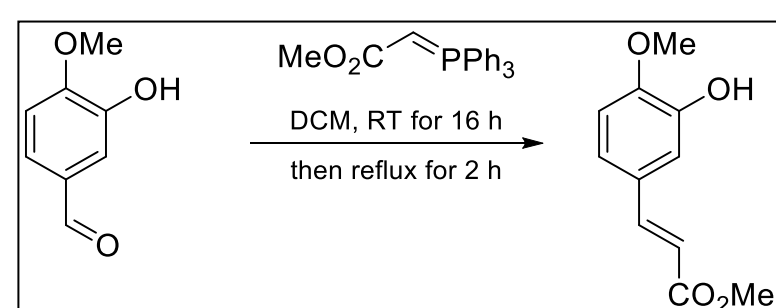

|                                   | Step   | Cumulative |
|-----------------------------------|--------|------------|
| Yield                             | 96.65  | 16.5       |
| Conversion                        | 100.0  | /          |
| Selectivity                       | 96.65  | /          |
| AE                                | 42.80  | 28.9       |
| RME                               | 38.60  | 11.15      |
| PMI total                         | 435.66 | 680.01     |
| PMI Reaction                      | 24.76  | 205.43     |
| PMI reactants, reagents, catalyst | 2.59   | 19.25      |
| PMI reaction solvents             | 22.17  | 186.183    |
| PMI Workup chemical               | 410.91 | 474.581    |
| PMI workup solvents               | 39.82  | 48.606     |
|                                   | 371.09 | 425.975    |

|                                    | Mass         | MW            | Mol          |
|------------------------------------|--------------|---------------|--------------|
| <b>Product</b>                     | <b>13.20</b> | <b>208.21</b> | <b>63.50</b> |
|                                    | mass         |               |              |
| <b>Unreacted limiting reactant</b> |              |               |              |

**Experimental:** *Angew. Chem. Int. Ed.* **2013**, *52*, 9845–9848.

Isovanillin (**6**; 10.0 g, 65.7 mmol, 1.0 equiv.) and carbomethoxy methylene triphenyl phosphorane (24.2 g, 72.3 mmol, 1.1 equiv.) were dissolved in DCM (220 mL) and stirred at room temperature for 16 h. The mixture was then heated to reflux for 2 h. After cooling, the solvent was removed *in vacuo* and the crude product was purified by flash silica gel column chromatography (hexanes/EtOAc, 2:1 → 3:2) to yield olefin **10** (13.2 g, 63.5 mmol, 97%) as a colorless solid.

Solvents (First Pass)

| Preferred solvents                                                                                | water, EtOH, nBuOH, AcOipr, AcOnBu, PhOMe, MeOH, tBuOH, BnOH, ethylene glycol, acetone, MEK, MIBK, AcOEt, sulfolane                                                                             | List solvents below |
|---------------------------------------------------------------------------------------------------|-------------------------------------------------------------------------------------------------------------------------------------------------------------------------------------------------|---------------------|
| <b>Problematic solvents:</b> (acceptable only if substitution does not offer advantages)          | DMSO, cyclohexanone, DMPU, AcOH, Ac <sub>2</sub> O, Acetonitrile, AcOMe, THF, heptane, Me-cyclohexane, toluene, xylene, MTBE, <b>cyclohexane</b> , chlorobenzene, formic acid, pyridine, Me-THF | EtOAc               |
| <b>Hazardous solvents:</b> These solvents have significant health and/or safety concerns.         | dioxane, pentane, TEA, diisopropyl ether, DME, DCM, DMF, DMA, NMP, methoxyethanol, hexane                                                                                                       | DCM, hexane         |
| <b>Highly hazardous solvents:</b> The solvents which are agreed not to be used, even in screening | Et <sub>2</sub> O, Benzene, CCl <sub>4</sub> , chloroform, DCE, nitromethane, CS <sub>2</sub> , HMPA                                                                                            |                     |

Catalyst/enzyme (First Pass)

|                                                                                 | Green Flag | Amber Flag | Red Flag | Tick |
|---------------------------------------------------------------------------------|------------|------------|----------|------|
| Catalyst or enzyme used, or reaction takes place without any catalyst/reagents. | Green Flag |            |          |      |
| Use of stoichiometric quantities of reagents                                    | Amber Flag | X          |          |      |
| Use of reagents in excess                                                       | Red Flag   |            |          |      |

|                                    | Green Flag | Amber Flag | Red Flag | Tick |
|------------------------------------|------------|------------|----------|------|
| Facile recovery of catalyst/enzyme | Green Flag |            |          |      |
| catalyst/enzyme not recovered      | Amber Flag |            |          |      |

**Critical elements**

| Supply remaining | Flag colour | Note element |
|------------------|-------------|--------------|
| 5-50 years       | Red Flag    |              |
| 50-500 years     | Amber Flag  | P            |
| +500 years       | Green Flag  |              |

| Energy (First Pass)                          | Flag       | Tick |
|----------------------------------------------|------------|------|
| Reaction run between 0 to 70°C               | Green Flag | X    |
| Reaction run between -20 to 0 or 70 to 140°C | Amber Flag |      |
| Reaction run below -20 or above 140°C        | Red Flag   |      |

| Batch/flow | Flag       | Tick |
|------------|------------|------|
| Flow       | Green Flag |      |
| Batch      | Amber Flag | X    |

|                                                          | Flag       | Tick |
|----------------------------------------------------------|------------|------|
| Reaction run at reflux                                   | Red Flag   | X    |
| Reaction run 5°C or more below the solvent boiling point | Green Flag |      |

| Work Up                                                                                                                                  | Flag       | List |
|------------------------------------------------------------------------------------------------------------------------------------------|------------|------|
| quenching<br>filtration<br>centrifugation<br>crystallisation                                                                             | Green Flag |      |
| Low temperature distillation/evaporation/<br>sublimation (< 140 °C at atmospheric<br>solvent exchange, quenching into aqueous<br>solvent | Amber Flag |      |
| chromatography/ion exchange<br>high temperature<br>multiple recrystallisation                                                            | Red Flag   | X    |

**Health & safety**

|                                   | Red Flag                     | Amber Flag                   | Green Flag                                                 | List substances and H-codes | List substances and H-codes | List substances and H-codes |
|-----------------------------------|------------------------------|------------------------------|------------------------------------------------------------|-----------------------------|-----------------------------|-----------------------------|
| <b>Highly explosive</b>           | H200, H201, H202, H203       | H205, H220, H224             | If no red or amber flagged H codes present then green flag |                             |                             |                             |
| <b>Explosive thermal runaway</b>  | H230, H240, H250             | H241                         |                                                            |                             |                             |                             |
| <b>Toxic</b>                      | H300, H310, H330             | H301, H311, H331,            |                                                            |                             |                             |                             |
| <b>Long Term toxicity</b>         | H340, H350, H360, H370, H372 | H341, H351, H361, H371, H373 |                                                            |                             |                             |                             |
| <b>Environmental implications</b> | H400, H410, H411, H420       | H401, H412                   |                                                            |                             |                             |                             |

**Use of chemicals of environmental concern**

|                                                                                      | Flag     | List substances of very high concern |
|--------------------------------------------------------------------------------------|----------|--------------------------------------|
| Chemical identified as Substances of Very High Concern by ChemSec which are utilised | Red Flag |                                      |



## Classical approach: Step 9

Yield, AE, RME, MI/PMI and OE

| Reactant (Limiting Reactant First)               | Mass (g)     | MW            | Mol   | Catalyst       | Mass (g)    | Reagent | Mass (g)    | Reaction solvent | Volume (cm <sup>3</sup> ) | Density (g ml <sup>-1</sup> ) | Mass (g)      | Work up chemical | Mass (g)      | Workup solvent | Volume (cm <sup>3</sup> ) | Density (g ml <sup>-1</sup> ) | Mass (g)      |
|--------------------------------------------------|--------------|---------------|-------|----------------|-------------|---------|-------------|------------------|---------------------------|-------------------------------|---------------|------------------|---------------|----------------|---------------------------|-------------------------------|---------------|
| methyl (E)-3-(3-hydroxy-4-methoxyphenyl)acrylate | 13.20        | 208.21        | 0.06  | Pd on charcoal | 2.60        |         |             | MeOH             | 150.00                    | 0.79                          | 118.80        | Celite           | 126.80        | DCM            | 317.00                    | 1.33                          | 421.61        |
| hydrogen                                         | 4.32         | 2.02          | 20.73 |                |             |         |             |                  |                           |                               | 0.00          |                  |               |                |                           |                               | 0.00          |
|                                                  |              |               |       |                |             |         |             |                  |                           |                               | 0.00          |                  |               |                |                           |                               | 0.00          |
|                                                  |              |               |       |                |             |         |             |                  |                           |                               | 0.00          |                  |               |                |                           |                               | 0.00          |
|                                                  |              |               |       |                |             |         |             |                  |                           |                               | 0.00          |                  |               |                |                           |                               | 0.00          |
|                                                  |              |               |       |                |             |         |             |                  |                           |                               | 0.00          |                  |               |                |                           |                               | 0.00          |
| <b>Total</b>                                     | <b>17.52</b> | <b>210.23</b> |       |                | <b>2.60</b> |         | <b>0.00</b> |                  |                           |                               | <b>118.80</b> |                  | <b>126.80</b> |                |                           |                               | <b>421.61</b> |

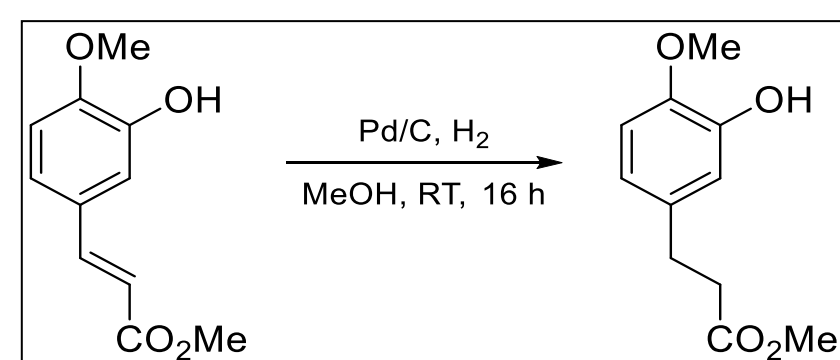

|                                   | Step  | Cumulative |
|-----------------------------------|-------|------------|
| Yield                             | 99.84 | 16.5       |
| Conversion                        | 100.0 | /          |
| Selectivity                       | 99.84 | /          |
| AE                                | 99.04 | 28.8       |
| RME                               | 75.93 | 10.84      |
| PMI total                         | 51.68 | 725.59     |
| PMI Reaction                      | 10.44 | 213.34     |
| PMI reactants, reagents, catalyst | 1.51  | 19.63      |
| PMI reaction solvents             | 8.93  | 193.715    |
| PMI Workup                        | 41.23 | 512.247    |
| PMI Workup chemical               | 9.53  | 57.774     |
| PMI workup solvents               | 31.70 | 454.473    |

|                             | Mass  | MW     | Mol  |
|-----------------------------|-------|--------|------|
| Product                     | 13.30 | 208.21 | 0.06 |
| Unreacted limiting reactant | mass  |        |      |

**Experimental:** *Angew. Chem. Int. Ed.* **2013**, *52*, 9845–9848.

Olefin **10** (13.2 g, 63.4 mmol) was dissolved in MeOH (150 mL) and palladium on charcoal (2.60 g; 10%) was added. The reaction flask was evacuated and repurged with hydrogen (5x) and then stirred at room temperature under a hydrogen atmosphere for 16 h, filtered through Celite and washed thoroughly with DCM. The solvent was removed under reduced pressure, yielding compound **11** quantitatively (13.3 g, 63.3 mmol, 100%) as a colorless solid.

Solvents (First Pass)

| Preferred solvents                                                                         | water, EtOH, nBuOH, AcOipr, AcOnBu, PhOMe, MeOH, tBuOH, BnOH, ethylene glycol, acetone, MEK, MIBK, AcOEt, sulfolane                                                                     | List solvents below |
|--------------------------------------------------------------------------------------------|-----------------------------------------------------------------------------------------------------------------------------------------------------------------------------------------|---------------------|
| Problematic solvents: (acceptable only if substitution does not offer advantages)          | DMSO, cyclohexanone, DMPU, AcOH, Ac <sub>2</sub> O, Acetonitrile, AcOME, THF, heptane, Me-cyclohexane, toluene, xylene, MTBE, cyclohexane, chlorobenzene, formic acid, pyridine, Me-THF | MeOH                |
| Hazardous solvents: These solvents have significant health and/or safety concerns.         | dioxane, pentane, TEA, diisopropyl ether, DME, DCM, DMF, DMA, NMP, methoxyethanol, hexane                                                                                               | DCM                 |
| Highly hazardous solvents: The solvents which are agreed not to be used, even in screening | Et <sub>2</sub> O, Benzene, CCl <sub>4</sub> , chloroform, DCE, nitromethane, CS <sub>2</sub> , HMPA                                                                                    |                     |

Catalyst/enzyme (First Pass)

|                                                                                 | Green Flag | Amber Flag | Red Flag | Tick |
|---------------------------------------------------------------------------------|------------|------------|----------|------|
| Catalyst or enzyme used, or reaction takes place without any catalyst/reagents. |            |            |          | X    |
| Use of stoichiometric quantities of reagents                                    |            |            |          |      |
| Use of reagents in excess                                                       |            |            |          |      |

|                                    | Green Flag | Amber Flag | Tick |
|------------------------------------|------------|------------|------|
| Facile recovery of catalyst/enzyme |            |            | X    |
| catalyst/enzyme not recovered      |            |            |      |

**Critical elements**

| Supply remaining | Flag colour | Note element |
|------------------|-------------|--------------|
| 5-50 years       | Red Flag    |              |
| 50-500 years     | Amber Flag  | Pd           |
| +500 years       | Green Flag  |              |

**Energy (First Pass)**

|                                              | Flag colour | Tick |
|----------------------------------------------|-------------|------|
| Reaction run between 0 to 70°C               | Green Flag  | X    |
| Reaction run between -20 to 0 or 70 to 140°C | Amber Flag  |      |
| Reaction run below -20 or above 140°C        | Red Flag    |      |

**Batch/flow**

|       | Flag colour | Tick |
|-------|-------------|------|
| Flow  | Green Flag  |      |
| Batch | Amber Flag  | X    |

|                                                          | Flag colour | Tick |
|----------------------------------------------------------|-------------|------|
| Reaction run at reflux                                   | Red Flag    |      |
| Reaction run 5°C or more below the solvent boiling point | Green Flag  |      |

**Work Up**

|                                                                                                                                          | Flag colour | List |
|------------------------------------------------------------------------------------------------------------------------------------------|-------------|------|
| quenching<br>filtration<br>centrifugation<br>crystallisation                                                                             | Green Flag  | X    |
| Low temperature distillation/evaporation/<br>sublimation (< 140 °C at atmospheric<br>solvent exchange, quenching into aqueous<br>solvent | Amber Flag  |      |
| chromatography/ion exchange<br>high temperature<br>multiple recrystallisation                                                            | Red Flag    |      |

**Health & safety**

|                                   | Red Flag                     | Amber Flag                   | Green Flag                                                 | List substances and H-codes | List substances and H-codes | List substances and H-codes |
|-----------------------------------|------------------------------|------------------------------|------------------------------------------------------------|-----------------------------|-----------------------------|-----------------------------|
| <b>Highly explosive</b>           | H200, H201, H202, H203       | H205, H220, H224             | If no red or amber flagged H codes present then green flag |                             |                             |                             |
| <b>Explosive thermal runaway</b>  | H230, H240, H250             | H241                         |                                                            |                             |                             |                             |
| <b>Toxic</b>                      | H300, H310, H330             | H301, H311, H331,            |                                                            |                             |                             |                             |
| <b>Long Term toxicity</b>         | H340, H350, H360, H370, H372 | H341, H351, H361, H371, H373 |                                                            |                             |                             |                             |
| <b>Environmental implications</b> | H400, H410, H411, H420       | H401, H412                   |                                                            |                             |                             |                             |

**Use of chemicals of environmental concern**

|                                                                                      | Flag colour | List substances of very high concern |
|--------------------------------------------------------------------------------------|-------------|--------------------------------------|
| Chemical identified as Substances of Very High Concern by ChemSec which are utilised | Red Flag    |                                      |

## Classical approach: Step 10

Yield, AE, RME, MI/PMI and OE

| Reactant (Limiting Reactant First)             | Mass (g)     | MW            | Mol  | Catalyst | Mass (g)    | Reagent | Mass (g)    | Reaction solvent        | Volume (cm <sup>3</sup> ) | Density (g ml <sup>-1</sup> ) | Mass (g)      | Work up chemical  | Mass (g)     | Workup solvent         | Volume (cm <sup>3</sup> ) | Density (g ml <sup>-1</sup> ) | Mass (g)      |
|------------------------------------------------|--------------|---------------|------|----------|-------------|---------|-------------|-------------------------|---------------------------|-------------------------------|---------------|-------------------|--------------|------------------------|---------------------------|-------------------------------|---------------|
| methyl 3-(3-hydroxy-4-methoxyphenyl)propanoate | 13.20        | 210.23        | 0.06 |          |             | LiOH    | 1.68        | THF                     | 100.00                    | 0.89                          | 88.80         | HCl               | 4.58         | H <sub>2</sub> O (HCl) | 62.80                     | 1.00                          | 62.80         |
|                                                |              |               |      |          |             |         |             | H <sub>2</sub> O (LiOH) | 55.00                     | 1.00                          | 55.00         | NaCl              | 26.93        | EtOAc                  | 150.00                    | 0.90                          | 135.30        |
|                                                |              |               |      |          |             |         |             |                         |                           |                               | 0.00          | MgSO <sub>4</sub> | 62.80        | H <sub>2</sub> O(NaCl) | 75.00                     | 1.00                          | 75.00         |
|                                                |              |               |      |          |             |         |             |                         |                           |                               | 0.00          |                   |              |                        |                           |                               | 0.00          |
|                                                |              |               |      |          |             |         |             |                         |                           |                               | 0.00          |                   |              |                        |                           |                               | 0.00          |
|                                                |              |               |      |          |             |         |             |                         |                           |                               | 0.00          |                   |              |                        |                           |                               | 0.00          |
|                                                |              |               |      |          |             |         |             |                         |                           |                               | 0.00          |                   |              |                        |                           |                               | 0.00          |
| <b>Total</b>                                   | <b>13.20</b> | <b>210.23</b> |      |          | <b>0.00</b> |         | <b>1.68</b> |                         |                           |                               | <b>143.80</b> |                   | <b>94.31</b> |                        |                           |                               | <b>273.10</b> |

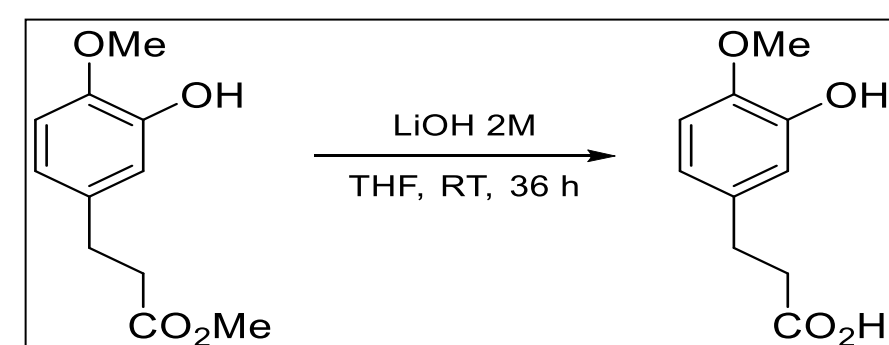

|                                   | Step  | Cumulative |
|-----------------------------------|-------|------------|
| Yield                             | 98.25 | 16.2       |
| Conversion                        | 100.0 | /          |
| Selectivity                       | 98.25 | /          |
| AE                                | 93.33 | 26.9       |
| RME                               | 91.67 | 9.94       |
| PMI total                         | 43.48 | 833.94     |
| PMI Reaction                      | 13.11 | 244.76     |
| PMI reactants, reagents, catalyst | 1.23  | 21.55      |
| PMI reaction solvents             | 11.88 | 223.210    |
| PMI Workup                        | 30.36 | 589.179    |
| PMI Workup chemical               | 7.79  | 70.820     |
| PMI workup solvents               | 22.57 | 518.359    |

|                             | Mass  | MW     | Mol  |
|-----------------------------|-------|--------|------|
| Product                     | 12.10 | 196.20 | 0.06 |
| Unreacted limiting reactant | mass  |        |      |

**Experimental:** *Angew. Chem. Int. Ed.* **2013**, *52*, 9845–9848.

Methyl ester **11** (13.2 g, 62.8 mmol) was dissolved in THF (100 mL) and a 2M solution of LiOH (35 mL) was added. The mixture was stirred for 16 h at room temperature. Since TLC indicated remaining starting material, another 20 mL of 2M LiOH was added and stirred for another 20 h. The mixture was acidified to pH 2-3 with 2M HCl and extracted with EtOAc (3x 50 mL). The combined organic phases were washed with brine (75 mL), dried over MgSO<sub>4</sub>, and concentrated under reduced pressure to yield free acid **12** (12.1 g, 61.7 mmol, 98%) as a colorless solid.

Solvents (First Pass)

| Preferred solvents                                                                         | water, EtOH, nBuOH, AcOipr, AcOnBu, PhOMe, MeOH, tBuOH, BnOH, ethylene glycol, acetone, MEK, MIBK, AcOEt, sulfolane                                                                     | List solvents below     |
|--------------------------------------------------------------------------------------------|-----------------------------------------------------------------------------------------------------------------------------------------------------------------------------------------|-------------------------|
| Problematic solvents: (acceptable only if substitution does not offer advantages)          | DMSO, cyclohexanone, DMPU, AcOH, Ac <sub>2</sub> O, Acetonitrile, AcOMe, THF, heptane, Me-cyclohexane, toluene, xylene, MTBE, cyclohexane, chlorobenzene, formic acid, pyridine, Me-THF | H <sub>2</sub> O, EtOAc |
| Hazardous solvents: These solvents have significant health and/or safety concerns.         | dioxane, pentane, TEA, diisopropyl ether, DME, DCM, DMF, DMA, NMP, methoxyethanol, hexane                                                                                               | THF                     |
| Highly hazardous solvents: The solvents which are agreed not to be used, even in screening | Et <sub>2</sub> O, Benzene, CCl <sub>4</sub> , chloroform, DCE, nitromethane, CS <sub>2</sub> , HMPA                                                                                    |                         |

Catalyst/enzyme (First Pass)

|                                                                                 | Green Flag | Amber Flag | Red Flag | Tick |
|---------------------------------------------------------------------------------|------------|------------|----------|------|
| Catalyst or enzyme used, or reaction takes place without any catalyst/reagents. |            |            |          |      |
| Use of stoichiometric quantities of reagents                                    |            |            |          | X    |
| Use of reagents in excess                                                       |            |            |          |      |

|                                    | Green Flag | Amber Flag | Tick |
|------------------------------------|------------|------------|------|
| Facile recovery of catalyst/enzyme |            |            |      |
| catalyst/enzyme not recovered      |            |            |      |

**Critical elements**

| Supply remaining | Flag colour | Note element |
|------------------|-------------|--------------|
| 5-50 years       | Red Flag    |              |
| 50-500 years     | Amber Flag  | Li           |
| +500 years       | Green Flag  |              |

| Energy (First Pass)                          |            | Tick |
|----------------------------------------------|------------|------|
| Reaction run between 0 to 70°C               | Green Flag | X    |
| Reaction run between -20 to 0 or 70 to 140°C | Amber Flag |      |
| Reaction run below -20 or above 140°C        | Red Flag   |      |

| Batch/flow |            | Tick |
|------------|------------|------|
| Flow       | Green Flag |      |
| Batch      | Amber Flag | X    |

|                                                          |            | Tick |
|----------------------------------------------------------|------------|------|
| Reaction run at reflux                                   | Red Flag   |      |
| Reaction run 5°C or more below the solvent boiling point | Green Flag |      |

| Work Up                                                                                                                                  |            | List |
|------------------------------------------------------------------------------------------------------------------------------------------|------------|------|
| quenching<br>filtration<br>centrifugation<br>crystallisation                                                                             | Green Flag |      |
| Low temperature distillation/evaporation/<br>sublimation (< 140 °C at atmospheric<br>solvent exchange, quenching into aqueous<br>solvent | Amber Flag | X    |
| chromatography/ion exchange<br>high temperature<br>multiple recrystallisation                                                            | Red Flag   |      |

**Health & safety**

|                            | Red Flag                     | Amber Flag                   | Green Flag                                                 | List substances and H-codes | List substances and H-codes | List substances and H-codes                         |
|----------------------------|------------------------------|------------------------------|------------------------------------------------------------|-----------------------------|-----------------------------|-----------------------------------------------------|
| Highly explosive           | H200, H201, H202, H203       | H205, H220, H224             | If no red or amber flagged H codes present then green flag |                             |                             |                                                     |
| Explosive thermal runaway  | H230, H240, H250             | H241                         |                                                            |                             |                             |                                                     |
| Toxic                      | H300, H310, H330             | H301, H311, H331,            |                                                            |                             |                             |                                                     |
| Long Term toxicity         | H340, H350, H360, H370, H372 | H341, H351, H361, H371, H373 |                                                            |                             |                             | methyl 3-(3-hydroxy-4-methoxyphenyl)propanoate H351 |
| Environmental implications | H400, H410, H411, H420       | H401, H412                   |                                                            |                             |                             |                                                     |

**Use of chemicals of environmental concern**

|                                                                                      |          | List substances of very high concern |
|--------------------------------------------------------------------------------------|----------|--------------------------------------|
| Chemical identified as Substances of Very High Concern by ChemSec which are utilised | Red Flag |                                      |

## Classical approach: Step 11

Yield, AE, RME, MI/PMI and OE

| Reactant (Limiting Reactant First)          | Mass (g)     | MW            | Mol  | Catalyst | Mass (g)    | Reagent    | Mass (g)     | Reaction solvent | Volume (cm <sup>3</sup> ) | Density (g ml <sup>-1</sup> ) | Mass (g)    | Work up chemical   | Mass (g)      | Workup solvent                        | Volume (cm <sup>3</sup> ) | Density (g ml <sup>-1</sup> ) | Mass (g)       |
|---------------------------------------------|--------------|---------------|------|----------|-------------|------------|--------------|------------------|---------------------------|-------------------------------|-------------|--------------------|---------------|---------------------------------------|---------------------------|-------------------------------|----------------|
| 3-(3-hydroxy-4-methoxyphenyl)propanoic acid | 12.10        | 196.20        | 0.06 |          |             | Mol sieves | 10.00        |                  |                           |                               | 0.00        | HCl                | 16.41         | DCM                                   | 300.00                    | 1.33                          | 399.00         |
| benzyl amine                                | 39.65        | 107.15        | 0.37 |          |             |            |              |                  |                           |                               | 0.00        | NaHCO <sub>3</sub> | 28.80         | H <sub>2</sub> O(HCl)                 | 450.00                    | 1.00                          | 450.00         |
|                                             |              |               |      |          |             |            |              |                  |                           |                               | 0.00        | NaCl               | 35.90         | H <sub>2</sub> O(NaHCO <sub>3</sub> ) | 300.00                    | 1.00                          | 300.00         |
|                                             |              |               |      |          |             |            |              |                  |                           |                               | 0.00        | MgSO <sub>4</sub>  | 61.70         | H <sub>2</sub> O                      | 100.00                    | 1.00                          | 100.00         |
|                                             |              |               |      |          |             |            |              |                  |                           |                               | 0.00        | SiO <sub>2</sub>   | 493.60        | H <sub>2</sub> O (NaCl)               | 100.00                    | 1.00                          | 100.00         |
|                                             |              |               |      |          |             |            |              |                  |                           |                               | 0.00        |                    |               | DCM                                   | 5954.05                   | 1.33                          | 7918.89        |
|                                             |              |               |      |          |             |            |              |                  |                           |                               | 0.00        |                    |               | MeOH                                  | 215.95                    | 0.79                          | 171.03         |
| <b>Total</b>                                | <b>51.75</b> | <b>303.35</b> |      |          | <b>0.00</b> |            | <b>10.00</b> |                  |                           |                               | <b>0.00</b> |                    | <b>636.41</b> |                                       |                           |                               | <b>9438.92</b> |

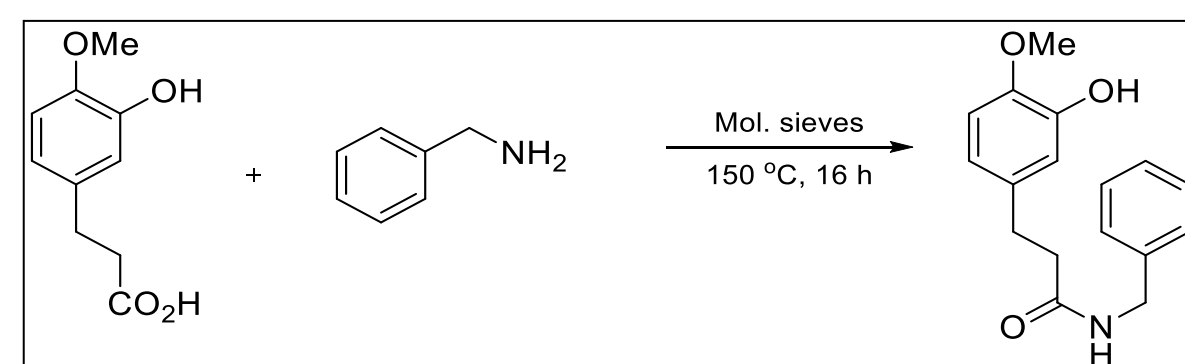

|                                   | Step    | Cumulative |
|-----------------------------------|---------|------------|
| Yield                             | 54.78   | 8.9        |
| Conversion                        | 100.0   | /          |
| Selectivity                       | 54.78   | /          |
| AE                                | 94.06   | 34.1       |
| RME                               | 18.65   | 5.98       |
| PMI total                         | 1050.47 | 2094.88    |
| PMI Reaction                      | 6.40    | 312.04     |
| PMI reactants, reagents, catalyst | 6.40    | 32.17      |
| PMI reaction solvents             | 0.00    | 279.880    |
| PMI Workup                        | 1044.08 | 1782.838   |
| PMI Workup chemical               | 65.95   | 154.749    |
| PMI workup solvents               | 978.13  | 1628.089   |

| Product                     | Mass | MW     | Mol  |
|-----------------------------|------|--------|------|
|                             | 9.65 | 285.34 | 0.03 |
| Unreacted limiting reactant | mass |        |      |

Experimental: *Angew. Chem. Int. Ed.* **2013**, *52*, 9845–9848.

Carboxylic acid **12** (12.1 g, 61.7 mmol, 1.0 equiv.) was heated together with benzyl amine (40.0 mL, 370 mmol, 6.0 equiv.) and 3 Å molecular sieves (10.0 g) to 150 °C for 16 h. The mixture was cooled, diluted with DCM (300 mL), washed with 1M HCl (3x 150 mL), a saturated solution of NaHCO<sub>3</sub> (2x 150 mL), water (100 mL) and brine (100 mL). The organic phase was dried over MgSO<sub>4</sub> and the solvent removed *in vacuo*. The crude product was purified by flash silica gel column chromatography (DCM/MeOH, 98:2 → 95:5) to give benzyl amide **13** (9.65 g, 33.8 mmol, 55%) as a colorless solid.

### Solvents (First Pass)

| Preferred solvents                                                                         | water, EtOH, nBuOH, AcOipr, AcOnBu, PhOMe, MeOH, tBuOH, BnOH, ethylene glycol, acetone, MEK, MIBK, AcOEt, sulfolane                                                                     | List solvents below    |
|--------------------------------------------------------------------------------------------|-----------------------------------------------------------------------------------------------------------------------------------------------------------------------------------------|------------------------|
| Problematic solvents: (acceptable only if substitution does not offer advantages)          | DMSO, cyclohexanone, DMPU, AcOH, Ac <sub>2</sub> O, Acetonitrile, AcOMe, THF, heptane, Me-cyclohexane, toluene, xylene, MTBE, cyclohexane, chlorobenzene, formic acid, pyridine, Me-THF | H <sub>2</sub> O, MeOH |
| Hazardous solvents: These solvents have significant health and/or safety concerns.         | dioxane, pentane, TEA, diisopropyl ether, DME, DCM, DMF, DMA, NMP, methoxyethanol, hexane                                                                                               | DCM                    |
| Highly hazardous solvents: The solvents which are agreed not to be used, even in screening | Et <sub>2</sub> O, Benzene, CCl <sub>4</sub> , chloroform, DCE, nitromethane, CS <sub>2</sub> , HMPA                                                                                    |                        |

### Catalyst/enzyme (First Pass)

|                                                                                 | Green Flag | Amber Flag | Red Flag | Tick |
|---------------------------------------------------------------------------------|------------|------------|----------|------|
| Catalyst or enzyme used, or reaction takes place without any catalyst/reagents. |            |            |          |      |
| Use of stoichiometric quantities of reagents                                    |            |            |          |      |
| Use of reagents in excess                                                       |            |            |          | X    |

|                                    | Green Flag | Amber Flag | Tick |
|------------------------------------|------------|------------|------|
| Facile recovery of catalyst/enzyme |            |            |      |
| catalyst/enzyme not recovered      |            |            |      |

**Critical elements**

| Supply remaining | Flag colour | Note element |
|------------------|-------------|--------------|
| 5-50 years       | Red Flag    |              |
| 50-500 years     | Amber Flag  |              |
| +500 years       | Green Flag  | C, N         |

**Energy (First Pass)**

|                                              |            | Tick |
|----------------------------------------------|------------|------|
| Reaction run between 0 to 70°C               | Green Flag |      |
| Reaction run between -20 to 0 or 70 to 140°C | Amber Flag |      |
| Reaction run below -20 or above 140°C        | Red Flag   | X    |

**Batch/flow**

|       |            | Tick |
|-------|------------|------|
| Flow  | Green Flag |      |
| Batch | Amber Flag | X    |

|                                                          |            | Tick |
|----------------------------------------------------------|------------|------|
| Reaction run at reflux                                   | Red Flag   |      |
| Reaction run 5°C or more below the solvent boiling point | Green Flag | X    |

**Work Up**

|                                                                                                                                          |            | List |
|------------------------------------------------------------------------------------------------------------------------------------------|------------|------|
| quenching<br>filtration<br>centrifugation<br>crystallisation                                                                             | Green Flag |      |
| Low temperature distillation/evaporation/<br>sublimation (< 140 °C at atmospheric<br>solvent exchange, quenching into aqueous<br>solvent | Amber Flag |      |
| chromatography/ion exchange<br>high temperature<br>multiple recrystallisation                                                            | Red Flag   | X    |

**Health & safety**

|                                   | Red Flag                     | Amber Flag                   | Green Flag                                                 | List substances and H-codes | List substances and H-codes   | List substances and H-codes |
|-----------------------------------|------------------------------|------------------------------|------------------------------------------------------------|-----------------------------|-------------------------------|-----------------------------|
| <b>Highly explosive</b>           | H200, H201, H202, H203       | H205, H220, H224             | If no red or amber flagged H codes present then green flag |                             |                               |                             |
| <b>Explosive thermal runaway</b>  | H230, H240, H250             | H241                         |                                                            |                             | benzyl amine H301, H351, H361 |                             |
| <b>Toxic</b>                      | H300, H310, H330             | H301, H311, H331,            |                                                            |                             |                               |                             |
| <b>Long Term toxicity</b>         | H340, H350, H360, H370, H372 | H341, H351, H361, H371, H373 |                                                            |                             | benzyl amine H310, H340       |                             |
| <b>Environmental implications</b> | H400, H410, H411, H420       | H401, H412                   |                                                            |                             |                               |                             |

**Use of chemicals of environmental concern**

|                                                                                      |          | List substances of very high concern |
|--------------------------------------------------------------------------------------|----------|--------------------------------------|
| Chemical identified as Substances of Very High Concern by ChemSec which are utilised | Red Flag |                                      |

## Classical approach: Step 12

Yield, AE, RME, MI/PMI and OE

| Reactant (Limiting Reactant First)                | Mass (g)     | MW            | Mol  | Catalyst | Mass (g)    | Reagent | Mass (g)    | Reaction solvent | Volume (cm <sup>3</sup> ) | Density (g ml <sup>-1</sup> ) | Mass (g)      | Work up chemical  | Mass (g)      | Workup solvent          | Volume (cm <sup>3</sup> ) | Density (g ml <sup>-1</sup> ) | Mass (g)       |
|---------------------------------------------------|--------------|---------------|------|----------|-------------|---------|-------------|------------------|---------------------------|-------------------------------|---------------|-------------------|---------------|-------------------------|---------------------------|-------------------------------|----------------|
| N-benzyl-3-(3-hydroxy-4-methoxyphenyl)propanamide | 9.65         | 285.34        | 0.03 |          |             |         |             | THF              | 300.00                    | 0.89                          | 266.40        | Rochelle's salt   | 330.00        | H2O (Rochelle's salt)   | 500.00                    | 1.00                          | 500.00         |
| LiAlH <sub>4</sub>                                | 2.57         | 37.95         | 0.07 |          |             |         |             |                  |                           |                               | 0.00          | MgSO <sub>4</sub> | 33.80         | EtOAc                   | 400.00                    | 0.90                          | 360.80         |
|                                                   |              |               |      |          |             |         |             |                  |                           |                               | 0.00          | SiO <sub>2</sub>  | 270.40        | H <sub>2</sub> O        | 200.00                    | 1.00                          | 200.00         |
|                                                   |              |               |      |          |             |         |             |                  |                           |                               | 0.00          | NaCl              | 71.80         | H <sub>2</sub> O (NaCl) | 200.00                    | 1.00                          | 200.00         |
|                                                   |              |               |      |          |             |         |             |                  |                           |                               | 0.00          |                   |               | DCM                     | 3145.90                   | 1.33                          | 4184.05        |
|                                                   |              |               |      |          |             |         |             |                  |                           |                               | 0.00          |                   |               | MeOH                    | 234.10                    | 0.79                          | 185.41         |
|                                                   |              |               |      |          |             |         |             |                  |                           |                               | 0.00          |                   |               |                         |                           |                               | 0.00           |
| <b>Total</b>                                      | <b>12.22</b> | <b>323.29</b> |      |          | <b>0.00</b> |         | <b>0.00</b> |                  |                           |                               | <b>266.40</b> |                   | <b>706.00</b> |                         |                           |                               | <b>5630.25</b> |

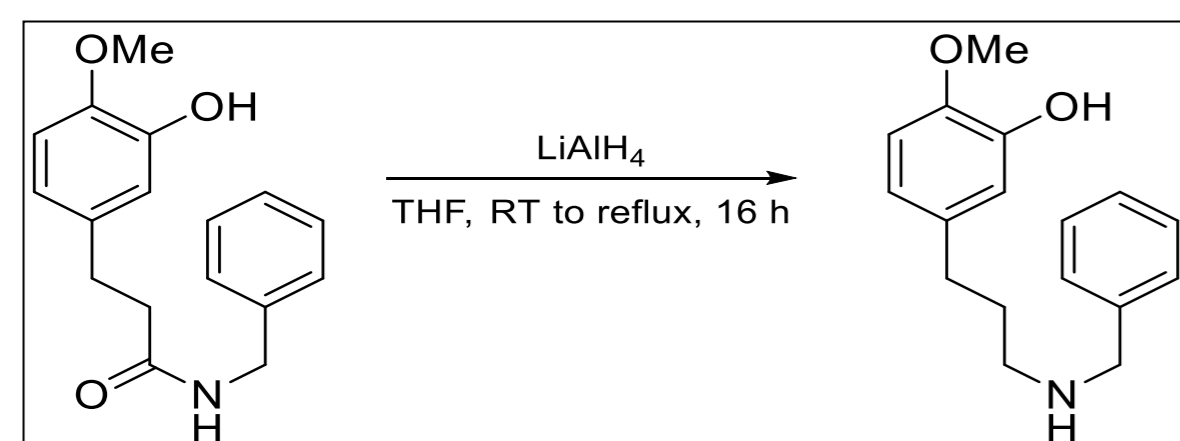

|                                   | Step   | Cumulative |
|-----------------------------------|--------|------------|
| Yield                             | 92.90  | 8.2        |
| Conversion                        | 100.0  | /          |
| Selectivity                       | 92.90  | /          |
| AE                                | 83.94  | 31.0       |
| RME                               | 69.72  | 5.20       |
| PMI total                         | 776.39 | 3147.99    |
| PMI Reaction                      | 32.70  | 385.00     |
| PMI reactants, reagents, catalyst | 1.43   | 36.74      |
| PMI reaction solvents             | 31.27  | 348.268    |
| PMI Workup                        | 743.69 | 2762.986   |
| PMI Workup chemical               | 82.86  | 258.137    |
| PMI workup solvents               | 660.83 | 2504.849   |

| Product                     | Mass | MW     | Mol  |
|-----------------------------|------|--------|------|
|                             | 8.52 | 271.36 | 0.03 |
| Unreacted limiting reactant | mass |        |      |

**Experimental:** *Angew. Chem. Int. Ed.* **2013**, *52*, 9845–9848.

To a solution of amide **13** (9.65 g, 33.8 mmol, 1.0 equiv.) in THF (200 mL) was added slowly a suspension of LiAlH<sub>4</sub> (2.57 g, 67.6 mmol, 2.0 equiv.) in THF (100 mL) at room temperature (gas evolution!). The reaction mixture was heated to reflux for 16 h. A sat. aq. solution of Rochelle's salt (500 mL) was added and the mixture stirred vigorously for 1 h. The phases were separated and the aqueous layer was extracted with EtOAc (2x 200 mL). The combined organic layers were washed with water (200 mL) and brine (200 mL), dried over MgSO<sub>4</sub> and the solvent was removed under reduced pressure. The crude product was purified by flash silica gel column chromatography (DCM/MeOH, 20:1, gradually increased to 10:1) to give secondary amine **14** (8.52 g, 31.4 mmol, 93%) as a colorless solid..

### Solvents (First Pass)

| Preferred solvents                                                                         | water, EtOH, nBuOH, AcOipr, AcOnBu, PhOMe, MeOH, tBuOH, BnOH, ethylene glycol, acetone, MEK, MIBK, AcOEt, sulfolane                                                                     | List solvents below                  |
|--------------------------------------------------------------------------------------------|-----------------------------------------------------------------------------------------------------------------------------------------------------------------------------------------|--------------------------------------|
| Problematic solvents: (acceptable only if substitution does not offer advantages)          | DMSO, cyclohexanone, DMPU, AcOH, Ac <sub>2</sub> O, Acetonitrile, AcOMe, THF, heptane, Me-cyclohexane, toluene, xylene, MTBE, cyclohexane, chlorobenzene, formic acid, pyridine, Me-THF | EtOAc, H <sub>2</sub> O, MeOH<br>THF |
| Hazardous solvents: These solvents have significant health and/or safety concerns.         | dioxane, pentane, TEA, diisopropyl ether, DME, DCM, DMF, DMA, NMP, methoxyethanol, hexane                                                                                               | DCM                                  |
| Highly hazardous solvents: The solvents which are agreed not to be used, even in screening | Et <sub>2</sub> O, Benzene, CCl <sub>4</sub> , chloroform, DCE, nitromethane, CS <sub>2</sub> , HMPA                                                                                    |                                      |

### Catalyst/enzyme (First Pass)

|                                                                                 | Green Flag | Amber Flag | Red Flag | Tick |
|---------------------------------------------------------------------------------|------------|------------|----------|------|
| Catalyst or enzyme used, or reaction takes place without any catalyst/reagents. |            |            |          |      |
| Use of stoichiometric quantities of reagents                                    |            |            |          |      |
| Use of reagents in excess                                                       |            |            |          | X    |

|                                    | Green Flag | Amber Flag | Tick |
|------------------------------------|------------|------------|------|
| Facile recovery of catalyst/enzyme |            |            |      |
| catalyst/enzyme not recovered      |            |            |      |

**Critical elements**

| Supply remaining | Flag colour | Note element |
|------------------|-------------|--------------|
| 5-50 years       | Red Flag    |              |
| 50-500 years     | Amber Flag  | Li, Al       |
| +500 years       | Green Flag  |              |

| Energy (First Pass)                          |            | Tick |
|----------------------------------------------|------------|------|
| Reaction run between 0 to 70°C               | Green Flag | X    |
| Reaction run between -20 to 0 or 70 to 140°C | Amber Flag |      |
| Reaction run below -20 or above 140°C        | Red Flag   |      |

| Batch/flow |            | Tick |
|------------|------------|------|
| Flow       | Green Flag |      |
| Batch      | Amber Flag | X    |

|                                                          |            | Tick |
|----------------------------------------------------------|------------|------|
| Reaction run at reflux                                   | Red Flag   | X    |
| Reaction run 5°C or more below the solvent boiling point | Green Flag |      |

| Work Up                                                                                                                     |            | List |
|-----------------------------------------------------------------------------------------------------------------------------|------------|------|
| quenching<br>filtration<br>centrifugation<br>crystallisation<br>Low temperature<br>distillation/evaporation/ sublimation (< | Green Flag |      |
| solvent exchange, quenching into aqueous solvent                                                                            | Amber Flag |      |
| chromatography/ion exchange<br>high temperature<br>multiple recrystallisation                                               | Red Flag   | X    |

| Health & safety                   | Red Flag                     | Amber Flag                   | Green Flag                                                 | List substances and H-codes | List substances and H-codes | List substances and H-codes |
|-----------------------------------|------------------------------|------------------------------|------------------------------------------------------------|-----------------------------|-----------------------------|-----------------------------|
| <b>Highly explosive</b>           | H200, H201, H202, H203       | H205, H220, H224             | If no red or amber flagged H codes present then green flag |                             |                             |                             |
| <b>Explosive thermal runaway</b>  | H230, H240, H250             | H241                         |                                                            |                             |                             |                             |
| <b>Toxic</b>                      | H300, H310, H330             | H301, H311, H331,            |                                                            |                             |                             |                             |
| <b>Long Term toxicity</b>         | H340, H350, H360, H370, H372 | H341, H351, H361, H371, H373 |                                                            |                             | LiAlH4 H310, H330, H340     | LiAlH4 H301, H331           |
| <b>Environmental implications</b> | H400, H410, H411, H420       | H401, H412                   |                                                            |                             |                             |                             |

| Use of chemicals of environmental concern                                            |          | List substances of very high concern |
|--------------------------------------------------------------------------------------|----------|--------------------------------------|
| Chemical identified as Substances of Very High Concern by ChemSec which are utilised | Red Flag |                                      |



## Classical approach: Step 13

Yield, AE, RME, MI/PMI and OE

| Reactant (Limiting Reactant First) | Mass (g)    | MW            | Mol  | Catalyst | Mass (g)    | Reagent             | Mass (g)    | Reaction solvent   | Volume (cm <sup>3</sup> ) | Density (g ml <sup>-1</sup> ) | Mass (g)      | Work up chemical   | Mass (g)      | Workup solvent                         | Volume (cm <sup>3</sup> ) | Density (g ml <sup>-1</sup> ) | Mass (g)       |
|------------------------------------|-------------|---------------|------|----------|-------------|---------------------|-------------|--------------------|---------------------------|-------------------------------|---------------|--------------------|---------------|----------------------------------------|---------------------------|-------------------------------|----------------|
| Amine                              | 5.50        | 271.36        | 0.02 |          |             | MeSO <sub>3</sub> H | 2.14        | CH <sub>3</sub> CN | 180.00                    | 0.79                          | 141.48        | NaHCO <sub>3</sub> | 19.20         | H <sub>2</sub> O (NaHCO <sub>3</sub> ) | 200.00                    | 1.00                          | 200.00         |
| paraformaldehyde                   | 0.67        | 30.03         | 0.07 |          |             |                     |             |                    |                           |                               | 0.00          | NaCl               | 53.85         | DCM                                    | 250.00                    | 1.33                          | 332.50         |
|                                    |             |               |      |          |             |                     |             |                    |                           |                               | 0.00          | MgSO <sub>4</sub>  | 20.30         | H <sub>2</sub> O                       | 150.00                    | 1.00                          | 150.00         |
|                                    |             |               |      |          |             |                     |             |                    |                           |                               | 0.00          | SiO <sub>2</sub>   | 162.40        | H <sub>2</sub> O (NaCl)                | 150.00                    | 1.00                          | 150.00         |
|                                    |             |               |      |          |             |                     |             |                    |                           |                               | 0.00          |                    |               | DCM                                    | 1845.00                   | 1.33                          | 2453.85        |
|                                    |             |               |      |          |             |                     |             |                    |                           |                               | 0.00          |                    |               | MeOH                                   | 185.00                    | 0.79                          | 146.52         |
|                                    |             |               |      |          |             |                     |             |                    |                           |                               | 0.00          |                    |               |                                        |                           |                               | 0.00           |
| <b>Total</b>                       | <b>6.17</b> | <b>301.39</b> |      |          | <b>0.00</b> |                     | <b>2.14</b> |                    |                           |                               | <b>141.48</b> |                    | <b>255.75</b> |                                        |                           |                               | <b>3432.87</b> |

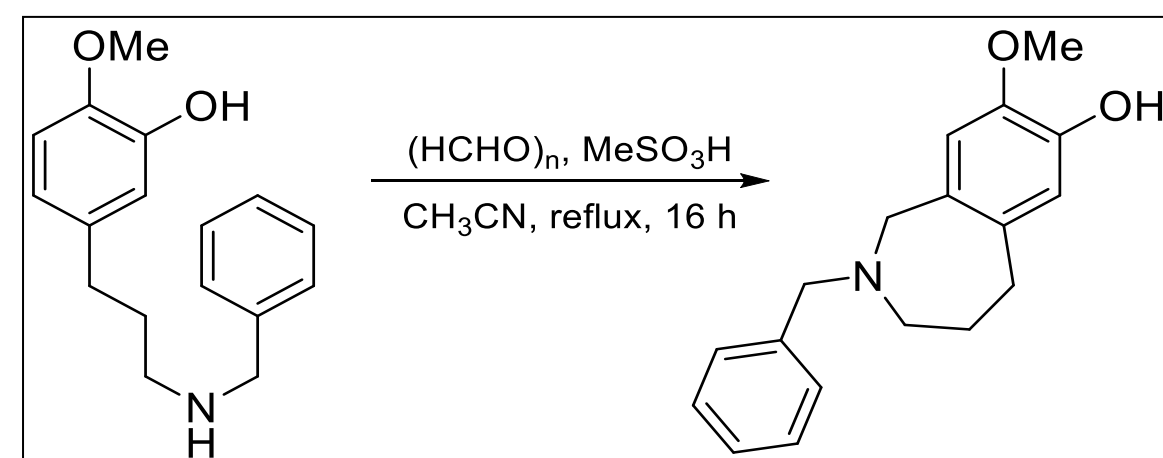

|                                   | Step   | Cumulative |
|-----------------------------------|--------|------------|
| Yield                             | 95.07  | 7.8        |
| Conversion                        | 100.0  | /          |
| Selectivity                       | 95.07  | /          |
| AE                                | 94.02  | 31.3       |
| RME                               | 88.65  | 5.13       |
| PMI total                         | 701.72 | 3865.97    |
| PMI Reaction                      | 27.38  | 413.49     |
| PMI reactants, reagents, catalyst | 1.52   | 37.45      |
| PMI reaction solvents             | 25.86  | 376.042    |
| PMI Workup                        | 674.34 | 3452.476   |
| PMI Workup chemical               | 46.76  | 306.308    |
| PMI workup solvents               | 627.58 | 3146.168   |

| Product                     | Mass | MW     | Mol  |
|-----------------------------|------|--------|------|
|                             | 5.47 | 283.37 | 0.02 |
| Unreacted limiting reactant | mass |        |      |

**Experimental:** *Angew. Chem. Int. Ed.* **2013**, *52*, 9845 –9848.

Amine **14** (5.50 g, 20.3 mmol, 1.0 equiv.) and paraformaldehyde (0.67 g, 22.3 mmol, 1.1 equiv.) were dissolved in acetonitrile (180 mL) and MeSO<sub>3</sub>H (1.45 mL, 22.3 mL, 1.1 equiv.) was added. The mixture was heated to reflux for 16 h. A saturated solution of NaHCO<sub>3</sub> (200 mL) was added and the phases were separated. The aqueous phase was extracted with DCM (5 x 50 mL) and the combined organic layers were washed with water (150 mL) and brine (150 mL), dried over MgSO<sub>4</sub> and the solvent was removed under reduced pressure. The crude product was purified by flash silica gel column chromatography (DCM/MeOH, 10:1) to give benzazepine **15** (5.47 g, 19.3 mmol, 95%) as a pale yellow solid.

Solvents (First Pass)

| Preferred solvents                                                                                | water, EtOH, nBuOH, AcOipr, AcOnBu, PhOMe, MeOH, tBuOH, BnOH, ethylene glycol, acetone, MEK, MIBK, AcOEt, sulfolane                                                                     | List solvents below                    |
|---------------------------------------------------------------------------------------------------|-----------------------------------------------------------------------------------------------------------------------------------------------------------------------------------------|----------------------------------------|
| <b>Problematic solvents:</b> (acceptable only if substitution does not offer advantages)          | DMSO, cyclohexanone, DMPU, AcOH, Ac <sub>2</sub> O, Acetonitrile, AcOMe, THF, heptane, Me-cyclohexane, toluene, xylene, MTBE, cyclohexane, chlorobenzene, formic acid, pyridine, Me-THF | H <sub>2</sub> O, MeOH<br>Acetonitrile |
| <b>Hazardous solvents:</b> These solvents have significant health and/or safety concerns.         | dioxane, pentane, TEA, diisopropyl ether, DME, DCM, DMF, DMA, NMP, methoxyethanol, hexane                                                                                               | DCM                                    |
| <b>Highly hazardous solvents:</b> The solvents which are agreed not to be used, even in screening | Et <sub>2</sub> O, Benzene, CCl <sub>4</sub> , chloroform, DCE, nitromethane, CS <sub>2</sub> , HMPA                                                                                    |                                        |

Catalyst/enzyme (First Pass)

| Catalyst or enzyme used, or reaction takes place without any catalyst/reagents. | Green Flag | Tick |
|---------------------------------------------------------------------------------|------------|------|
| Use of stoichiometric quantities of reagents                                    | Amber Flag | X    |
| Use of reagents in excess                                                       | Red Flag   |      |

| Facile recovery of catalyst/enzyme | Green Flag | Tick |
|------------------------------------|------------|------|
| catalyst/enzyme not recovered      | Amber Flag |      |

**Critical elements**

| Supply remaining | Flag colour | Note element |
|------------------|-------------|--------------|
| 5-50 years       | Red Flag    |              |
| 50-500 years     | Amber Flag  | S            |
| +500 years       | Green Flag  |              |

| Energy (First Pass)                          |            | Tick |
|----------------------------------------------|------------|------|
| Reaction run between 0 to 70°C               | Green Flag |      |
| Reaction run between -20 to 0 or 70 to 140°C | Amber Flag | X    |
| Reaction run below -20 or above 140°C        | Red Flag   |      |

| Batch/flow |            | Tick |
|------------|------------|------|
| Flow       | Green Flag |      |
| Batch      | Amber Flag | X    |

|                                                          |            | Tick |
|----------------------------------------------------------|------------|------|
| Reaction run at reflux                                   | Red Flag   | X    |
| Reaction run 5°C or more below the solvent boiling point | Green Flag |      |

| Work Up                                                                                                                                  |            | List |
|------------------------------------------------------------------------------------------------------------------------------------------|------------|------|
| quenching<br>filtration<br>centrifugation<br>crystallisation                                                                             | Green Flag |      |
| Low temperature distillation/evaporation/<br>sublimation (< 140 °C at atmospheric<br>solvent exchange, quenching into aqueous<br>solvent | Amber Flag |      |
| chromatography/ion exchange<br>high temperature<br>multiple recrystallisation                                                            | Red Flag   | X    |

**Health & safety**

|                            | Red Flag                     | Amber Flag                   | Green Flag                                                 | List substances and H-codes | List substances and H-codes | List substances and H-codes |
|----------------------------|------------------------------|------------------------------|------------------------------------------------------------|-----------------------------|-----------------------------|-----------------------------|
| Highly explosive           | H200, H201, H202, H203       | H205, H220, H224             | If no red or amber flagged H codes present then green flag |                             |                             |                             |
| Explosive thermal runaway  | H230, H240, H250             | H241                         |                                                            |                             |                             |                             |
| Toxic                      | H300, H310, H330             | H301, H311, H331,            |                                                            |                             |                             |                             |
| Long Term toxicity         | H340, H350, H360, H370, H372 | H341, H351, H361, H371, H373 |                                                            |                             | Paraformaldehyde H350       | Paraformaldehyde H341       |
| Environmental implications | H400, H410, H411, H420       | H401, H412                   |                                                            |                             |                             |                             |

**Use of chemicals of environmental concern**

|                                                                                      |          | List substances of very high concern |
|--------------------------------------------------------------------------------------|----------|--------------------------------------|
| Chemical identified as Substances of Very High Concern by ChemSec which are utilised | Red Flag |                                      |

## Sustainable approach: Step 1

Yield, AE, RME, MI/PMI and OE

| Reactant (Limiting Reactant First) | Mass (g)    | MW            | Mol      | Catalyst        | Mass (g)    | Reagent | Mass (g)    | Reaction solvent | Volume (cm <sup>3</sup> ) | Density (g ml <sup>-1</sup> ) | Mass (g)    | Work up chemical          | Mass (g)    | Workup solvent | Volume (cm <sup>3</sup> ) | Density (g ml <sup>-1</sup> ) | Mass (g)     |
|------------------------------------|-------------|---------------|----------|-----------------|-------------|---------|-------------|------------------|---------------------------|-------------------------------|-------------|---------------------------|-------------|----------------|---------------------------|-------------------------------|--------------|
| p-chloroaniline                    | 0.05        | 127.57        | 4.00E-04 | Shvo's catalyst | 4.34E-03    |         |             | CPME             | 2.00                      | 0.86                          | 1.72        | SiO <sub>2</sub> plug     | 0.80        | EtOAc          | 10.00                     | 0.90                          | 9.02         |
| Dihydroconiferyl alcohol           | 0.09        | 182.22        | 4.80E-04 |                 |             |         |             |                  |                           |                               | 0.00        | SiO <sub>2</sub> (column) | 3.20        | pentane        | 28.00                     | 0.63                          | 17.53        |
|                                    |             |               |          |                 |             |         |             |                  |                           |                               | 0.00        |                           |             | EtOAc          | 12.00                     | 0.90                          | 10.82        |
|                                    |             |               |          |                 |             |         |             |                  |                           |                               | 0.00        |                           |             |                |                           |                               | 0.00         |
|                                    |             |               |          |                 |             |         |             |                  |                           |                               | 0.00        |                           |             |                |                           |                               | 0.00         |
|                                    |             |               |          |                 |             |         |             |                  |                           |                               | 0.00        |                           |             |                |                           |                               | 0.00         |
| <b>Total</b>                       | <b>0.14</b> | <b>309.79</b> |          |                 | <b>0.00</b> |         | <b>0.00</b> |                  |                           |                               | <b>1.72</b> |                           | <b>4.00</b> |                |                           |                               | <b>37.37</b> |

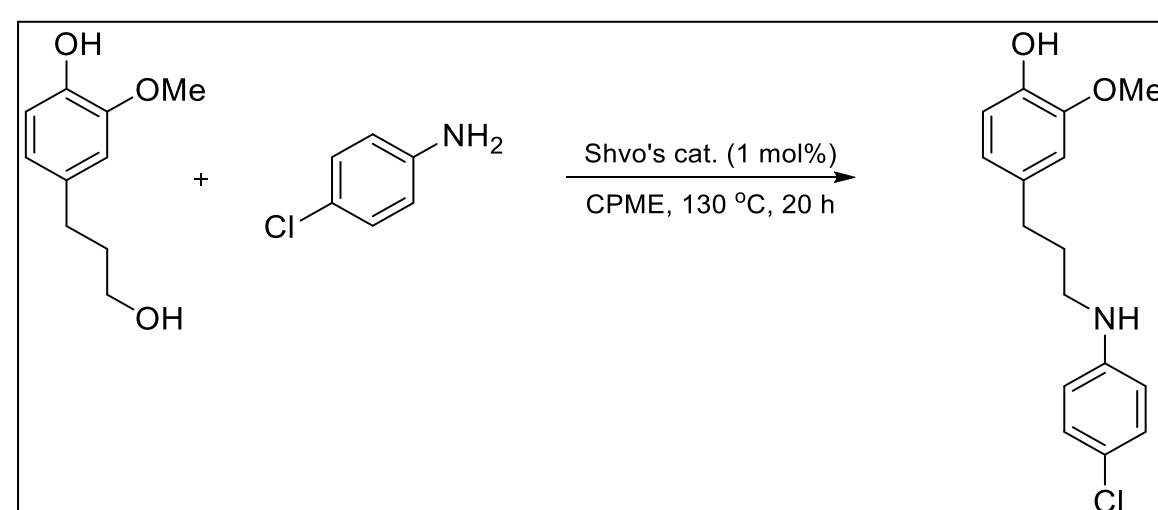

|                                   | Step   | Cumulative |
|-----------------------------------|--------|------------|
| Yield                             | 97.00  | 97.00      |
| Conversion                        | 100.0  | /          |
| Selectivity                       | 97.00  | /          |
| AE                                | 94.18  | 94.18      |
| RME                               | 81.76  | 81.76      |
| PMI total                         | 381.90 | 381.90     |
| PMI Reaction                      | 16.45  | 16.45      |
| PMI reactants, reagents, catalyst | 1.26   | 1.26       |
| PMI reaction solvents             | 15.19  | 15.19      |
| PMI Workup                        | 365.44 | 365.44     |
| PMI Workup chemical               | 35.33  | 35.33      |
| PMI workup solvents               | 330.11 | 330.11     |

| Product                     | Mass | MW     | Mol      |
|-----------------------------|------|--------|----------|
|                             | 0.11 | 291.78 | 3.88E-04 |
| Unreacted limiting reactant | mass |        |          |

**Experimental:** ACS Cent. Sci. 2019, 5, 1707–1716.

An oven-dried 20 mL Schlenk tube, equipped with a stirring bar, was charged with p-chloroaniline (0.4 mmol, 1 equiv.), **1G** (0.48 mmol, 1.2 equiv.), Shvo's catalyst (**C1**, 0.004 mmol, 1 mol%) and cyclopentyl methyl ether (CPME, 2 mL). The solid materials were weighed into the Schlenk tube under air and the Schlenk tube was subsequently connected to an argon line and vacuum-argon exchange was performed three times. Liquid starting materials and the solvent were charged under an argon stream. The Schlenk tube was capped and the mixture was rapidly stirred at room temperature for 1 min, then it was placed into a pre-heated oil bath at 130 °C and stirred for 20 h. The reaction mixture was cooled down to room temperature and the crude mixture was filtered through silica gel, eluted with ethyl acetate (10 mL), and the solvent was removed *in vacuo*. The residue was purified by flash column chromatography (70:30 = pentane : EtOAc) to provide the pure amine product (113 mg, 97% yield).

Solvents (First Pass)

|  | Preferred solvents                                                                                                  | Problematic solvents: (acceptable only if substitution does not offer advantages)                                                                                                       | Hazardous solvents: These solvents have significant health and/or safety concerns.        | Highly hazardous solvents: The solvents which are agreed not to be used, even in screening           | List solvents below      |
|--|---------------------------------------------------------------------------------------------------------------------|-----------------------------------------------------------------------------------------------------------------------------------------------------------------------------------------|-------------------------------------------------------------------------------------------|------------------------------------------------------------------------------------------------------|--------------------------|
|  | water, EtOH, nBuOH, AcOipr, AcOnBu, PhOMe, MeOH, tBuOH, BnOH, ethylene glycol, acetone, MEK, MIBK, AcOEt, sulfolane | DMSO, cyclohexanone, DMPU, AcOH, Ac <sub>2</sub> O, Acetonitrile, AcOME, THF, heptane, Me-cyclohexane, toluene, xylene, MTBE, cyclohexane, chlorobenzene, formic acid, pyridine, Me-THF | dioxane, pentane, TEA, diisopropyl ether, DME, DCM, DMF, DMA, NMP, methoxyethanol, hexane | Et <sub>2</sub> O, Benzene, CCl <sub>4</sub> , chloroform, DCE, nitromethane, CS <sub>2</sub> , HMPA | EtOAc<br>CPME<br>pentane |

Catalyst/enzyme (First Pass)

|                                                                                 | Green Flag | Amber Flag | Red Flag | Tick |
|---------------------------------------------------------------------------------|------------|------------|----------|------|
| Catalyst or enzyme used, or reaction takes place without any catalyst/reagents. |            |            |          | X    |
| Use of stoichiometric quantities of reagents                                    |            |            |          |      |
| Use of reagents in excess                                                       |            |            |          |      |

|                                    | Green Flag | Amber Flag | Tick |
|------------------------------------|------------|------------|------|
| Facile recovery of catalyst/enzyme |            |            |      |
| catalyst/enzyme not recovered      |            |            | X    |

**Critical elements**

| Supply remaining | Flag colour | Note element |
|------------------|-------------|--------------|
| 5-50 years       | Red Flag    | Ru           |
| 50-500 years     | Amber Flag  |              |
| +500 years       | Green Flag  |              |

**Energy (First Pass)**

|                                              |            | Tick |
|----------------------------------------------|------------|------|
| Reaction run between 0 to 70°C               | Green Flag |      |
| Reaction run between -20 to 0 or 70 to 140°C | Amber Flag | X    |
| Reaction run below -20 or above 140°C        | Red Flag   |      |

**Batch/flow**

|       |            | Tick |
|-------|------------|------|
| Flow  | Green Flag |      |
| Batch | Amber Flag | X    |

|                                                          |            | Tick |
|----------------------------------------------------------|------------|------|
| Reaction run at reflux                                   | Red Flag   | X    |
| Reaction run 5°C or more below the solvent boiling point | Green Flag |      |

**Work Up**

|                                                                                                                                          |            | List |
|------------------------------------------------------------------------------------------------------------------------------------------|------------|------|
| quenching<br>filtration<br>centrifugation<br>crystallisation                                                                             | Green Flag |      |
| Low temperature distillation/evaporation/<br>sublimation (< 140 °C at atmospheric<br>solvent exchange, quenching into aqueous<br>solvent | Amber Flag |      |
| chromatography/ion exchange<br>high temperature<br>multiple recrystallisation                                                            | Red Flag   | X    |

**Health & safety**

|                                   | Red Flag                     | Amber Flag                   | Green Flag                                                 | List substances and H-codes | List substances and H-codes | List substances and H-codes       |
|-----------------------------------|------------------------------|------------------------------|------------------------------------------------------------|-----------------------------|-----------------------------|-----------------------------------|
| <b>Highly explosive</b>           | H200, H201, H202, H203       | H205, H220, H224             | If no red or amber flagged H codes present then green flag |                             |                             |                                   |
| <b>Explosive thermal runaway</b>  | H230, H240, H250             | H241                         |                                                            |                             |                             | dihydroconiferyl alcohol: H351    |
| <b>Toxic</b>                      | H300, H310, H330             | H301, H311, H331,            |                                                            |                             |                             | p-chloroaniline: H301, H311, H331 |
| <b>Long Term toxicity</b>         | H340, H350, H360, H370, H372 | H341, H351, H361, H371, H373 |                                                            |                             |                             |                                   |
| <b>Environmental implications</b> | H400, H410, H411, H420       | H401, H412                   |                                                            |                             | p-chloroaniline: H400, H350 | p-chloroaniline: H412             |

**Use of chemicals of environmental concern**

|                                                                                      |          | List substances of very high concern |
|--------------------------------------------------------------------------------------|----------|--------------------------------------|
| Chemical identified as Substances of Very High Concern by ChemSec which are utilised | Red Flag |                                      |

## Sustainable approach: Step 2

Yield, AE, RME, MI/PMI and OE

| Reactant (Limiting Reactant First) | Mass (g)    | MW            | Mol      | Catalyst | Mass (g)    | Reagent          | Mass (g)    | Reaction solvent | Volume (cm <sup>3</sup> ) | Density (g ml <sup>-1</sup> ) | Mass (g)    | Work up chemical   | Mass (g)    | Workup solvent                         | Volume (cm <sup>3</sup> ) | Density (g ml <sup>-1</sup> ) | Mass (g)     |
|------------------------------------|-------------|---------------|----------|----------|-------------|------------------|-------------|------------------|---------------------------|-------------------------------|-------------|--------------------|-------------|----------------------------------------|---------------------------|-------------------------------|--------------|
| aminoalkylphenol                   | 0.10        | 291.78        | 3.43E-04 |          |             | ChCl:Oxalic acid | 1.00        |                  |                           |                               | 0.00        | NaHCO <sub>3</sub> | 0.19        | H <sub>2</sub> O                       | 2.00                      | 1.00                          | 2.00         |
| paraformaldehyde                   | 0.01        | 30.03         | 3.43E-04 |          |             |                  |             |                  |                           |                               | 0.00        | SiO <sub>2</sub>   | 2.74        | H <sub>2</sub> O (NaHCO <sub>3</sub> ) | 2.00                      | 1.00                          | 2.00         |
|                                    |             |               |          |          |             |                  |             |                  |                           |                               | 0.00        |                    |             | EtOAc                                  | 30.00                     | 0.90                          | 27.06        |
|                                    |             |               |          |          |             |                  |             |                  |                           |                               | 0.00        |                    |             | EtOAc (column)                         | 13.72                     | 0.90                          | 12.38        |
|                                    |             |               |          |          |             |                  |             |                  |                           |                               | 0.00        |                    |             | pentane (column)                       | 20.58                     | 0.63                          | 12.88        |
|                                    |             |               |          |          |             |                  |             |                  |                           |                               | 0.00        |                    |             |                                        |                           |                               | 0.00         |
|                                    |             |               |          |          |             |                  |             |                  |                           |                               | 0.00        |                    |             |                                        |                           |                               | 0.00         |
| <b>Total</b>                       | <b>0.11</b> | <b>321.81</b> |          |          | <b>0.00</b> |                  | <b>1.00</b> |                  |                           |                               | <b>0.00</b> |                    | <b>2.94</b> |                                        |                           |                               | <b>56.32</b> |

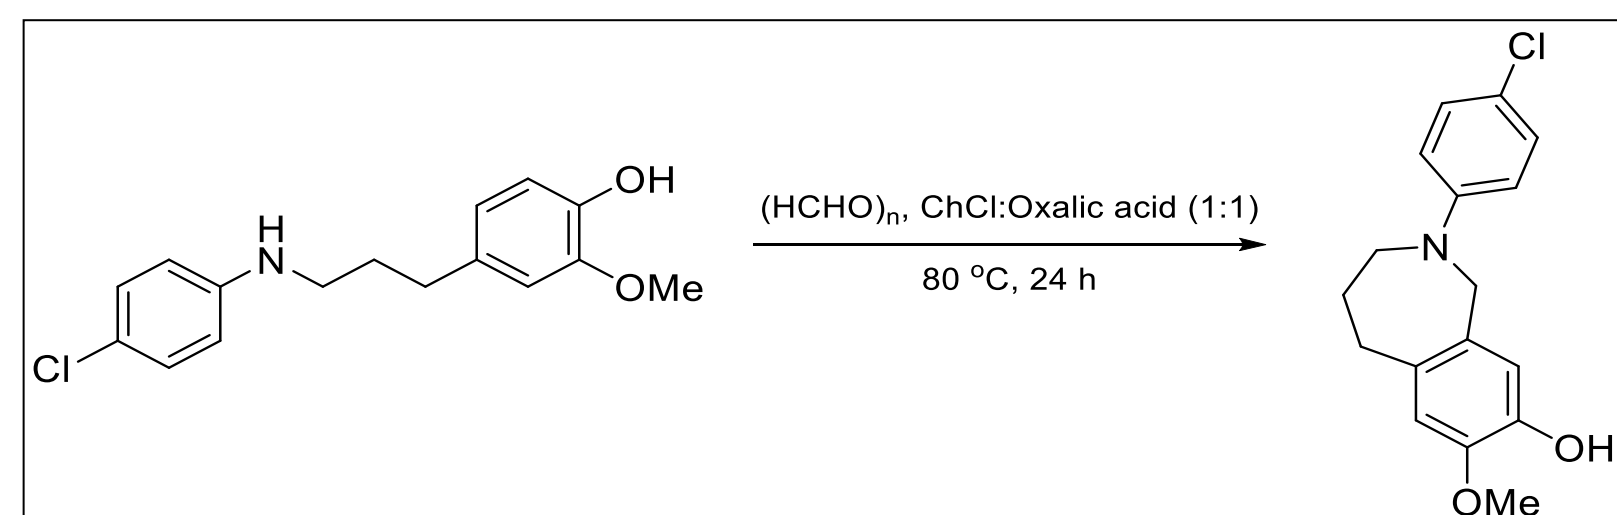

|                                   | Step   | Cumulative |
|-----------------------------------|--------|------------|
| Yield                             | 87.00  | 84.4       |
| Conversion                        | 100.0  | /          |
| Selectivity                       | 87.00  | /          |
| AE                                | 94.40  | 89.4       |
| RME                               | 82.44  | 68.57      |
| PMI total                         | 663.35 | 1082.25    |
| PMI Reaction                      | 12.20  | 29.20      |
| PMI reactants, reagents, catalyst | 12.20  | 12.49      |
| PMI reaction solvents             | 0.00   | 16.709     |
| PMI Workup                        | 651.15 | 1053.053   |
| PMI Workup chemical               | 32.26  | 71.121     |
| PMI workup solvents               | 618.88 | 981.932    |

| Product                     | Mass | MW     | Mol      |
|-----------------------------|------|--------|----------|
|                             | 0.09 | 303.79 | 2.98E-04 |
| Unreacted limiting reactant | mass |        |          |

**Experimental:** ACS Cent. Sci. 2019, 5, 1707–1716.

An oven-dried vial equipped with a stirring bar, was charged with aminoalkylphenol (0.343 mmol), paraformaldehyde (0.343 mmol) and ChCl/Oxalic acid (1:1 molar ratio, 1g) under air. Then the vial was capped and the mixture was rapidly stirred at room temperature for 1 min, then it was heated to 70 °C and stirred for 20 h. The reaction mixture was cooled down to room temperature, water (2 mL) and saturated solution of NaHCO<sub>3</sub> (2 mL) was added and then the reaction mixture was stirred for one hour at room temperature. The crude mixture was extracted with ethyl acetate (3 × 10 mL) and the solvent was removed *in vacuo*. The residue was purified by flash column chromatography (pentane : ethyl acetate = 60:40) affording the target product (91 mg, 87% yield).

Solvents (First Pass)

| Preferred solvents                                                                         | water, EtOH, nBuOH, AcOipr, AcOnBu, PhOMe, MeOH, tBuOH, BnOH, ethylene glycol, acetone, MEK, MIBK, AcOEt, sulfolane                                                                     | List solvents below     |
|--------------------------------------------------------------------------------------------|-----------------------------------------------------------------------------------------------------------------------------------------------------------------------------------------|-------------------------|
| Problematic solvents: (acceptable only if substitution does not offer advantages)          | DMSO, cyclohexanone, DMPU, AcOH, Ac <sub>2</sub> O, Acetonitrile, AcOMe, THF, heptane, Me-cyclohexane, toluene, xylene, MTBE, cyclohexane, chlorobenzene, formic acid, pyridine, Me-THF | H <sub>2</sub> O, EtOAc |
| Hazardous solvents: These solvents have significant health and/or safety concerns.         | dioxane, pentane, TEA, diisopropyl ether, DME, DCM, DMF, DMA, NMP, methoxyethanol, hexane                                                                                               | pentane                 |
| Highly hazardous solvents: The solvents which are agreed not to be used, even in screening | Et <sub>2</sub> O, Benzene, CCl <sub>4</sub> , chloroform, DCE, nitromethane, CS <sub>2</sub> , HMPA                                                                                    |                         |

Catalyst/enzyme (First Pass)

| Catalyst or enzyme used, or reaction takes place without any catalyst/reagents. | Green Flag | Tick |
|---------------------------------------------------------------------------------|------------|------|
| Use of stoichiometric quantities of reagents                                    | Amber Flag | X    |
| Use of reagents in excess                                                       | Red Flag   |      |

| Facile recovery of catalyst/enzyme | Green Flag | Tick |
|------------------------------------|------------|------|
| catalyst/enzyme not recovered      | Amber Flag | X    |

**Critical elements**

| Supply remaining | Flag colour | Note element |
|------------------|-------------|--------------|
| 5-50 years       | Red Flag    |              |
| 50-500 years     | Amber Flag  |              |
| +500 years       | Green Flag  | X            |

**Energy (First Pass)**

|                                              |            | Tick |
|----------------------------------------------|------------|------|
| Reaction run between 0 to 70°C               | Green Flag | X    |
| Reaction run between -20 to 0 or 70 to 140°C | Amber Flag |      |
| Reaction run below -20 or above 140°C        | Red Flag   |      |

**Batch/flow**

|       |            | Tick |
|-------|------------|------|
| Flow  | Green Flag |      |
| Batch | Amber Flag | X    |

|                                                          |            | Tick |
|----------------------------------------------------------|------------|------|
| Reaction run at reflux                                   | Red Flag   |      |
| Reaction run 5°C or more below the solvent boiling point | Green Flag | X    |

**Work Up**

|                                                                                                                                                             |            | List |
|-------------------------------------------------------------------------------------------------------------------------------------------------------------|------------|------|
| quenching<br>filtration<br>centrifugation<br>crystallisation<br>Low temperature distillation/evaporation/<br>sublimation (< 140 °C at atmospheric pressure) | Green Flag |      |
| solvent exchange, quenching into aqueous solvent                                                                                                            | Amber Flag |      |
| chromatography/ion exchange<br>high temperature<br>multiple recrystallisation                                                                               | Red Flag   | X    |

**Health & safety**

|                                   | Red Flag                     | Amber Flag                   | Green Flag                                                 | List substances and H-codes | List substances and H-codes | List substances and H-codes |
|-----------------------------------|------------------------------|------------------------------|------------------------------------------------------------|-----------------------------|-----------------------------|-----------------------------|
| <b>Highly explosive</b>           | H200, H201, H202, H203       | H205, H220, H224             | If no red or amber flagged H codes present then green flag |                             |                             |                             |
| <b>Explosive thermal runaway</b>  | H230, H240, H250             | H241                         |                                                            |                             |                             |                             |
| <b>Toxic</b>                      | H300, H310, H330             | H301, H311, H331,            |                                                            |                             |                             |                             |
| <b>Long Term toxicity</b>         | H340, H350, H360, H370, H372 | H341, H351, H361, H371, H373 |                                                            |                             | Paraformaldehyde H350       | Paraformaldehyde H341       |
| <b>Environmental implications</b> | H400, H410, H411, H420       | H401, H412                   |                                                            |                             |                             |                             |

**Use of chemicals of environmental concern**

|                                                                                      |          | List substances of very high concern |
|--------------------------------------------------------------------------------------|----------|--------------------------------------|
| Chemical identified as Substances of Very High Concern by ChemSec which are utilised | Red Flag |                                      |

## Classical pathway: Step 1

Yield, AE, RME, MI/PMI and OE

| Reactant (Limiting Reactant First) | Mass (g)      | MW           | Mol  | Catalyst                                            | Mass (g)    | Reagent | Mass (g)    | Reaction solvent | Volume (cm <sup>3</sup> ) | Density (g ml <sup>-1</sup> ) | Mass (g)    | Work up chemical | Mass (g)    | Workup solvent | Volume (cm3) | Density (g ml <sup>-1</sup> ) | Mass (g)    |
|------------------------------------|---------------|--------------|------|-----------------------------------------------------|-------------|---------|-------------|------------------|---------------------------|-------------------------------|-------------|------------------|-------------|----------------|--------------|-------------------------------|-------------|
| furfural                           | 200.00        | 96.08        | 2.08 | Cu <sub>2</sub> Cr <sub>2</sub> O <sub>5</sub> cat. | 1.50        |         |             |                  |                           |                               | 0.00        |                  |             |                |              |                               | 0.00        |
| hydrogen gas                       | 8.48          | 2.01         | 4.22 |                                                     |             |         |             |                  |                           |                               | 0.00        |                  |             |                |              |                               | 0.00        |
|                                    |               |              |      |                                                     |             |         |             |                  |                           |                               | 0.00        |                  |             |                |              |                               | 0.00        |
|                                    |               |              |      |                                                     |             |         |             |                  |                           |                               | 0.00        |                  |             |                |              |                               | 0.00        |
| <b>Total</b>                       | <b>208.48</b> | <b>98.09</b> |      |                                                     | <b>1.50</b> |         | <b>0.00</b> |                  |                           |                               | <b>0.00</b> |                  | <b>0.00</b> |                |              |                               | <b>0.00</b> |

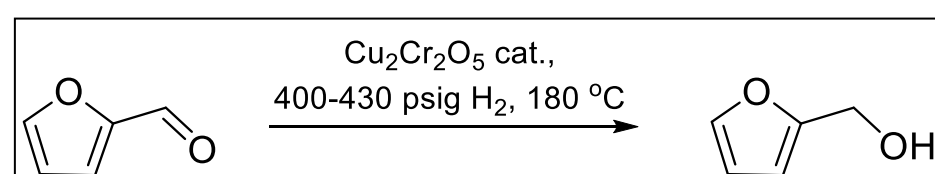

|                                   | Step  | Cumulative |
|-----------------------------------|-------|------------|
| Yield                             | 97.1  | 97.1       |
| Conversion                        | 98.3  | /          |
| Selectivity                       | 98.8  | /          |
| AE                                | 100.0 | 100.0      |
| RME                               | 95.1  | 95.1       |
| PMI total                         | 1.1   | 1.1        |
| PMI Reaction                      | 1.1   | 1.1        |
| PMI reactants, reagents, catalyst | 1.1   | 1.1        |
| PMI reaction solvents             | 0.0   | 0.0        |
| PMI Workup                        | 0.0   | 0.0        |
| PMI Workup chemical               | 0.0   | 0.0        |
| PMI workup solvents               | 0.0   | 0.0        |

|                             | Mass   | MW    | Mol  |
|-----------------------------|--------|-------|------|
| Product                     | 198.20 | 98.10 | 2.02 |
|                             | mass   |       |      |
| Unreacted limiting reactant | 3.45   |       |      |

**Experimental:** Leo J. Frainier, Herman H. Fineberg, United States Pat. US4251396A, 1981

Furfuryl alcohol was prepared from furfural using the copper chromite catalyst of this invention. The copper chromite catalyst used was prepared as described in Examples 1 and 2. The furfuryl alcohol was prepared in a 300 milliliter AE autoclave. The autoclave was thoroughly cleaned and dried. It was then charged with 200 grams of furfural, 1.5 grams of a copper chromite catalyst prepared as described in Examples 1 and 2, and 1 gram of calcium oxide. The furfural (freshly distilled) was obtained from Profursa, a Spanish concern. Fisher technical calcium oxide was used. The autoclave was pressurized to 400 to 430 psig with hydrogen. The temperature was raised and maintained at 180° C. After five and a third hours, 98.3% of the furfural was converted. The selectivity of the converted furfural to furfuryl alcohol was 98.8%.

### Solvents (First Pass)

|                                                                                                   |                                                                                                                                                                                         | List solvents below |
|---------------------------------------------------------------------------------------------------|-----------------------------------------------------------------------------------------------------------------------------------------------------------------------------------------|---------------------|
| <b>Preferred solvents</b>                                                                         | water, EtOH, nBuOH, AcOipr, AcOnBu, PhOMe, MeOH, tBuOH, BnOH, ethylene glycol, acetone, MEK, MIBK, AcOEt, sulfolane                                                                     |                     |
| <b>Problematic solvents:</b> (acceptable only if substitution does not offer advantages)          | DMSO, cyclohexanone, DMPU, AcOH, Ac <sub>2</sub> O, Acetonitrile, AcOMe, THF, heptane, Me-cyclohexane, toluene, xylene, MTBE, cyclohexane, chlorobenzene, formic acid, pyridine, Me-THF |                     |
| <b>Hazardous solvents:</b> These solvents have significant health and/or safety concerns.         | dioxane, pentane, TEA, diisopropyl ether, DME, DCM, DMF, DMA, NMP, methoxyethanol, hexane                                                                                               |                     |
| <b>Highly hazardous solvents:</b> The solvents which are agreed not to be used, even in screening | Et <sub>2</sub> O, Benzene, CCl <sub>4</sub> , chloroform, DCE, nitromethane, CS <sub>2</sub> , HMPA                                                                                    |                     |

### Catalyst/enzyme (First Pass)

|                                                                                 |            | Tick |
|---------------------------------------------------------------------------------|------------|------|
| Catalyst or enzyme used, or reaction takes place without any catalyst/reagents. | Green Flag | x    |
| Use of stoichiometric quantities of reagents                                    | Amber Flag |      |
| Use of reagents in excess                                                       | Red Flag   |      |

|                                    |            | Tick |
|------------------------------------|------------|------|
| Facile recovery of catalyst/enzyme | Green Flag |      |
| catalyst/enzyme not recovered      | Amber Flag |      |

**Critical elements**

| Supply remaining | Flag colour | Note element |
|------------------|-------------|--------------|
| 5-50 years       | Red Flag    |              |
| 50-500 years     | Amber Flag  | Cu, Cr       |
| +500 years       | Green Flag  |              |

**Energy (First Pass)**

|                                              |            | Tick |
|----------------------------------------------|------------|------|
| Reaction run between 0 to 70°C               | Green Flag |      |
| Reaction run between -20 to 0 or 70 to 140°C | Amber Flag |      |
| Reaction run below -20 or above 140°C        | Red Flag   | X    |

**Batch/flow**

|       |            | Tick |
|-------|------------|------|
| Flow  | Green Flag |      |
| Batch | Amber Flag | X    |

|                                                          |            | Tick |
|----------------------------------------------------------|------------|------|
| Reaction run at reflux                                   | Red Flag   | X    |
| Reaction run 5°C or more below the solvent boiling point | Green Flag |      |

**Work Up**

|                                                                                                                                          |            | List |
|------------------------------------------------------------------------------------------------------------------------------------------|------------|------|
| quenching<br>filtration<br>centrifugation<br>crystallisation                                                                             | Green Flag | X    |
| Low temperature distillation/evaporation/<br>sublimation (< 140 °C at atmospheric<br>solvent exchange, quenching into aqueous<br>solvent | Amber Flag |      |
| chromatography/ion exchange<br>high temperature<br>multiple recrystallisation                                                            | Red Flag   |      |

**Health & safety**

|                                   | Red Flag                     | Amber Flag                   | Green Flag                                                 | List substances and H-codes                                           | List substances and H-codes | List substances and H-codes |
|-----------------------------------|------------------------------|------------------------------|------------------------------------------------------------|-----------------------------------------------------------------------|-----------------------------|-----------------------------|
| <b>Highly explosive</b>           | H200, H201, H202, H203       | H205, H220, H224             | If no red or amber flagged H codes present then green flag | furfural H226 - H301 - H312 - H315 - H319 - H330 - H335 - H351 - H412 | Hydrogen gas H220 - H280    |                             |
| <b>Explosive thermal runaway</b>  | H230, H240, H250             | H241                         |                                                            | Copper chromite H272 - H335 - H410                                    |                             |                             |
| <b>Toxic</b>                      | H300, H310, H330             | H301, H311, H331,            |                                                            |                                                                       |                             |                             |
| <b>Long Term toxicity</b>         | H340, H350, H360, H370, H372 | H341, H351, H361, H371, H373 |                                                            |                                                                       |                             |                             |
| <b>Environmental implications</b> | H400, H410, H411, H420       | H401, H412                   |                                                            |                                                                       |                             |                             |

**Use of chemicals of environmental concern**

|                                                                                      |          | List substances of very high concern |
|--------------------------------------------------------------------------------------|----------|--------------------------------------|
| Chemical identified as Substances of Very High Concern by ChemSec which are utilised | Red Flag |                                      |



## Classical pathway: Step 2

Yield, AE, RME, MI/PMI and OE

| Reactant (Limiting Reactant First) | Mass (g)      | MW            | Mol  | Catalyst | Mass (g)    | Reagent | Mass (g)    | Reaction solvent | Volume (cm <sup>3</sup> ) | Density (g ml <sup>-1</sup> ) | Mass (g)      | Work up chemical | Mass (g)       | Workup solvent | Volume (cm <sup>3</sup> ) | Density (g ml <sup>-1</sup> ) | Mass (g)       |
|------------------------------------|---------------|---------------|------|----------|-------------|---------|-------------|------------------|---------------------------|-------------------------------|---------------|------------------|----------------|----------------|---------------------------|-------------------------------|----------------|
| furfuryl alcohol                   | 153.00        | 98.10         | 1.56 |          |             |         |             | ethanol          | 600.00                    | 0.79                          | 474.00        | Na2CO3           | 86.00          | water          | 500.00                    | 1.00                          | 500.00         |
| dimethylamine hydrochloride        | 128.00        | 81.54         | 1.57 |          |             |         |             |                  |                           |                               | 0.00          | MgSO4            | 1560.00        | diethyl-ether  | 1500.00                   | 0.71                          | 1065.00        |
| paraformaldehyde                   | 140.00        | 30.03         | 4.66 |          |             |         |             |                  |                           |                               | 0.00          |                  |                |                |                           |                               | 0.00           |
|                                    |               |               |      |          |             |         |             |                  |                           |                               | 0.00          |                  |                |                |                           |                               | 0.00           |
|                                    |               |               |      |          |             |         |             |                  |                           |                               | 0.00          |                  |                |                |                           |                               | 0.00           |
|                                    |               |               |      |          |             |         |             |                  |                           |                               | 0.00          |                  |                |                |                           |                               | 0.00           |
| <b>Total</b>                       | <b>421.00</b> | <b>209.67</b> |      |          | <b>0.00</b> |         | <b>0.00</b> |                  |                           |                               | <b>474.00</b> |                  | <b>1646.00</b> |                |                           |                               | <b>1565.00</b> |

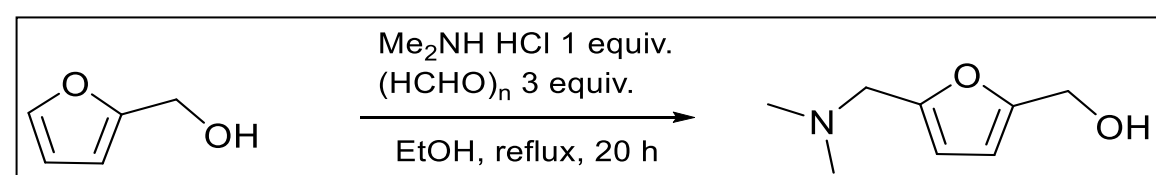

|                                   | Step  | Cumulative |
|-----------------------------------|-------|------------|
| Yield                             | 43.4  | 42.1       |
| Conversion                        | 100.0 | /          |
| Selectivity                       | 43.4  | /          |
| AE                                | 74.0  | 74.0       |
| RME                               | 24.9  | 24.48      |
| PMI total                         | 39.1  | 39.19      |
| PMI Reaction                      | 8.5   | 8.61       |
| PMI reactants, reagents, catalyst | 4.0   | 4.10       |
| PMI reaction solvents             | 4.5   | 4.514      |
| PMI Workup                        | 30.6  | 30.581     |
| PMI Workup chemical               | 15.7  | 15.676     |
| PMI workup solvents               | 14.9  | 14.905     |

| Product                     | Mass   | MW     | Mol  |
|-----------------------------|--------|--------|------|
|                             | 105.00 | 155.19 | 0.68 |
| Unreacted limiting reactant | mass   |        |      |
|                             | 0.00   |        |      |

**Experimental:** S. Hirai, H. Hirano, H. Arai, Y. Kiba, H. Shibata, Y. Kusayanagi, M. Yotsuji, K. Hashiba and K. Tanada, *US Patent* 4643849, 1987

With 600 ml of ethanol were mixed 153 g of furfuryl alcohol, 128 g of dimethylamine hydrochloride and 70 g of paraformaldehyde, and the resulting mixture was subjected to reaction under reflux for 2 hours. Thereafter, 70 g of paraformaldehyde was further added, and the mixture thus obtained was subjected to reaction under reflux for 18 hours. After completion of the reaction, the solvent was removed by distillation under reduced pressure, and 500 ml of water and 86 g of anhydrous sodium carbonate were added to the resulting residue. The oily substance separated was extracted with three 500-ml portions of diethyl ether, and the extracts were combined and then dried over anhydrous magnesium sulfate, after which the solvent was removed by distillation under reduced pressure. The oily substance thus obtained was distilled under reduced pressure to obtain 105 g (yield 43.4%) of 5-(dimethylamino)methyl-2-furfuryl alcohol having a boiling point of 128.degree.-133.degree. C./15 mmHg.

### Solvents (First Pass)

| Preferred solvents                                                                         | water, EtOH, nBuOH, AcOipr, AcOnBu, PhOMe, MeOH, tBuOH, BnOH, ethylene glycol, acetone, MEK, MIBK, AcOEt, sulfolane                                                        | List solvents below |
|--------------------------------------------------------------------------------------------|----------------------------------------------------------------------------------------------------------------------------------------------------------------------------|---------------------|
| Problematic solvents: (acceptable only if substitution does not offer advantages)          | DMSO, cyclohexanone, DMPU, AcOH, Ac2O, Acetonitrile, AcOMe, THF, heptane, Me-cyclohexane, toluene, xylene, MTBE, cyclohexane, chlorobenzene, formic acid, pyridine, Me-THF | ethanol, water      |
| Hazardous solvents: These solvents have significant health and/or safety concerns.         | dioxane, pentane, TEA, diisopropyl ether, DME, DCM, DMF, DMA, NMP, methoxyethanol, hexane                                                                                  |                     |
| Highly hazardous solvents: The solvents which are agreed not to be used, even in screening | Et <sub>2</sub> O, Benzene, CCl <sub>4</sub> , chloroform, DCE, nitromethane, CS <sub>2</sub> , HMPA                                                                       | diethyl-ether       |

### Catalyst/enzyme (First Pass)

|                                                                                 |            | Tick |
|---------------------------------------------------------------------------------|------------|------|
| Catalyst or enzyme used, or reaction takes place without any catalyst/reagents. | Green Flag |      |
| Use of stoichiometric quantities of reagents                                    | Amber Flag |      |
| Use of reagents in excess                                                       | Red Flag   | X    |

|                                    |            | Tick |
|------------------------------------|------------|------|
| Facile recovery of catalyst/enzyme | Green Flag |      |
| catalyst/enzyme not recovered      | Amber Flag |      |

**Critical elements**

| Supply remaining | Flag colour | Note element |
|------------------|-------------|--------------|
| 5-50 years       | Red Flag    |              |
| 50-500 years     | Amber Flag  |              |
| +500 years       | Green Flag  | x            |

| Energy (First Pass)                          |            | Tick |
|----------------------------------------------|------------|------|
| Reaction run between 0 to 70°C               | Green Flag |      |
| Reaction run between -20 to 0 or 70 to 140°C | Amber Flag | X    |
| Reaction run below -20 or above 140°C        | Red Flag   |      |

| Batch/flow |            | Tick |
|------------|------------|------|
| Flow       | Green Flag |      |
| Batch      | Amber Flag | X    |

|                                                          |            | Tick |
|----------------------------------------------------------|------------|------|
| Reaction run at reflux                                   | Red Flag   | X    |
| Reaction run 5°C or more below the solvent boiling point | Green Flag |      |

| Work Up                                                                                                                                  |            | List |
|------------------------------------------------------------------------------------------------------------------------------------------|------------|------|
| quenching<br>filtration<br>centrifugation<br>crystallisation                                                                             | Green Flag | X    |
| Low temperature distillation/evaporation/<br>sublimation (< 140 °C at atmospheric<br>solvent exchange, quenching into aqueous<br>solvent | Amber Flag | X    |
| chromatography/ion exchange<br>high temperature<br>multiple recrystallisation                                                            | Red Flag   |      |

| Health & safety                   | Red Flag                     | Amber Flag                   | Green Flag                                                 | List substances and H-codes                                                   | List substances and H-codes                                     | List substances and H-codes                    |
|-----------------------------------|------------------------------|------------------------------|------------------------------------------------------------|-------------------------------------------------------------------------------|-----------------------------------------------------------------|------------------------------------------------|
| <b>Highly explosive</b>           | H200, H201, H202, H203       | H205, H220, H224             | If no red or amber flagged H codes present then green flag | paraformaldehyde H228 - H302 + H332 - H315 - H317 - H318 - H335 - H341 - H350 | furfuryl alcohol H302 + H312 - H319 - H331 - H335 - H351 - H373 | dimethylamine hydrochloride H302 - H315 - H319 |
| <b>Explosive thermal runaway</b>  | H230, H240, H250             | H241                         |                                                            | ethanol H225 - H319                                                           |                                                                 |                                                |
| <b>Toxic</b>                      | H300, H310, H330             | H301, H311, H331,            |                                                            | diethyl-ether H224, H302, H336                                                |                                                                 |                                                |
| <b>Long Term toxicity</b>         | H340, H350, H360, H370, H372 | H341, H351, H361, H371, H373 |                                                            |                                                                               |                                                                 |                                                |
| <b>Environmental implications</b> | H400, H410, H411, H420       | H401, H412                   |                                                            |                                                                               |                                                                 |                                                |

| Use of chemicals of environmental concern                                            |          | List substances of very high concern |
|--------------------------------------------------------------------------------------|----------|--------------------------------------|
| Chemical identified as Substances of Very High Concern by ChemSec which are utilised | Red Flag |                                      |

## Classical pathway: Step 3

Yield, AE, RME, MI/PMI and OE

| Reactant (Limiting Reactant First)         | Mass (g)     | MW            | Mol    | Catalyst | Mass (g)    | Reagent | Mass (g)    | Reaction solvent | Volume (cm <sup>3</sup> ) | Density (g ml <sup>-1</sup> ) | Mass (g)     | Work up chemical | Mass (g)     | Workup solvent | Volume (cm3) | Density (g ml <sup>-1</sup> ) | Mass (g)      |
|--------------------------------------------|--------------|---------------|--------|----------|-------------|---------|-------------|------------------|---------------------------|-------------------------------|--------------|------------------|--------------|----------------|--------------|-------------------------------|---------------|
| 5-(dimethylamino)methyl-2-furfuryl alcohol | 15.50        | 155.19        | 0.0999 |          |             |         |             | HCl              | 40.00                     | 1.49                          | 59.60        | Na2CO3           | 16.00        | diethyl-ether  | 500.00       | 0.71                          | 355.00        |
| cysteamine hydrochloride                   | 11.36        | 113.61        | 0.1000 |          |             |         |             |                  |                           |                               | 0.00         |                  |              |                |              |                               | 0.00          |
|                                            |              |               |        |          |             |         |             |                  |                           |                               | 0.00         |                  |              |                |              |                               | 0.00          |
|                                            |              |               |        |          |             |         |             |                  |                           |                               | 0.00         |                  |              |                |              |                               | 0.00          |
|                                            |              |               |        |          |             |         |             |                  |                           |                               | 0.00         |                  |              |                |              |                               | 0.00          |
|                                            |              |               |        |          |             |         |             |                  |                           |                               | 0.00         |                  |              |                |              |                               | 0.00          |
| <b>Total</b>                               | <b>26.86</b> | <b>268.80</b> |        |          | <b>0.00</b> |         | <b>0.00</b> |                  |                           |                               | <b>59.60</b> |                  | <b>16.00</b> |                |              |                               | <b>355.00</b> |

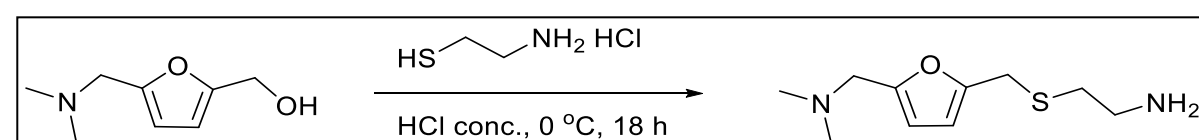

|                                   | Step  | Cumulative |
|-----------------------------------|-------|------------|
| Yield                             | 54.2  | 22.8       |
| Conversion                        | 100.0 | /          |
| Selectivity                       | 54.2  | /          |
| AE                                | 79.7  | 66.3       |
| RME                               | 43.2  | 15.53      |
| PMI total                         | 39.4  | 90.47      |
| PMI Reaction                      | 7.5   | 17.62      |
| PMI reactants, reagents, catalyst | 2.3   | 6.45       |
| PMI reaction solvents             | 5.1   | 11.170     |
| PMI Workup                        | 32.0  | 72.845     |
| PMI Workup chemical               | 1.4   | 22.326     |
| PMI workup solvents               | 30.6  | 50.519     |

| Product                     | Mass  | MW     | Mol  |
|-----------------------------|-------|--------|------|
|                             | 11.60 | 214.32 | 0.05 |
|                             | mass  |        |      |
| Unreacted limiting reactant | 0.00  |        |      |

### Experimental:

B. J. Price, J. W. Clitherow and J. Bradshaw, US Patent 4128658, 1978

#### 2-[[[5-(Dimethylamino)methyl-2-furanyl]methyl]thio]ethanamine

5-(Dimethylamino)methyl-2-furanmethanol (15.5 g) was added dropwise to a stirred, ice-cold solution of cysteamine hydrochloride (11.36 g) in concentrated hydrochloric acid (40 ml). After standing at 0° for 18 hr, excess anhydrous sodium carbonate was added and the resultant solid extracted with diethyl ether. Removal of solvent followed by distillation of the residue gave 2-[[[5-(dimethylamino)methyl-2-furanyl]methyl]thio]ethanamine (11.6 g) b.p. 104–106° (0.1 mm). Picrate salt m.p. 142–144°.

### Solvents (First Pass)

| Preferred solvents                                                                                | water, EtOH, nBuOH, AcOipr, AcOnBu, PhOMe, MeOH, tBuOH, BnOH, ethylene glycol, acetone, MEK, MIBK, AcOEt, sulfolane                                                     | List solvents below |
|---------------------------------------------------------------------------------------------------|-------------------------------------------------------------------------------------------------------------------------------------------------------------------------|---------------------|
| <b>Problematic solvents:</b> (acceptable only if substitution does not offer advantages)          | DMSO, cyclohexanone, DMPU, AcOH, Ac2O, Acetonitrile, AcOMe, THF, heptane, Me-cyclohexane, toluene, xylene, MTBE, cyclohexane, chlorobenzene, formic acid, pyridine, Me- | water               |
| <b>Hazardous solvents:</b> These solvents have significant health and/or safety concerns          | dioxane, pentane, TEA, diisopropyl ether, DME, DCM, DMF, DMA, NMP, methoxyethanol, hexane                                                                               |                     |
| <b>Highly hazardous solvents:</b> The solvents which are agreed not to be used, even in screening | Et <sub>2</sub> O, Benzene, CCl <sub>4</sub> , chloroform, DCE, nitromethane, CS <sub>2</sub> , HMPA                                                                    | Et2O                |

### Catalyst/enzyme (First Pass)

|                                                                                 |            | Tick |
|---------------------------------------------------------------------------------|------------|------|
| Catalyst or enzyme used, or reaction takes place without any catalyst/reagents. | Green Flag |      |
| Use of stoichiometric quantities of reagents                                    | Amber Flag | x    |
| Use of reagents in excess                                                       | Red Flag   |      |

|                                    |            | Tick |
|------------------------------------|------------|------|
| Facile recovery of catalyst/enzyme | Green Flag |      |
| catalyst/enzyme not recovered      | Amber Flag |      |

**Critical elements**

| Supply remaining | Flag colour | Note element |
|------------------|-------------|--------------|
| 5-50 years       | Red Flag    |              |
| 50-500 years     | Amber Flag  | S            |
| +500 years       | Green Flag  |              |

**Energy (First Pass)**

|                                              |            | Tick |
|----------------------------------------------|------------|------|
| Reaction run between 0 to 70°C               | Green Flag | x    |
| Reaction run between -20 to 0 or 70 to 140°C | Amber Flag |      |
| Reaction run below -20 or above 140°C        | Red Flag   |      |

**Batch/flow**

|       |            | Tick |
|-------|------------|------|
| Flow  | Green Flag |      |
| Batch | Amber Flag | x    |

|                                                          |            | Tick |
|----------------------------------------------------------|------------|------|
| Reaction run at reflux                                   | Red Flag   |      |
| Reaction run 5°C or more below the solvent boiling point | Green Flag | x    |

**Work Up**

|                                                                                                                                          |            | List |
|------------------------------------------------------------------------------------------------------------------------------------------|------------|------|
| quenching<br>filtration<br>centrifugation<br>crystallisation                                                                             | Green Flag | x    |
| Low temperature distillation/evaporation/<br>sublimation (< 140 °C at atmospheric<br>solvent exchange, quenching into aqueous<br>solvent | Amber Flag |      |
| chromatography/ion exchange<br>high temperature<br>multiple recrystallisation                                                            | Red Flag   |      |

**Health & safety**

|                                   | Red Flag                     | Amber Flag                   | Green Flag                                                 | List substances and H-codes | List substances and H-codes | List substances and H-codes                     |
|-----------------------------------|------------------------------|------------------------------|------------------------------------------------------------|-----------------------------|-----------------------------|-------------------------------------------------|
| <b>Highly explosive</b>           | H200, H201, H202, H203       | H205, H220, H224             | If no red or amber flagged H codes present then green flag |                             |                             | cysteamine hydrochloride H302, H317, H319, H335 |
| <b>Explosive thermal runaway</b>  | H230, H240, H250             | H241                         |                                                            |                             |                             | hydrochloric acid H290 - H314 - H335            |
| <b>Toxic</b>                      | H300, H310, H330             | H301, H311, H331,            |                                                            |                             |                             | Diethyl ether H224 - H302 - H336                |
| <b>Long Term toxicity</b>         | H340, H350, H360, H370, H372 | H341, H351, H361, H371, H373 |                                                            |                             |                             |                                                 |
| <b>Environmental implications</b> | H400, H410, H411, H420       | H401, H412                   |                                                            |                             |                             |                                                 |

**Use of chemicals of environmental concern**

|                                                                                      |          | List substances of very high concern |
|--------------------------------------------------------------------------------------|----------|--------------------------------------|
| Chemical identified as Substances of Very High Concern by ChemSec which are utilised | Red Flag |                                      |

## Classical pathway: Step 4

Yield, AE, RME, MI/PMI and OE

| Reactant (Limiting Reactant First)                         | Mass (g)      | MW            | Mol  | Catalyst | Mass (g)    | Reagent | Mass (g)    | Reaction solvent | Volume (cm <sup>3</sup> ) | Density (g ml <sup>-1</sup> ) | Mass (g)      | Work up chemical | Mass (g)     | Workup solvent       | Volume (cm3) | Density (g ml <sup>-1</sup> ) | Mass (g)       |
|------------------------------------------------------------|---------------|---------------|------|----------|-------------|---------|-------------|------------------|---------------------------|-------------------------------|---------------|------------------|--------------|----------------------|--------------|-------------------------------|----------------|
| 2-[[5-(dimethylamino)methyl-2-furyl]-methylthio]ethanamine | 321.00        | 214.32        | 1.50 |          |             |         |             | water            | 400.00                    | 1.00                          | 400.00        | charcoal         | 10.00        | 4-Methyl-2-pentanone | 2000.00      | 0.80                          | 1600.00        |
| N-Methyl-1-(methylthio)-2-nitroethanamine                  | 230.00        | 148.18        | 1.55 |          |             |         |             |                  |                           |                               | 0.00          |                  |              |                      |              |                               | 0.00           |
|                                                            |               |               |      |          |             |         |             |                  |                           |                               | 0.00          |                  |              |                      |              |                               | 0.00           |
|                                                            |               |               |      |          |             |         |             |                  |                           |                               | 0.00          |                  |              |                      |              |                               | 0.00           |
|                                                            |               |               |      |          |             |         |             |                  |                           |                               | 0.00          |                  |              |                      |              |                               | 0.00           |
|                                                            |               |               |      |          |             |         |             |                  |                           |                               | 0.00          |                  |              |                      |              |                               | 0.00           |
| <b>Total</b>                                               | <b>551.00</b> | <b>362.50</b> |      |          | <b>0.00</b> |         | <b>0.00</b> |                  |                           |                               | <b>400.00</b> |                  | <b>10.00</b> |                      |              |                               | <b>1600.00</b> |

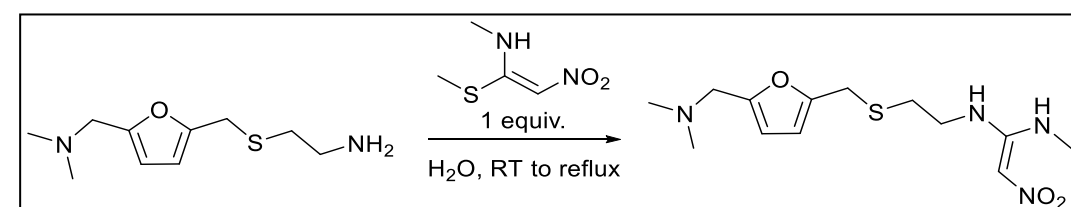

|                                   | Step  | Cumulative |
|-----------------------------------|-------|------------|
| Yield                             | 80.7  | 18.4       |
| Conversion                        | 100.0 | /          |
| Selectivity                       | 80.7  | /          |
| AE                                | 86.7  | 66.7       |
| RME                               | 69.0  | 16.55      |
| PMI total                         | 6.7   | 82.32      |
| PMI Reaction                      | 2.5   | 16.54      |
| PMI reactants, reagents, catalyst | 1.5   | 6.06       |
| PMI reaction solvents             | 1.1   | 10.488     |
| PMI Workup                        | 4.2   | 65.772     |
| PMI Workup chemical               | 0.0   | 18.886     |
| PMI workup solvents               | 4.2   | 46.886     |

|                             | Mass   | MW     | Mol  |
|-----------------------------|--------|--------|------|
| Product                     | 380.00 | 314.40 | 1.21 |
|                             | mass   |        |      |
| Unreacted limiting reactant | 0.00   |        |      |

### Experimental:

B. J. Price, J. W. Clitherow and J. Bradshaw, US Patent 4128658, 1978.

#### N-2-[[[5-(Dimethylamino)methyl-2-furanyl]methyl]thio]ethyl]-N'-methyl-2-nitro-1,1-ethenediamine

N-Methyl-1-(methylthio)-2-nitroethanamine (230 g) in water (400 ml) was stirred and heated at 45°-50°. 2-[[[5-(Dimethylamino) methyl-2-furanyl]methyl]thio]ethanamine (321 g) was added dropwise over 4 hr and the resultant solution stirred for a further 3½ hr. The solution was then heated at reflux for ½ hr, cooled to 70° and 4-methylpentan-2-one (2 liters) added. The water was removed by azeotropic distillation under reduced

pressure (260 torr) and the resultant solution treated with charcoal (10 g) at 50°. The solution was filtered and cooled to 10°. N-2-[[[5-(dimethylamino)methyl-2-furanyl]methyl]thio]ethyl]-N'-methyl-2-nitro-1,1-ethenediamine (380 g) was filtered off and dried m.p. 69°-70°.

### Solvents (First Pass)

| Preferred solvents                                                                         | water, EtOH, nBuOH, AcOipr, AcOnBu, PhOMe, MeOH, tBuOH, BnOH, ethylene glycol, acetone, MEK, MIBK, AcOEt, sulfolane                                                        | List solvents below         |
|--------------------------------------------------------------------------------------------|----------------------------------------------------------------------------------------------------------------------------------------------------------------------------|-----------------------------|
| Problematic solvents: (acceptable only if substitution does not offer advantages)          | DMSO, cyclohexanone, DMPU, AcOH, Ac2O, Acetonitrile, AcOMe, THF, heptane, Me-cyclohexane, toluene, xylene, MTBE, cyclohexane, chlorobenzene, formic acid, pyridine, Me-THF | Water, 4-Methyl-2-pentanone |
| Hazardous solvents: These solvents have significant health and/or safety concerns.         | dioxane, pentane, TEA, diisopropyl ether, DME, DCM, DMF, DMA, NMP, methoxyethanol, hexane                                                                                  |                             |
| Highly hazardous solvents: The solvents which are agreed not to be used, even in screening | Et <sub>2</sub> O, Benzene, CCl <sub>4</sub> , chloroform, DCE, nitromethane, CS <sub>2</sub> , HMPA                                                                       |                             |

| Catalyst/enzyme (First Pass)                                                    |            | Tick |
|---------------------------------------------------------------------------------|------------|------|
| Catalyst or enzyme used, or reaction takes place without any catalyst/reagents. | Green Flag |      |
| Use of stoichiometric quantities of reagents                                    | Amber Flag | x    |
| Use of reagents in excess                                                       | Red Flag   |      |

|                                    |            | Tick |
|------------------------------------|------------|------|
| Facile recovery of catalyst/enzyme | Green Flag |      |
| catalyst/enzyme not recovered      | Amber Flag |      |

#### Critical elements

| Supply remaining | Flag colour | Note element |
|------------------|-------------|--------------|
| 5-50 years       | Red Flag    |              |
| 50-500 years     | Amber Flag  | S            |
| +500 years       | Green Flag  |              |

| Energy (First Pass)                          |            | Tick |
|----------------------------------------------|------------|------|
| Reaction run between 0 to 70°C               | Green Flag |      |
| Reaction run between -20 to 0 or 70 to 140°C | Amber Flag | X    |
| Reaction run below -20 or above 140°C        | Red Flag   |      |

|                                                          |            | Tick |
|----------------------------------------------------------|------------|------|
| Reaction run at reflux                                   | Red Flag   | x    |
| Reaction run 5°C or more below the solvent boiling point | Green Flag |      |

| Batch/flow |            | Tick |
|------------|------------|------|
| Flow       | Green Flag |      |
| Batch      | Amber Flag | X    |

| Work Up                                                                                                                                  |            | List |
|------------------------------------------------------------------------------------------------------------------------------------------|------------|------|
| quenching<br>filtration<br>centrifugation<br>crystallisation                                                                             | Green Flag | x    |
| Low temperature distillation/evaporation/<br>sublimation (< 140 °C at atmospheric<br>solvent exchange, quenching into aqueous<br>solvent | Amber Flag |      |
| chromatography/ion exchange<br>high temperature<br>multiple recrystallisation                                                            | Red Flag   |      |

#### Health & safety

|                            | Red Flag                     | Amber Flag                   | Green Flag                                                 | List substances and H-codes | List substances and H-codes | List substances and H-codes                         |
|----------------------------|------------------------------|------------------------------|------------------------------------------------------------|-----------------------------|-----------------------------|-----------------------------------------------------|
| Highly explosive           | H200, H201, H202, H203       | H205, H220, H224             | If no red or amber flagged H codes present then green flag |                             |                             | N-Methyl-1-methylthio-2-nitroethenamine H315 - H319 |
| Explosive thermal runaway  | H230, H240, H250             | H241                         |                                                            |                             |                             | 4-Methyl-2-pentanone H225 - H319 - H332 - H335      |
| Toxic                      | H300, H310, H330             | H301, H311, H331,            |                                                            |                             |                             |                                                     |
| Long Term toxicity         | H340, H350, H360, H370, H372 | H341, H351, H361, H371, H373 |                                                            |                             |                             |                                                     |
| Environmental implications | H400, H410, H411, H420       | H401, H412                   |                                                            |                             |                             |                                                     |

| Use of chemicals of environmental concern                                            | Red Flag | List substances of very high concern |
|--------------------------------------------------------------------------------------|----------|--------------------------------------|
| Chemical identified as Substances of Very High Concern by ChemSec which are utilised | Red Flag |                                      |

## Alternative approach: Step A

Yield, AE, RME, MI/PMI and OE

| Reactant (Limiting Reactant First) | Mass (g)      | MW            | Mol     | Catalyst | Mass (g)    | Reagent | Mass (g)    | Reaction solvent | Volume (cm <sup>3</sup> ) | Density (g ml <sup>-1</sup> ) | Mass (g)     | Work up chemical | Mass (g)     | Workup solvent | Volume (cm <sup>3</sup> ) | Density (g ml <sup>-1</sup> ) | Mass (g)      |
|------------------------------------|---------------|---------------|---------|----------|-------------|---------|-------------|------------------|---------------------------|-------------------------------|--------------|------------------|--------------|----------------|---------------------------|-------------------------------|---------------|
| 5-(chloromethyl)furfural           | 0.4912        | 144.55        | 0.00340 |          |             | NaH     | 0.10300     | THF              | 30.00                     | 0.88                          | 26.40        | NaCl             | 54.00        | water (brine)  | 150.00                    | 1.00                          | 150.00        |
| N-acetylcysteamine                 | 0.4051        | 119.19        | 0.00340 |          |             |         |             |                  |                           |                               | 0.00         | Na2SO4           | 3.40         | DCM            | 100.00                    | 1.33                          | 133.00        |
|                                    |               |               |         |          |             |         |             |                  |                           |                               | 0.00         | charcoal         | 0.10         |                |                           |                               | 0.00          |
|                                    |               |               |         |          |             |         |             |                  |                           |                               | 0.00         |                  |              |                |                           |                               | 0.00          |
|                                    |               |               |         |          |             |         |             |                  |                           |                               | 0.00         |                  |              |                |                           |                               | 0.00          |
|                                    |               |               |         |          |             |         |             |                  |                           |                               | 0.00         |                  |              |                |                           |                               | 0.00          |
| <b>Total</b>                       | <b>0.8963</b> | <b>263.74</b> |         |          | <b>0.00</b> |         | <b>0.10</b> |                  |                           |                               | <b>26.40</b> |                  | <b>57.50</b> |                |                           |                               | <b>283.00</b> |

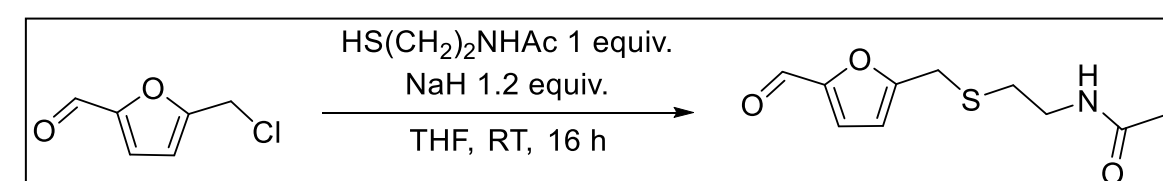

|                                   | Step  | Cumulative |
|-----------------------------------|-------|------------|
| Yield                             | 91.2  | 91.2       |
| Conversion                        | 100.0 | 100.0      |
| Selectivity                       | 91.2  | 91.2       |
| AE                                | 86.2  | 86.2       |
| RME                               | 78.6  | 78.6       |
| PMI total                         | 522.4 | 522.4      |
| PMI Reaction                      | 38.9  | 38.9       |
| PMI reactants, reagents, catalyst | 1.4   | 1.4        |
| PMI reaction solvents             | 37.5  | 37.5       |
| PMI Workup                        | 483.5 | 483.5      |
| PMI Workup chemical               | 81.7  | 81.7       |
| PMI workup solvents               | 401.9 | 401.9      |

|                             | Mass    | MW     | Mol     |
|-----------------------------|---------|--------|---------|
| Product                     | 0.70420 | 227.27 | 0.00310 |
|                             | mass    |        |         |
| Unreacted limiting reactant | 0.00    |        |         |

### Experimental:

Mark Mascal, Saikat Dutta, Green Chem., 2011, 13, 3101

Sodium hydride (95%) (103 mg, 4.08 mmol) was added to a solution of Nacetylcysteamine (0.4051 g, 3.40 mmol) in dry THF (20 mL) under argon. The resulting suspension was stirred at RT for 30 min and a solution of CMF **12** (0.4912 g, 3.40 mmol) in dry THF (10 mL) was added dropwise over a 10 min period. The resulting light yellow solution was allowed to stir overnight at RT. The solvent was evaporated and saturated brine (50 mL) was added. The mixture was extracted with CH<sub>2</sub>Cl<sub>2</sub> (2 × 50 mL) and the organic layers were combined and washed with saturated brine (100 mL). The organic layer was dried over Na<sub>2</sub>SO<sub>4</sub>. Charcoal (100 mg) was added and the mixture was stirred for 20 min and filtered. The solvent was evaporated to give **14** as a yellow liquid (0.7042 g, 91 %).

### Solvents (First Pass)

|                                                                                                   | List solvents below                                                                                                                                                                             |
|---------------------------------------------------------------------------------------------------|-------------------------------------------------------------------------------------------------------------------------------------------------------------------------------------------------|
| <b>Preferred solvents</b>                                                                         | water, EtOH, nBuOH, AcOipr, AcOnBu, PhOMe, MeOH, tBuOH, BnOH, ethylene glycol, acetone, MEK, MIBK, <b>AcOEt</b> , sulfolane                                                                     |
| <b>Problematic solvents:</b> (acceptable only if substitution does not offer advantages)          | DMSO, cyclohexanone, DMPU, AcOH, Ac <sub>2</sub> O, Acetonitrile, AcOMe, THF, heptane, Me-cyclohexane, toluene, xylene, MTBE, <b>cyclohexane</b> , chlorobenzene, formic acid, pyridine, Me-THF |
| <b>Hazardous solvents:</b> These solvents have significant health and/or safety concerns.         | dioxane, pentane, TEA, diisopropyl ether, DME, DCM, DMF, DMA, NMP, methoxyethanol, hexane                                                                                                       |
| <b>Highly hazardous solvents:</b> The solvents which are agreed not to be used, even in screening | Et <sub>2</sub> O, Benzene, CCl <sub>4</sub> , chloroform, DCE, nitromethane, CS <sub>2</sub> , HMPA                                                                                            |

### Catalyst/enzyme (First Pass)

|                                                                                 | Green Flag | Amber Flag | Red Flag | Tick |
|---------------------------------------------------------------------------------|------------|------------|----------|------|
| Catalyst or enzyme used, or reaction takes place without any catalyst/reagents. |            |            |          |      |
| Use of stoichiometric quantities of reagents                                    |            |            |          | x    |
| Use of reagents in excess                                                       |            |            |          |      |

|                                    | Green Flag | Amber Flag | Tick |
|------------------------------------|------------|------------|------|
| Facile recovery of catalyst/enzyme |            |            |      |
| catalyst/enzyme not recovered      |            |            |      |

**Critical elements**

| Supply remaining | Flag colour | Note element |
|------------------|-------------|--------------|
| 5-50 years       | Red Flag    |              |
| 50-500 years     | Amber Flag  | S            |
| +500 years       | Green Flag  |              |

| Energy (First Pass)                          |            | Tick |
|----------------------------------------------|------------|------|
| Reaction run between 0 to 70°C               | Green Flag | x    |
| Reaction run between -20 to 0 or 70 to 140°C | Amber Flag |      |
| Reaction run below -20 or above 140°C        | Red Flag   |      |

| Batch/flow |            | Tick |
|------------|------------|------|
| Flow       | Green Flag |      |
| Batch      | Amber Flag |      |

|                                                          |            | Tick |
|----------------------------------------------------------|------------|------|
| Reaction run at reflux                                   | Red Flag   |      |
| Reaction run 5°C or more below the solvent boiling point | Green Flag | x    |

| Work Up                                                                                                                                  |            | List |
|------------------------------------------------------------------------------------------------------------------------------------------|------------|------|
| quenching<br>filtration<br>centrifugation<br>crystallisation                                                                             | Green Flag |      |
| Low temperature distillation/evaporation/<br>sublimation (< 140 °C at atmospheric<br>solvent exchange, quenching into aqueous<br>solvent | Amber Flag | x    |
| chromatography/ion exchange<br>high temperature<br>multiple recrystallisation                                                            | Red Flag   |      |

**Health & safety**

|                                   | Red Flag                     | Amber Flag                   | Green Flag                                                 | List substances and H-codes | List substances and H-codes                 | List substances and H-codes                         |                                       |
|-----------------------------------|------------------------------|------------------------------|------------------------------------------------------------|-----------------------------|---------------------------------------------|-----------------------------------------------------|---------------------------------------|
| <b>Highly explosive</b>           | H200, H201, H202, H203       | H205, H220, H224             | If no red or amber flagged H codes present then green flag |                             | THF H225 - H302 - H319 - H335 - H336 - H351 | NaH H228 - H260 - H290 - H314                       |                                       |
| <b>Explosive thermal runaway</b>  | H230, H240, H250             | H241                         |                                                            |                             |                                             | 5-Chloromethylfurfural H227, H302, H314, H318, H351 | N-Acetylcysteamine H315 - H319 - H335 |
| <b>Toxic</b>                      | H300, H310, H330             | H301, H311, H331,            |                                                            |                             |                                             |                                                     |                                       |
| <b>Long Term toxicity</b>         | H340, H350, H360, H370, H372 | H341, H351, H361, H371, H373 |                                                            |                             |                                             |                                                     |                                       |
| <b>Environmental implications</b> | H400, H410, H411, H420       | H401, H412                   |                                                            |                             |                                             |                                                     |                                       |

**Use of chemicals of environmental concern**

|                                                                                      | Red Flag | List substances of very high concern |
|--------------------------------------------------------------------------------------|----------|--------------------------------------|
| Chemical identified as Substances of Very High Concern by ChemSec which are utilised | Red Flag |                                      |



## Alternative approach: Step B

Yield, AE, RME, MI/PMI and OE

| Reactant (Limiting Reactant First)                                 | Mass (g)      | MW            | Mol     | Catalyst | Mass (g)    | Reagent | Mass (g)    | Reaction solvent | Volume (cm <sup>3</sup> ) | Density (g ml <sup>-1</sup> ) | Mass (g)     | Work up chemical | Mass (g)    | Workup solvent | Volume (cm <sup>3</sup> ) | Density (g ml <sup>-1</sup> ) | Mass (g)     |
|--------------------------------------------------------------------|---------------|---------------|---------|----------|-------------|---------|-------------|------------------|---------------------------|-------------------------------|--------------|------------------|-------------|----------------|---------------------------|-------------------------------|--------------|
| 5-[[[2-Acetamidoethyl]thio]methyl]-N,N-dimethyl-2-furanmethanamine | 0.2105        | 227.27        | 0.00093 |          |             |         |             | MeOH             | 20.00                     | 0.79                          | 15.80        |                  |             | DCM            | 50.00                     | 1.33                          | 66.50        |
| Dimethylamine                                                      | 0.67          | 45.08         | 0.01486 |          |             |         |             |                  |                           |                               | 0.00         |                  |             |                |                           |                               | 0.00         |
| NaBH <sub>4</sub>                                                  | 0.06          | 37.83         | 0.00159 |          |             |         |             |                  |                           |                               | 0.00         |                  |             |                |                           |                               | 0.00         |
|                                                                    |               |               |         |          |             |         |             |                  |                           |                               | 0.00         |                  |             |                |                           |                               | 0.00         |
|                                                                    |               |               |         |          |             |         |             |                  |                           |                               | 0.00         |                  |             |                |                           |                               | 0.00         |
|                                                                    |               |               |         |          |             |         |             |                  |                           |                               | 0.00         |                  |             |                |                           |                               | 0.00         |
| <b>Total</b>                                                       | <b>0.9405</b> | <b>310.18</b> |         |          | <b>0.00</b> |         | <b>0.00</b> |                  |                           |                               | <b>15.80</b> |                  | <b>0.00</b> |                |                           |                               | <b>66.50</b> |

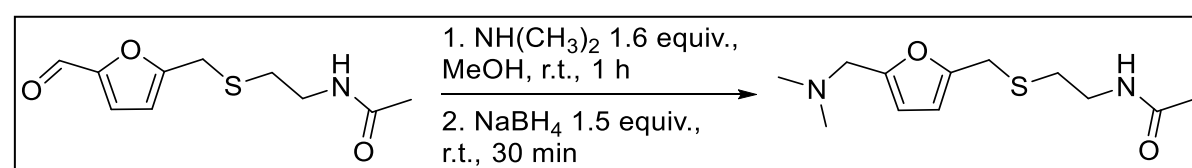

|                                   | Step  | Cumulative |
|-----------------------------------|-------|------------|
| Yield                             | 90.3  | 82.4       |
| Conversion                        | 100.0 | /          |
| Selectivity                       | 90.3  | /          |
| AE                                | 82.6  | 74.0       |
| RME                               | 22.8  | 21.49      |
| PMI total                         | 388.1 | 899.78     |
| PMI Reaction                      | 78.0  | 115.25     |
| PMI reactants, reagents, catalyst | 4.4   | 4.80       |
| PMI reaction solvents             | 73.7  | 110.450    |
| PMI Workup                        | 310.0 | 784.534    |
| PMI Workup chemical               | 0.0   | 80.130     |
| PMI workup solvents               | 310.0 | 704.404    |

|                             | Mass   | MW     | Mol     |
|-----------------------------|--------|--------|---------|
| Product                     | 0.2145 | 256.36 | 0.00084 |
|                             | mass   |        |         |
| Unreacted limiting reactant | 0.00   |        |         |

### Experimental:

Mark Mascal, Saikat Dutta, Green Chem., 2011, 13, 3101

Me<sub>2</sub>NH (1.0 mL) was added to a solution of 14 (0.2105 g, 0.926 mmol) in dry methanol (20 mL) and the mixture was stirred at RT for 1 h. The resulting red solution was cooled to 0 °C and NaBH<sub>4</sub> (98 %) (55 mg, 1.42 mmol) was added over a 5 min period. The mixture was allowed to come to RT and stirred for 30 min. The solvent was evaporated while keeping the bath temperature below 45 °C. The residue was dissolved in CH<sub>2</sub>Cl<sub>2</sub> (50 mL) and filtered to remove inorganic impurities. The solvent was evaporated to give 15 (0.2145 g, 90 %) as a pale yellow oil.

### Solvents (First Pass)

| Preferred solvents                                                                         | water, EtOH, nBuOH, AcOipr, AcOnBu, PhOMe, MeOH, tBuOH, BnOH, ethylene glycol, acetone, MEK, MIBK, AcOEt, sulfolane                                                                     | List solvents below |
|--------------------------------------------------------------------------------------------|-----------------------------------------------------------------------------------------------------------------------------------------------------------------------------------------|---------------------|
| Problematic solvents: (acceptable only if substitution does not offer advantages)          | DMSO, cyclohexanone, DMPU, AcOH, Ac <sub>2</sub> O, Acetonitrile, AcOMe, THF, heptane, Me-cyclohexane, toluene, xylene, MTBE, cyclohexane, chlorobenzene, formic acid, pyridine, Me-THF | MeOH                |
| Hazardous solvents: These solvents have significant health and/or safety concerns.         | dioxane, pentane, TEA, diisopropyl ether, DME, DCM, DMF, DMA, NMP, methoxyethanol, hexane                                                                                               | DCM                 |
| Highly hazardous solvents: The solvents which are agreed not to be used, even in screening | Et <sub>2</sub> O, Benzene, CCl <sub>4</sub> , chloroform, DCE, nitromethane, CS <sub>2</sub> , HMPA                                                                                    |                     |

| Catalyst/enzyme (First Pass)                                                    |            | Tick |
|---------------------------------------------------------------------------------|------------|------|
| Catalyst or enzyme used, or reaction takes place without any catalyst/reagents. | Green Flag |      |
| Use of stoichiometric quantities of reagents                                    | Amber Flag | x    |
| Use of reagents in excess                                                       | Red Flag   |      |

|                                    |            | Tick |
|------------------------------------|------------|------|
| Facile recovery of catalyst/enzyme | Green Flag |      |
| catalyst/enzyme not recovered      | Amber Flag |      |

#### Critical elements

| Supply remaining | Flag colour | Note element |
|------------------|-------------|--------------|
| 5-50 years       | Red Flag    |              |
| 50-500 years     | Amber Flag  | S, B         |
| +500 years       | Green Flag  |              |

| Energy (First Pass)                          |            | Tick |
|----------------------------------------------|------------|------|
| Reaction run between 0 to 70°C               | Green Flag | x    |
| Reaction run between -20 to 0 or 70 to 140°C | Amber Flag |      |
| Reaction run below -20 or above 140°C        | Red Flag   |      |

|                                                          |            | Tick |
|----------------------------------------------------------|------------|------|
| Reaction run at reflux                                   | Red Flag   |      |
| Reaction run 5°C or more below the solvent boiling point | Green Flag | x    |

| Batch/flow |            | Tick |
|------------|------------|------|
| Flow       | Green Flag |      |
| Batch      | Amber Flag | X    |

| Work Up                                                                                                                                  |            | List |
|------------------------------------------------------------------------------------------------------------------------------------------|------------|------|
| quenching<br>filtration<br>centrifugation<br>crystallisation                                                                             | Green Flag | x    |
| Low temperature distillation/evaporation/<br>sublimation (< 140 °C at atmospheric<br>solvent exchange, quenching into aqueous<br>solvent | Amber Flag |      |
| chromatography/ion exchange<br>high temperature<br>multiple recrystallisation                                                            | Red Flag   |      |

| Health & safety            | Red Flag                     | Amber Flag                   | Green Flag                                                 | List substances and H-codes          | List substances and H-codes                             | List substances and H-codes |
|----------------------------|------------------------------|------------------------------|------------------------------------------------------------|--------------------------------------|---------------------------------------------------------|-----------------------------|
| Highly explosive           | H200, H201, H202, H203       | H205, H220, H224             | If no red or amber flagged H codes present then green flag | DCM H225 - H301 + H311 + H331 - H370 | Dimethylamine H220 - H280 - H315 - H318 - H332 - H335 - |                             |
| Explosive thermal runaway  | H230, H240, H250             | H241                         |                                                            | NaBH4 H260 - H301 - H314 - H360FD    |                                                         |                             |
| Toxic                      | H300, H310, H330             | H301, H311, H331,            |                                                            | x                                    |                                                         |                             |
| Long Term toxicity         | H340, H350, H360, H370, H372 | H341, H351, H361, H371, H373 |                                                            |                                      |                                                         |                             |
| Environmental implications | H400, H410, H411, H420       | H401, H412                   |                                                            |                                      |                                                         |                             |

| Use of chemicals of environmental concern                                            | Red Flag | List substances of very high concern |
|--------------------------------------------------------------------------------------|----------|--------------------------------------|
| Chemical identified as Substances of Very High Concern by ChemSec which are utilised | Red Flag |                                      |

## Alternative approach: Step C

Yield, AE, RME, MI/PMI and OE

| Reactant (Limiting Reactant First)                             | Mass (g)      | MW            | Mol     | Catalyst | Mass (g)    | Reagent | Mass (g)    | Reaction solvent | Volume (cm <sup>3</sup> ) | Density (g ml <sup>-1</sup> ) | Mass (g)     | Work up chemical | Mass (g)    | Workup solvent | Volume (cm <sup>3</sup> ) | Density (g ml <sup>-1</sup> ) | Mass (g)      |
|----------------------------------------------------------------|---------------|---------------|---------|----------|-------------|---------|-------------|------------------|---------------------------|-------------------------------|--------------|------------------|-------------|----------------|---------------------------|-------------------------------|---------------|
| 5-[[[2-aminoethyl)thio)methyl]-N,N-dimethyl-2-furanmethanamine | 0.2473        | 256.36        | 0.00096 |          |             | NaOH    | 0.80        | water            | 10.00                     | 1.00                          | 10.00        | NaCl (brine)     | 2.00        | DCM            | 90.00                     | 1.33                          | 119.70        |
|                                                                |               |               |         |          |             |         |             |                  |                           |                               | 0.00         | Na2SO4           | 1.00        | water (brine)  | 5.00                      | 1.00                          | 5.00          |
|                                                                |               |               |         |          |             |         |             |                  |                           |                               | 0.00         |                  |             |                |                           |                               | 0.00          |
|                                                                |               |               |         |          |             |         |             |                  |                           |                               | 0.00         |                  |             |                |                           |                               | 0.00          |
|                                                                |               |               |         |          |             |         |             |                  |                           |                               | 0.00         |                  |             |                |                           |                               | 0.00          |
|                                                                |               |               |         |          |             |         |             |                  |                           |                               | 0.00         |                  |             |                |                           |                               | 0.00          |
| <b>Total</b>                                                   | <b>0.2473</b> | <b>256.36</b> |         |          | <b>0.00</b> |         | <b>0.80</b> |                  |                           |                               | <b>10.00</b> |                  | <b>3.00</b> |                |                           |                               | <b>124.70</b> |

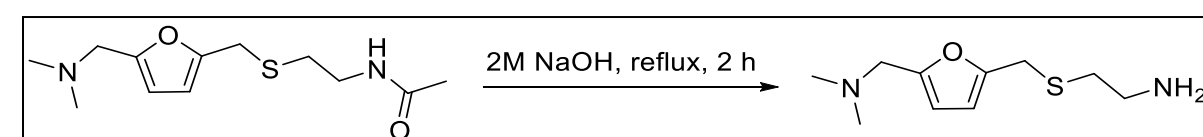

|                                   | Step  | Cumulative |
|-----------------------------------|-------|------------|
| Yield                             | 93.5  | 77.1       |
| Conversion                        | 100.0 | /          |
| Selectivity                       | 93.5  | /          |
| AE                                | 83.6  | 61.8       |
| RME                               | 78.2  | 16.81      |
| PMI total                         | 717.4 | 1866.68    |
| PMI Reaction                      | 57.1  | 203.21     |
| PMI reactants, reagents, catalyst | 5.4   | 10.27      |
| PMI reaction solvents             | 51.7  | 192.938    |
| PMI Workup                        | 660.3 | 1663.471   |
| PMI Workup chemical               | 15.5  | 117.974    |
| PMI workup solvents               | 644.8 | 1545.496   |

|                                    | Mass          | MW            | Mol            |
|------------------------------------|---------------|---------------|----------------|
| <b>Product</b>                     | <b>0.1934</b> | <b>214.32</b> | <b>0.00090</b> |
|                                    | mass          |               |                |
| <b>Unreacted limiting reactant</b> | <b>0.00</b>   |               |                |

### Experimental:

Mark Mascall, Saikat Dutta, Green Chem., 2011, 13, 3101

A solution of 15 (0.2473 g, 0.965 mmol) in freshly prepared 2N aq NaOH (10 mL) was heated at reflux for 2 h. The mixture was cooled to RT and extracted with CH<sub>2</sub>Cl<sub>2</sub> (3×30 mL). The organic layers were combined and washed with saturated brine, dried over Na<sub>2</sub>SO<sub>4</sub>, and evaporated to give 5 (0.1934 g, 94 %) as a pale yellow oil.

### Solvents (First Pass)

|                                                                                                   |                                                                                                                                                                                         | List solvents below |
|---------------------------------------------------------------------------------------------------|-----------------------------------------------------------------------------------------------------------------------------------------------------------------------------------------|---------------------|
| <b>Preferred solvents</b>                                                                         | water, EtOH, nBuOH, AcOipr, AcOnBu, PhOMe, MeOH, tBuOH, BnOH, ethylene glycol, acetone, MEK, MIBK, AcOEt, sulfolane                                                                     | water               |
| <b>Problematic solvents:</b> (acceptable only if substitution does not offer advantages)          | DMSO, cyclohexanone, DMPU, AcOH, Ac <sub>2</sub> O, Acetonitrile, AcOMe, THF, heptane, Me-cyclohexane, toluene, xylene, MTBE, cyclohexane, chlorobenzene, formic acid, pyridine, Me-THF |                     |
| <b>Hazardous solvents:</b> These solvents have significant health and/or safety concerns.         | dioxane, pentane, TEA, diisopropyl ether, DME, DCM, DMF, DMA, NMP, methoxyethanol, hexane                                                                                               | DCM                 |
| <b>Highly hazardous solvents:</b> The solvents which are agreed not to be used, even in screening | Et <sub>2</sub> O, Benzene, CCl <sub>4</sub> , chloroform, DCE, nitromethane, CS <sub>2</sub> , HMPA                                                                                    |                     |

| Catalyst/enzyme (First Pass)                                                    |            | Tick |
|---------------------------------------------------------------------------------|------------|------|
| Catalyst or enzyme used, or reaction takes place without any catalyst/reagents. | Green Flag |      |
| Use of stoichiometric quantities of reagents                                    | Amber Flag | x    |
| Use of reagents in excess                                                       | Red Flag   |      |

|                                    |            |  |
|------------------------------------|------------|--|
| Facile recovery of catalyst/enzyme | Green Flag |  |
| catalyst/enzyme not recovered      | Amber Flag |  |

#### Critical elements

| Supply remaining | Flag colour | Note element |
|------------------|-------------|--------------|
| 5-50 years       | Red Flag    |              |
| 50-500 years     | Amber Flag  | S            |
| +500 years       | Green Flag  |              |

| Energy (First Pass)                          |            | Tick |
|----------------------------------------------|------------|------|
| Reaction run between 0 to 70°C               | Green Flag |      |
| Reaction run between -20 to 0 or 70 to 140°C | Amber Flag | x    |
| Reaction run below -20 or above 140°C        | Red Flag   |      |

|                                                          |            | Tick |
|----------------------------------------------------------|------------|------|
| Reaction run at reflux                                   | Red Flag   | x    |
| Reaction run 5°C or more below the solvent boiling point | Green Flag |      |

| Batch/flow |            | Tick |
|------------|------------|------|
| Flow       | Green Flag |      |
| Batch      | Amber Flag | X    |

| Work Up                                                                                                                                  |            | List |
|------------------------------------------------------------------------------------------------------------------------------------------|------------|------|
| quenching<br>filtration<br>centrifugation<br>crystallisation                                                                             | Green Flag |      |
| Low temperature distillation/evaporation/<br>sublimation (< 140 °C at atmospheric<br>solvent exchange, quenching into aqueous<br>solvent | Amber Flag | x    |
| chromatography/ion exchange<br>high temperature<br>multiple recrystallisation                                                            | Red Flag   |      |

| Health & safety            | Red Flag                     | Amber Flag                   | Green Flag                                                 | List substances and H-codes | List substances and H-codes | List substances and H-codes |
|----------------------------|------------------------------|------------------------------|------------------------------------------------------------|-----------------------------|-----------------------------|-----------------------------|
| Highly explosive           | H200, H201, H202, H203       | H205, H220, H224             | If no red or amber flagged H codes present then green flag |                             |                             |                             |
| Explosive thermal runaway  | H230, H240, H250             | H241                         |                                                            |                             |                             |                             |
| Toxic                      | H300, H310, H330             | H301, H311, H331,            |                                                            |                             |                             |                             |
| Long Term toxicity         | H340, H350, H360, H370, H372 | H341, H351, H361, H371, H373 |                                                            |                             |                             |                             |
| Environmental implications | H400, H410, H411, H420       | H401, H412                   |                                                            |                             |                             |                             |
|                            |                              |                              |                                                            |                             | DCM: H351                   |                             |

| Use of chemicals of environmental concern                                            | List substances of very high concern |
|--------------------------------------------------------------------------------------|--------------------------------------|
| Chemical identified as Substances of Very High Concern by ChemSec which are utilised | Red Flag                             |

## Alternative approach: Step D

Yield, AE, RME, MI/PMI and OE

| Reactant (Limiting Reactant First)                              | Mass (g)      | MW            | Mol     | Catalyst | Mass (g)    | Reagent | Mass (g)    | Reaction solvent | Volume (cm <sup>3</sup> ) | Density (g ml <sup>-1</sup> ) | Mass (g)     | Work up chemical                | Mass (g)     | Workup solvent    | Volume (cm <sup>3</sup> ) | Density (g ml <sup>-1</sup> ) | Mass (g)      |
|-----------------------------------------------------------------|---------------|---------------|---------|----------|-------------|---------|-------------|------------------|---------------------------|-------------------------------|--------------|---------------------------------|--------------|-------------------|---------------------------|-------------------------------|---------------|
| 5-[[[(2-aminoethyl)thio]methyl]-N,N-dimethyl-2-furanmethanamine | 0.1501        | 214.32        | 0.00070 |          |             |         |             | water            | 15.00                     | 1.00                          | 15.00        | NaCl (brine)                    | 11.00        | CHCl <sub>3</sub> | 60.00                     | 1.49                          | 89.40         |
| N-Methyl-1-methylthio-2-nitroethanamine                         | 0.1041        | 148.18        | 0.00070 |          |             |         |             |                  |                           |                               | 0.00         | Na <sub>2</sub> SO <sub>4</sub> | 0.70         | water (brine)     | 30.00                     | 1.00                          | 30.00         |
|                                                                 |               |               |         |          |             |         |             |                  |                           |                               | 0.00         |                                 |              |                   |                           |                               | 0.00          |
|                                                                 |               |               |         |          |             |         |             |                  |                           |                               | 0.00         |                                 |              |                   |                           |                               | 0.00          |
|                                                                 |               |               |         |          |             |         |             |                  |                           |                               | 0.00         |                                 |              |                   |                           |                               | 0.00          |
|                                                                 |               |               |         |          |             |         |             |                  |                           |                               | 0.00         |                                 |              |                   |                           |                               | 0.00          |
| <b>Total</b>                                                    | <b>0.2542</b> | <b>362.50</b> |         |          | <b>0.00</b> |         | <b>0.00</b> |                  |                           |                               | <b>15.00</b> |                                 | <b>11.70</b> |                   |                           |                               | <b>119.40</b> |

|                                   | Step  | Cumulative |
|-----------------------------------|-------|------------|
| Yield                             | 87.9  | 67.7       |
| Conversion                        | 100.0 | /          |
| Selectivity                       | 87.9  | /          |
| AE                                | 86.7  | 63.5       |
| RME                               | 76.1  | 19.41      |
| PMI total                         | 756.4 | 2203.58    |
| PMI Reaction                      | 78.8  | 235.69     |
| PMI reactants, reagents, catalyst | 1.3   | 8.50       |
| PMI reaction solvents             | 77.5  | 227.184    |
| PMI Workup                        | 677.5 | 1967.891   |
| PMI Workup chemical               | 60.5  | 151.979    |
| PMI workup solvents               | 617.1 | 1815.912   |

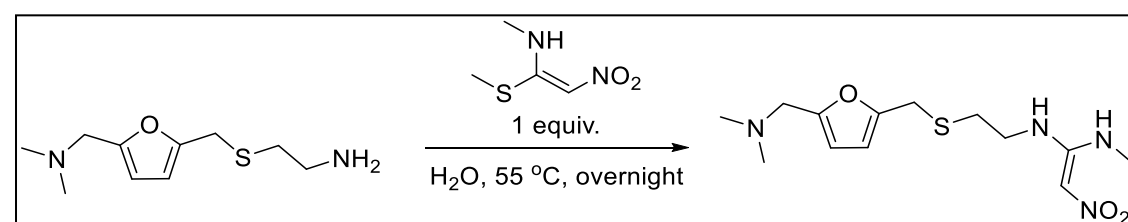

|                                    | Mass   | MW     | Mol     |
|------------------------------------|--------|--------|---------|
| <b>Product</b>                     | 0.1935 | 314.40 | 0.00062 |
|                                    | mass   |        |         |
| <b>Unreacted limiting reactant</b> | 0.00   |        |         |

### Experimental:

Mark Mascal, Saikat Dutta, Green Chem., 2011, 13, 3101

A solution of 5 (0.1501 g, 0.700 mmol) in distilled water (10 mL) was added dropwise over a period of 10 min to a suspension of 1-methylthio-1-methylamino-2-nitroethylene 7 (0.1041 g, 0.703 mmol) in distilled water (5 mL) with stirring. The resulting light yellow solution was placed in an oil bath at 55 °C and the mixture was stirred at that temperature overnight. Saturated brine (30 mL) was added and the mixture was extracted with CHCl<sub>3</sub> (3×20 mL). The combined organic layer was dried over Na<sub>2</sub>SO<sub>4</sub>. Evaporation of the solvent gave 1 as a pale yellow oil (0.1935 g, 88 %)

### Solvents (First Pass)

| Preferred solvents                                                                                | water, EtOH, nBuOH, AcOipr, AcOnBu, PhOMe, MeOH, tBuOH, BnOH, ethylene glycol, acetone, MEK, MIBK, AcOEt, sulfolane                                                                     | List solvents below |
|---------------------------------------------------------------------------------------------------|-----------------------------------------------------------------------------------------------------------------------------------------------------------------------------------------|---------------------|
| <b>Problematic solvents:</b> (acceptable only if substitution does not offer advantages)          | DMSO, cyclohexanone, DMPU, AcOH, Ac <sub>2</sub> O, Acetonitrile, AcOMe, THF, heptane, Me-cyclohexane, toluene, xylene, MTBE, cyclohexane, chlorobenzene, formic acid, pyridine, Me-THF | water               |
| <b>Hazardous solvents:</b> These solvents have significant health and/or safety concerns.         | dioxane, pentane, TEA, diisopropyl ether, DME, DCM, DMF, DMA, NMP, methoxyethanol, hexane                                                                                               |                     |
| <b>Highly hazardous solvents:</b> The solvents which are agreed not to be used, even in screening | Et <sub>2</sub> O, Benzene, CCl <sub>4</sub> , chloroform, DCE, nitromethane, CS <sub>2</sub> , HMPA                                                                                    | CHCl <sub>3</sub>   |

| Catalyst/enzyme (First Pass)                                                    |            | Tick |
|---------------------------------------------------------------------------------|------------|------|
| Catalyst or enzyme used, or reaction takes place without any catalyst/reagents. | Green Flag |      |
| Use of stoichiometric quantities of reagents                                    | Amber Flag | x    |
| Use of reagents in excess                                                       | Red Flag   |      |

|                                    |            | Tick |
|------------------------------------|------------|------|
| Facile recovery of catalyst/enzyme | Green Flag |      |
| catalyst/enzyme not recovered      | Amber Flag |      |

#### Critical elements

| Supply remaining | Flag colour | Note element |
|------------------|-------------|--------------|
| 5-50 years       | Red Flag    |              |
| 50-500 years     | Amber Flag  | S            |
| +500 years       | Green Flag  |              |

| Energy (First Pass)                          |            | Tick |
|----------------------------------------------|------------|------|
| Reaction run between 0 to 70°C               | Green Flag | x    |
| Reaction run between -20 to 0 or 70 to 140°C | Amber Flag |      |
| Reaction run below -20 or above 140°C        | Red Flag   |      |

|                                                          |            | Tick |
|----------------------------------------------------------|------------|------|
| Reaction run at reflux                                   | Red Flag   |      |
| Reaction run 5°C or more below the solvent boiling point | Green Flag | x    |

| Batch/flow |            | Tick |
|------------|------------|------|
| Flow       | Green Flag |      |
| Batch      | Amber Flag | X    |

| Work Up                                                                            |            | List |
|------------------------------------------------------------------------------------|------------|------|
| quenching<br>filtration<br>centrifugation<br>crystallisation                       | Green Flag |      |
| Low temperature distillation/evaporation/<br>sublimation (< 140 °C at atmospheric) |            |      |
| solvent exchange, quenching into aqueous solvent                                   | Amber Flag | x    |
| chromatography/ion exchange<br>high temperature<br>multiple recrystallisation      | Red Flag   |      |

| Health & safety            |                              |                              | List substances and H-codes                                | List substances and H-codes | List substances and H-codes   |
|----------------------------|------------------------------|------------------------------|------------------------------------------------------------|-----------------------------|-------------------------------|
|                            | Red Flag                     | Amber Flag                   | Green Flag                                                 |                             |                               |
| Highly explosive           | H200, H201, H202, H203       | H205, H220, H224             | If no red or amber flagged H codes present then green flag |                             |                               |
| Explosive thermal runaway  | H230, H240, H250             | H241                         |                                                            | CHCl3: H372                 | CHCl3: H331, H351, H361, H412 |
| Toxic                      | H300, H310, H330             | H301, H311, H331,            |                                                            |                             |                               |
| Long Term toxicity         | H340, H350, H360, H370, H372 | H341, H351, H361, H371, H373 |                                                            |                             |                               |
| Environmental implications | H400, H410, H411, H420       | H401, H412                   |                                                            |                             |                               |

| Use of chemicals of environmental concern                                            | List substances of very high concern |
|--------------------------------------------------------------------------------------|--------------------------------------|
| Chemical identified as Substances of Very High Concern by ChemSec which are utilised | Red Flag                             |

# Classical approach: Step 1

Yield, AE, RME, MI/PMI and OE

| Reactant (Limiting Reactant First) | Mass (g)     | MW           | Mol  | Catalyst                              | Mass (g)     | Reagent | Mass (g)    | Reaction solvent | Volume (cm <sup>3</sup> ) | Density (g ml <sup>-1</sup> ) | Mass (g)     | Work up chemical | Mass (g)    | Workup solvent | Volume (cm <sup>3</sup> ) | Density (g ml <sup>-1</sup> ) | Mass (g)    |
|------------------------------------|--------------|--------------|------|---------------------------------------|--------------|---------|-------------|------------------|---------------------------|-------------------------------|--------------|------------------|-------------|----------------|---------------------------|-------------------------------|-------------|
| 1,3-butadiene                      | 54.00        | 54.09        | 1.00 | Ni[P(OEt) <sub>3</sub> ] <sub>4</sub> | 20.00        |         |             | benzene          | 50.00                     | 0.88                          | 43.80        |                  |             |                |                           |                               | 0.00        |
| HCN                                | 18.50        | 27.02        | 0.68 |                                       |              |         |             |                  |                           |                               | 0.00         |                  |             |                |                           |                               | 0.00        |
|                                    |              |              |      |                                       |              |         |             |                  |                           |                               | 0.00         |                  |             |                |                           |                               | 0.00        |
|                                    |              |              |      |                                       |              |         |             |                  |                           |                               | 0.00         |                  |             |                |                           |                               | 0.00        |
|                                    |              |              |      |                                       |              |         |             |                  |                           |                               | 0.00         |                  |             |                |                           |                               | 0.00        |
|                                    |              |              |      |                                       |              |         |             |                  |                           |                               | 0.00         |                  |             |                |                           |                               | 0.00        |
| <b>Total</b>                       | <b>72.50</b> | <b>81.11</b> |      |                                       | <b>20.00</b> |         | <b>0.00</b> |                  |                           |                               | <b>43.80</b> |                  | <b>0.00</b> |                |                           |                               | <b>0.00</b> |

|                                   | Step  | Cumulative |
|-----------------------------------|-------|------------|
| Yield                             | 39.0  | 39.0       |
| Conversion                        | 100.0 | /          |
| Selectivity                       | 39.0  | /          |
| AE                                | 100.0 | 100.0      |
| RME                               | 43.5  | 43.5       |
| PMI total                         | 4.3   | 4.3        |
| PMI Reaction                      | 4.3   | 4.3        |
| PMI reactants, reagents, catalyst | 2.9   | 2.9        |
| PMI reaction solvents             | 1.4   | 1.4        |
| PMI Workup                        | 0.0   | 0.0        |
| PMI Workup chemical               | 0.0   | 0.0        |
| PMI workup solvents               | 0.0   | 0.0        |

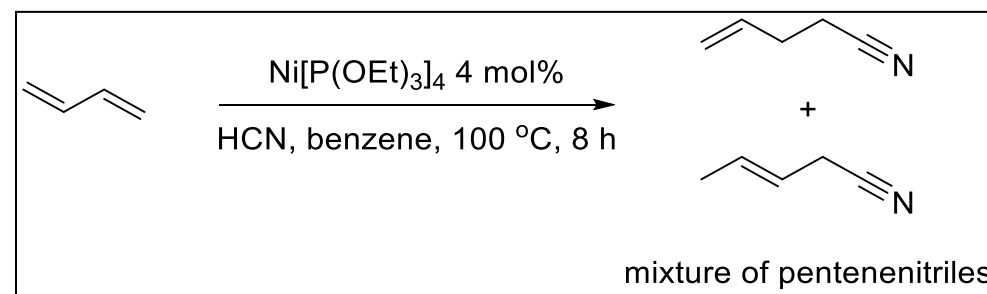

| Product                     | Mass  | MW    | Mol  |
|-----------------------------|-------|-------|------|
|                             | 31.55 | 81.12 | 0.39 |
| Unreacted limiting reactant | mass  |       |      |
|                             | 0.00  |       |      |

## Solvents (First Pass)

| Preferred solvents                                                                                | water, EtOH, nBuOH, AcOipr, AcOnBu, PhOMe, MeOH, tBuOH, BnOH, ethylene glycol, acetone, MEK, MIBK, AcOEt, sulfolane                                                                     | List solvents below |
|---------------------------------------------------------------------------------------------------|-----------------------------------------------------------------------------------------------------------------------------------------------------------------------------------------|---------------------|
| <b>Problematic solvents:</b> (acceptable only if substitution does not offer advantages)          | DMSO, cyclohexanone, DMPU, AcOH, Ac <sub>2</sub> O, Acetonitrile, AcOMe, THF, heptane, Me-cyclohexane, toluene, xylene, MTBE, cyclohexane, chlorobenzene, formic acid, pyridine, Me-THF |                     |
| <b>Hazardous solvents:</b> These solvents have significant health and/or safety concerns.         | dioxane, pentane, TEA, diisopropyl ether, DME, DCM, DMF, DMA, NMP, methoxyethanol, hexane                                                                                               |                     |
| <b>Highly hazardous solvents:</b> The solvents which are agreed not to be used, even in screening | Et <sub>2</sub> O, Benzene, CCl <sub>4</sub> , chloroform, DCE, nitromethane, CS <sub>2</sub> , HMPA                                                                                    | Benzene             |

## Catalyst/enzyme (First Pass)

|                                                                                 |            | Tick |
|---------------------------------------------------------------------------------|------------|------|
| Catalyst or enzyme used, or reaction takes place without any catalyst/reagents. | Green Flag | x    |
| Use of stoichiometric quantities of reagents                                    | Amber Flag |      |
| Use of reagents in excess                                                       | Red Flag   |      |

|                                    |            | Tick |
|------------------------------------|------------|------|
| Facile recovery of catalyst/enzyme | Green Flag | x    |
| catalyst/enzyme not recovered      | Amber Flag |      |

## Experimental:

William, C. D. & Richard, V. L., JR. Hydrocyanation of olefins using selected nickel phosphite catalysts. US3496215 (A) (1965).

A mixture of 20 g. of Ni[P(OEt)<sub>3</sub>]<sub>4</sub>, 50 ml. benzene, 108 g. of liquid butadiene, and 54 ml. of liquid HCN is charged to a cooled, 400 ml., stainless steel pressure tube. The tube is heated at 100° C. for 8 hours, then cooled and vented. The dark red, crude liquid is distilled at 0.1 mm. at a pot temperature up to 100° C. to obtain a mixture of products composed of: 0.65 g. of trans-2-methyl-2-butenitrile, 46.0 g. of 2-methyl-3-butenitrile, 3.1 g. of cis-2-methyl-2-butenitrile, 58.3 g. of trans-3-pentenenitrile, and 0.61 g. of cis-3-pentenenitrile. These products represent 49 cycles (moles of product/moles of catalyst) of the catalyst to produce nitrile products. Products are separated by gas chromatography and identified by gas chromatographic retention time, mass spectrometry, infrared spectrometry, nuclear magnetic resonance spectroscopy.

Table I reports the results obtained for the hydrocyanation of butadiene using a representative group of tetrakis (organophosphite)nickel(O) catalysts using the conditions described in Example I. In each case, a temperature of 100° C. for 8 hours is used. In Table I, Et stands for ethyl, Bu for butyl, iPr for isopropyl, φ for phenyl, and Me for methyl.

| Products                             | Ni[P(OEt) <sub>3</sub> ] <sub>4</sub> |
|--------------------------------------|---------------------------------------|
| Cis-3-pentenenitrile, g.....         | .77                                   |
| 4-pentenenitrile, g.....             | .34                                   |
| Trans-3-pentenenitrile, g.....       | 30.1                                  |
| Cis-2-methyl-2-butenitrile, g.....   | .34                                   |
| 2-methyl-3-butenitrile, g.....       | 22.3                                  |
| Trans-2-methyl-2-butenitrile, g..... | .26                                   |
| Reagents:                            |                                       |
| HCN, ml.....                         | 27                                    |
| Butadiene, g.....                    | 54                                    |
| Catalyst, g.....                     | 20                                    |

## Experimental:

Green Chem., 2015, 17, 4760–4772, DOI: 10.1039/c5gc01549a

The PEP yearbook 2012 gives the following process summary for the HMDA production from butadiene according to the Dupont process. It is worthwhile to note that this model is quite approximate and not fully representative of the new generations of HMDA processes. Butadiene and hydrogen cyanide react at 80 C and 7.8 atm using a Ni-tri-o-tolylphosphite (NTOTP) catalyst to form pentenenitriles (PNs) and unconverted reactants are recycled. PNs are distilled to remove methyl-butenitrile, which is isomerized into PNs over a Ni catalyst and distilled for PNs recovery. PNs from hydrocyanation and isomerization are hydrocyanated to adiponitrile (ADN) at 41-65 C and 1 atm using a NTOTP catalyst and triphenylborane (TPB) promoter. After PN separation, the reaction product is extracted with cyclohexane to separate NTOTP, which is recovered by evaporating the cyclohexane. The raffinate is distilled to recover PNs for recycling, to remove ADN isomers, and to recover ADN. The spent catalyst and TBP are recovered by a series of steps, including ammoniation, evaporation, calcination, and reaction with triethylphosphite. Further hydrogenation of the ADN into HMDA can be carried out in the temperature range 90-200° C under hydrogen pressure of about (range 250-400 atm) in the presence of ammonia in an ammonia-to-ADN weight ratio of at least about 1.8/1. The product yield is about 85% based on butadiene and 88.7% based on HCN.

**Critical elements**

| Supply remaining | Flag colour | Note element |
|------------------|-------------|--------------|
| 5-50 years       | Red Flag    |              |
| 50-500 years     | Amber Flag  | Ni, P        |
| +500 years       | Green Flag  |              |

**Energy (First Pass)**

|                                              |            | Tick |
|----------------------------------------------|------------|------|
| Reaction run between 0 to 70°C               | Green Flag |      |
| Reaction run between -20 to 0 or 70 to 140°C | Amber Flag | x    |
| Reaction run below -20 or above 140°C        | Red Flag   |      |

**Batch/flow**

|       |            | Tick |
|-------|------------|------|
| Flow  | Green Flag |      |
| Batch | Amber Flag | X    |

|                                                          |            | Tick |
|----------------------------------------------------------|------------|------|
| Reaction run at reflux                                   | Red Flag   | x    |
| Reaction run 5°C or more below the solvent boiling point | Green Flag |      |

**Work Up**

|                                                                                    |            | List |
|------------------------------------------------------------------------------------|------------|------|
| quenching<br>filtration<br>centrifugation<br>crystallisation                       | Green Flag | x    |
| Low temperature distillation/evaporation/<br>sublimation (< 140 °C at atmospheric) |            |      |
| solvent exchange, quenching into aqueous<br>solvent                                | Amber Flag |      |
| chromatography/ion exchange<br>high temperature<br>multiple recrystallisation      | Red Flag   |      |

**Health & safety**

|                                   | Red Flag                     | Amber Flag                   | Green Flag                                                 | List substances and H-codes                                                    | List substances and H-codes | List substances and H-codes |
|-----------------------------------|------------------------------|------------------------------|------------------------------------------------------------|--------------------------------------------------------------------------------|-----------------------------|-----------------------------|
| <b>Highly explosive</b>           | H200, H201, H202, H203       | H205, H220, H224             | If no red or amber flagged H codes present then green flag | 1,3-Butadiene H220 - H280 - H340                                               |                             |                             |
| <b>Explosive thermal runaway</b>  | H230, H240, H250             | H241                         |                                                            | HCN H224, H330, H400, H410                                                     |                             |                             |
| <b>Toxic</b>                      | H300, H310, H330             | H301, H311, H331,            |                                                            | Benzene H302, H315, H319, H361, H370, H372, H340, H350, H336, H304, H411, H225 |                             |                             |
| <b>Long Term toxicity</b>         | H340, H350, H360, H370, H372 | H341, H351, H361, H371, H373 |                                                            |                                                                                |                             |                             |
| <b>Environmental implications</b> | H400, H410, H411, H420       | H401, H412                   |                                                            |                                                                                |                             |                             |

**Use of chemicals of environmental concern**

|                                                                                      |          | List substances of very high concern |
|--------------------------------------------------------------------------------------|----------|--------------------------------------|
| Chemical identified as Substances of Very High Concern by ChemSec which are utilised | Red Flag |                                      |



## Classical approach: Step 2

Yield, AE, RME, MI/PMI and OE

| Reactant (Limiting Reactant First) | Mass (g)     | MW            | Mol  | Catalyst                                                          | Mass (g)    | Reagent | Mass (g)    | Reaction solvent | Volume (cm <sup>3</sup> ) | Density (g ml <sup>-1</sup> ) | Mass (g)    | Work up chemical | Mass (g)    | Workup solvent | Volume (cm <sup>3</sup> ) | Density (g ml <sup>-1</sup> ) | Mass (g) |             |
|------------------------------------|--------------|---------------|------|-------------------------------------------------------------------|-------------|---------|-------------|------------------|---------------------------|-------------------------------|-------------|------------------|-------------|----------------|---------------------------|-------------------------------|----------|-------------|
| 3-pentenenitrile                   | 20.00        | 81.12         | 0.25 | Ni[P(OC <sub>6</sub> H <sub>5</sub> ) <sub>3</sub> ] <sub>4</sub> | 0.65        |         |             | N <sub>2</sub>   | 3620.00                   | 1.25E-03                      | 4.53        |                  |             |                |                           |                               |          | 0.00        |
| HCN                                | 6.87         | 27.02         | 0.25 | Zn(CH <sub>3</sub> COO) <sub>2</sub> ·2H <sub>2</sub> O           | 2.19        |         |             |                  |                           |                               | 0.00        |                  |             |                |                           |                               |          | 0.00        |
|                                    |              |               |      | P(OC <sub>6</sub> H <sub>5</sub> ) <sub>3</sub>                   | 3.10        |         |             |                  |                           |                               | 0.00        |                  |             |                |                           |                               |          | 0.00        |
|                                    |              |               |      |                                                                   |             |         |             |                  |                           |                               | 0.00        |                  |             |                |                           |                               |          | 0.00        |
| <b>Total</b>                       | <b>26.87</b> | <b>108.14</b> |      |                                                                   | <b>5.94</b> |         | <b>0.00</b> |                  |                           |                               | <b>4.53</b> |                  | <b>0.00</b> |                |                           |                               |          | <b>0.00</b> |

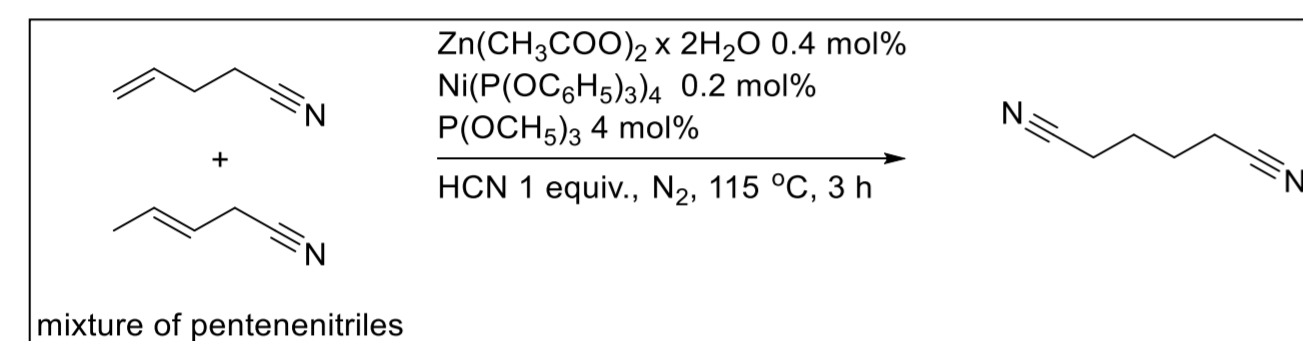

|                                   | Step  | Cumulative |
|-----------------------------------|-------|------------|
| Yield                             | 60.8  | 23.7       |
| Conversion                        | 75.7  | /          |
| Selectivity                       | 80.3  | /          |
| AE                                | 100.0 | 100.0      |
| RME                               | 60.3  | 30.67      |
| PMI total                         | 2.3   | 6.40       |
| PMI Reaction                      | 2.3   | 6.40       |
| PMI reactants, reagents, catalyst | 2.0   | 4.41       |
| PMI reaction solvents             | 0.3   | 1.993      |
| PMI Workup                        | 0.0   | 0.000      |
| PMI Workup chemical               | 0.0   | 0.000      |
| PMI workup solvents               | 0.0   | 0.000      |

|                             | Mass  | MW     | Mol  |
|-----------------------------|-------|--------|------|
| Product                     | 16.20 | 108.14 | 0.15 |
| Unreacted limiting reactant | 4.87  |        |      |

### Solvents (First Pass)

| Preferred solvents                                                                                | water, EtOH, nBuOH, AcOipr, AcOnBu, PhOMe, MeOH, tBuOH, BnOH, ethylene glycol, acetone, MEK, MIBK, AcOEt, sulfolane                                                                     | List solvents below |
|---------------------------------------------------------------------------------------------------|-----------------------------------------------------------------------------------------------------------------------------------------------------------------------------------------|---------------------|
| <b>Problematic solvents:</b> (acceptable only if substitution does not offer advantages)          | DMSO, cyclohexanone, DMPU, AcOH, Ac <sub>2</sub> O, Acetonitrile, AcOMe, THF, heptane, Me-cyclohexane, toluene, xylene, MTBE, cyclohexane, chlorobenzene, formic acid, pyridine, Me-THF |                     |
| <b>Hazardous solvents:</b> These solvents have significant health and/or safety concerns.         | dioxane, pentane, TEA, diisopropyl ether, DME, DCM, DMF, DMA, NMP, methoxyethanol, hexane                                                                                               |                     |
| <b>Highly hazardous solvents:</b> The solvents which are agreed not to be used, even in screening | Et <sub>2</sub> O, Benzene, CCl <sub>4</sub> , chloroform, DCE, nitromethane, CS <sub>2</sub> , HMPA                                                                                    |                     |

### Catalyst/enzyme (First Pass)

|                                                                                 | Green Flag | Amber Flag | Red Flag | Tick |
|---------------------------------------------------------------------------------|------------|------------|----------|------|
| Catalyst or enzyme used, or reaction takes place without any catalyst/reagents. |            |            |          | x    |
| Use of stoichiometric quantities of reagents                                    |            |            |          |      |
| Use of reagents in excess                                                       |            |            |          |      |

|                                    | Green Flag | Amber Flag | Tick |
|------------------------------------|------------|------------|------|
| Facile recovery of catalyst/enzyme |            |            | X    |
| catalyst/enzyme not recovered      |            |            |      |

### Experimental:

Yuan-tsan Chia, William Charles Drinkard, Edward Noonan Squire, Hydrocyanation of olefins, US3766237A, 1973

A 50 ml, three-necked, round bottom flask fitted with a reflux condenser connected to a Dry Ice trap, an inlet, and a magnetic stirrer, is set up in an oil bath maintained at 115° C. and purged with dry, deoxygenated nitrogen. The flask is charged with 2.19 g. (0.001 mole) of Zn(CH<sub>3</sub>COO)<sub>2</sub>·2H<sub>2</sub>O followed by 0.650 g. (0.0005 mole) of Ni(P(OCH<sub>5</sub>)<sub>3</sub>)<sub>4</sub>, 20 g. (0.25 mole) of 3-pentenenitrile, and 3.1 g (0.01mole) of P(OCH<sub>5</sub>)<sub>3</sub>. A stream of dry, deoxygenated nitrogen gas is bubbled through 10 ml. of liquid hydrogen cyanide contained in a 20 ml. receiver cooled in an ice bath. The nitrogen gas flow is adjusted to 20 ml. of nitrogen per minute to give a gaseous hydrogen cyanide feed rate equivalent to about 1.0 ml. measured at 0° C. of liquid hydrogen cyanide per hour. The resulting mixture of gases is passed through a bed of phosphorus pentoxide to eliminate traces of moisture and then is swept across the surface of the reaction mixture in the flask. After three hours, the reaction is shut down.

Gas chromatographic analysis indicates a yield of 16.2 g. of adiponitrile (79 percent as based on 3-pentenenitrile converted) and 4.4g. of 2-methylglutaronitrile. The number of cycles is 92.

### Experimental:

Green Chem., 2015, 17, 4760–4772, DOI: 10.1039/c5gc01549a

The PEP yearbook 2012 gives the following process summary for the HMDA production from butadiene according to the Dupont process. It is worthwhile to note that this model is quite approximate and not fully representative of the new generations of HMDA processes. Butadiene and hydrogen cyanide react at 80 C and 7.8 atm using a Ni-tri-o-tolylphosphite (NTOTP) catalyst to form pentenenitriles (PNs) and unconverted reactants are recycled. PNs are distilled to remove methyl-butenenitrile, which is isomerized into PNs over a Ni catalyst and distilled for PNs recovery. PNs from hydrocyanation and isomerization are hydrocyanated to adiponitrile (ADN) at 41-65 C and 1 atm using a NTOTP catalyst and triphenylborane (TPB) promoter. After PN separation, the reaction product is extracted with cyclohexane to separate NTOTP, which is recovered by evaporating the cyclohexane. The raffinate is distilled to recover PNs for recycling, to remove ADN isomers, and to recover ADN. The spent catalyst and TBP are recovered by a series of steps, including ammoniation, evaporation, calcination, and reaction with triethylphosphite. Further hydrogenation of the ADN into HMDA can be carried out in the temperature range 90-200° C under hydrogen pressure of about (range 250-400 atm) in the presence of ammonia in an ammonia-to-ADN weight ratio of at least about 1.8/1. The product yield is about 85% based on butadiene and 88.7% based on HCN.

**Critical elements**

| Supply remaining | Flag colour | Note element |
|------------------|-------------|--------------|
| 5-50 years       | Red Flag    | Zn           |
| 50-500 years     | Amber Flag  | Ni, P        |
| +500 years       | Green Flag  |              |

| Energy (First Pass)                          |            | Tick |
|----------------------------------------------|------------|------|
| Reaction run between 0 to 70°C               | Green Flag |      |
| Reaction run between -20 to 0 or 70 to 140°C | Amber Flag | x    |
| Reaction run below -20 or above 140°C        | Red Flag   |      |

| Batch/flow |            | Tick |
|------------|------------|------|
| Flow       | Green Flag |      |
| Batch      | Amber Flag | X    |

|                                                          |            | Tick |
|----------------------------------------------------------|------------|------|
| Reaction run at reflux                                   | Red Flag   | x    |
| Reaction run 5°C or more below the solvent boiling point | Green Flag |      |

| Work Up                                                                                                                                                                                                  |            | List |
|----------------------------------------------------------------------------------------------------------------------------------------------------------------------------------------------------------|------------|------|
| quenching<br>filtration<br>centrifugation<br>crystallisation<br>Low temperature distillation/evaporation/<br>sublimation (< 140 °C at atmospheric<br>solvent exchange, quenching into aqueous<br>solvent | Green Flag | x    |
| chromatography/ion exchange<br>high temperature<br>multiple recrystallisation                                                                                                                            | Red Flag   |      |

**Health & safety**

|                                   | Red Flag                     | Amber Flag                   | Green Flag                                                 | List substances and H-codes      | List substances and H-codes       | List substances and H-codes |
|-----------------------------------|------------------------------|------------------------------|------------------------------------------------------------|----------------------------------|-----------------------------------|-----------------------------|
| <b>Highly explosive</b>           | H200, H201, H202, H203       | H205, H220, H224             | If no red or amber flagged H codes present then green flag | 1,3-Butadiene H220 - H280 - H340 | 3-Pentenenitrile H226, H302, H331 |                             |
| <b>Explosive thermal runaway</b>  | H230, H240, H250             | H241                         |                                                            | HCN H224, H330, H400, H410       |                                   |                             |
| <b>Toxic</b>                      | H300, H310, H330             | H301, H311, H331,            |                                                            | Zn(OAc)2 H302, H318, H411        |                                   |                             |
| <b>Long Term toxicity</b>         | H340, H350, H360, H370, H372 | H341, H351, H361, H371, H373 |                                                            |                                  |                                   |                             |
| <b>Environmental implications</b> | H400, H410, H411, H420       | H401, H412                   |                                                            |                                  |                                   |                             |

| Use of chemicals of environmental concern                                            |          | List substances of very high concern |
|--------------------------------------------------------------------------------------|----------|--------------------------------------|
| Chemical identified as Substances of Very High Concern by ChemSec which are utilised | Red Flag |                                      |

## Classical approach: Step 3

Yield, AE, RME, MI/PMI and OE

| Reactant (Limiting Reactant First) | Mass (g)      | MW            | Mol   | Catalyst    | Mass (g)     | Reagent | Mass (g)    | Reaction solvent | Volume (cm <sup>3</sup> ) | Density (g ml <sup>-1</sup> ) | Mass (g)    | Work up chemical | Mass (g)    | Workup solvent | Volume (cm <sup>3</sup> ) | Density (g ml <sup>-1</sup> ) | Mass (g)    |
|------------------------------------|---------------|---------------|-------|-------------|--------------|---------|-------------|------------------|---------------------------|-------------------------------|-------------|------------------|-------------|----------------|---------------------------|-------------------------------|-------------|
| adiponitrile                       | 216.00        | 108.14        | 2.00  | Fe catalyst | 20.00        |         |             |                  |                           |                               | 0.00        |                  |             |                |                           |                               | 0.00        |
| ammonia gas                        | 216.00        | 17.03         | 12.68 |             |              |         |             |                  |                           |                               | 0.00        |                  |             |                |                           |                               | 0.00        |
| hydrogen gas                       | 19.66         | 2.02          | 9.73  |             |              |         |             |                  |                           |                               | 0.00        |                  |             |                |                           |                               | 0.00        |
|                                    |               |               |       |             |              |         |             |                  |                           |                               | 0.00        |                  |             |                |                           |                               | 0.00        |
|                                    |               |               |       |             |              |         |             |                  |                           |                               | 0.00        |                  |             |                |                           |                               | 0.00        |
|                                    |               |               |       |             |              |         |             |                  |                           |                               | 0.00        |                  |             |                |                           |                               | 0.00        |
| <b>Total</b>                       | <b>451.66</b> | <b>127.19</b> |       |             | <b>20.00</b> |         | <b>0.00</b> |                  |                           |                               | <b>0.00</b> |                  | <b>0.00</b> |                |                           |                               | <b>0.00</b> |

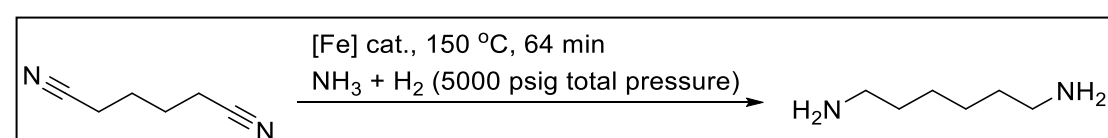

|                                   | Step  | Cumulative |
|-----------------------------------|-------|------------|
| Yield                             | 97.8  | 23.1       |
| Conversion                        | 100.0 | /          |
| Selectivity                       | 97.8  | /          |
| AE                                | 91.4  | 91.4       |
| RME                               | 50.3  | 24.15      |
| PMI total                         | 2.1   | 7.22       |
| PMI Reaction                      | 2.1   | 7.22       |
| PMI reactants, reagents, catalyst | 2.1   | 5.32       |
| PMI reaction solvents             | 0.0   | 1.897      |
| PMI Workup                        | 0.0   | 0.000      |
| PMI Workup chemical               | 0.0   | 0.000      |
| PMI workup solvents               | 0.0   | 0.000      |

| Product                     | Mass   | MW     | Mol  |
|-----------------------------|--------|--------|------|
|                             | 227.00 | 116.21 | 1.95 |
| Unreacted limiting reactant | mass   |        |      |

### Experimental:

Donald Bernard Bivens; Leo Wesley Patton; William Erbie Thomas, Hydrogenation of adiponitrile, US3758584A, 1970

A batch hydrogenation is conducted using 216 g. adiponitrile, 216 g ammonia, and 20 g of catalyst in a one liter stirred autoclave, at 150° C. and 5000 psig total pressure (pH<sub>2</sub> = 3500 psig; pNH<sub>3</sub> + ADN = 1500 psig). The reaction is apparently complete in 64 minutes, having consumed the theoretical quantity of hydrogen based on ADN.

### Solvents (First Pass)

| Preferred solvents                                                                                | water, EtOH, nBuOH, AcOipr, AcOnBu, PhOMe, MeOH, tBuOH, BnOH, ethylene glycol, acetone, MEK, MIBK, AcOEt, sulfolane                                                        | List solvents below |
|---------------------------------------------------------------------------------------------------|----------------------------------------------------------------------------------------------------------------------------------------------------------------------------|---------------------|
| <b>Problematic solvents:</b> (acceptable only if substitution does not offer advantages)          | DMSO, cyclohexanone, DMPU, AcOH, Ac2O, Acetonitrile, AcOMe, THF, heptane, Me-cyclohexane, toluene, xylene, MTBE, cyclohexane, chlorobenzene, formic acid, pyridine, Me-THF |                     |
| <b>Hazardous solvents:</b> These solvents have significant health and/or safety concerns.         | dioxane, pentane, TEA, diisopropyl ether, DME, DCM, DMF, DMA, NMP, methoxyethanol, hexane                                                                                  |                     |
| <b>Highly hazardous solvents:</b> The solvents which are agreed not to be used, even in screening | Et <sub>2</sub> O, Benzene, CCl <sub>4</sub> , chloroform, DCE, nitromethane, CS <sub>2</sub> , HMPA                                                                       |                     |

### Catalyst/enzyme (First Pass)

|                                                                                 |            | Tick |
|---------------------------------------------------------------------------------|------------|------|
| Catalyst or enzyme used, or reaction takes place without any catalyst/reagents. | Green Flag | x    |
| Use of stoichiometric quantities of reagents                                    | Amber Flag |      |
| Use of reagents in excess                                                       | Red Flag   |      |

|                                    |            | Tick |
|------------------------------------|------------|------|
| Facile recovery of catalyst/enzyme | Green Flag | X    |
| catalyst/enzyme not recovered      | Amber Flag |      |

### Experimental:

Green Chem., 2015, 17, 4760–4772, DOI: 10.1039/c5gc01549a

The PEP yearbook 2012 gives the following process summary for the HMDA production from butadiene according to the Dupont process. It is worthwhile to note that this model is quite approximate and not fully representative of the new generations of HMDA processes. Butadiene and hydrogen cyanide react at 80 C and 7.8 atm using a Ni-tri-o-tolylphosphite (NTOTP) catalyst to form pentenenitriles (PNs) and unconverted reactants are recycled. PNs are distilled to remove methyl-butenenitrile, which is isomerized into PNs over a Ni catalyst and distilled for PNs recovery. PNs from hydrocyanation and isomerization are hydrocyanated to adiponitrile (ADN) at 41-65 C and 1 atm using a NTOTP catalyst and triphenylborane (TPB) promoter. After PN separation, the reaction product is extracted with cyclohexane to separate NTOTP, which is recovered by evaporating the cyclohexane. The raffinate is distilled to recover PNs for recycling, to remove ADN isomers, and to recover ADN. The spent catalyst and TBP are recovered by a series of steps, including ammoniation, evaporation, calcination, and reaction with triitolylphosphite. Further hydrogenation of the ADN into HMDA can be carried out in the temperature range 90-200° C under hydrogen pressure of about (range 250-400 atm) in the presence of ammonia in an ammonia-to-ADN weight ratio of at least about 1.8/1. The product yield is about 85% based on butadiene and 88.7% based on HCN.

**Critical elements**

| Supply remaining | Flag colour | Note element |
|------------------|-------------|--------------|
| 5-50 years       | Red Flag    |              |
| 50-500 years     | Amber Flag  |              |
| +500 years       | Green Flag  | X            |

**Energy (First Pass)**

|                                              |            | Tick |
|----------------------------------------------|------------|------|
| Reaction run between 0 to 70°C               | Green Flag |      |
| Reaction run between -20 to 0 or 70 to 140°C | Amber Flag |      |
| Reaction run below -20 or above 140°C        | Red Flag   | x    |

**Batch/flow**

|       |            | Tick |
|-------|------------|------|
| Flow  | Green Flag |      |
| Batch | Amber Flag | X    |

|                                                          |            | Tick |
|----------------------------------------------------------|------------|------|
| Reaction run at reflux                                   | Red Flag   | x    |
| Reaction run 5°C or more below the solvent boiling point | Green Flag |      |

**Work Up**

|                                                                                                                                          |            | List |
|------------------------------------------------------------------------------------------------------------------------------------------|------------|------|
| quenching<br>filtration<br>centrifugation<br>crystallisation                                                                             | Green Flag | x    |
| Low temperature distillation/evaporation/<br>sublimation (< 140 °C at atmospheric<br>solvent exchange, quenching into aqueous<br>solvent | Amber Flag |      |
| chromatography/ion exchange<br>high temperature<br>multiple recrystallisation                                                            | Red Flag   |      |

**Health & safety**

|                                   | Red Flag                     | Amber Flag                   | Green Flag                                                 | List substances and H-codes    | List substances and H-codes | List substances and H-codes |  |
|-----------------------------------|------------------------------|------------------------------|------------------------------------------------------------|--------------------------------|-----------------------------|-----------------------------|--|
| <b>Highly explosive</b>           | H200, H201, H202, H203       | H205, H220, H224             | If no red or amber flagged H codes present then green flag | NH3 gas H280, H314, H331, H410 | Adiponitrile H301, H332     |                             |  |
| <b>Explosive thermal runaway</b>  | H230, H240, H250             | H241                         |                                                            |                                |                             | Hydrogen gas H220 - H280    |  |
| <b>Toxic</b>                      | H300, H310, H330             | H301, H311, H331,            |                                                            |                                |                             |                             |  |
| <b>Long Term toxicity</b>         | H340, H350, H360, H370, H372 | H341, H351, H361, H371, H373 |                                                            |                                |                             |                             |  |
| <b>Environmental implications</b> | H400, H410, H411, H420       | H401, H412                   |                                                            |                                |                             |                             |  |

**Use of chemicals of environmental concern**

|                                                                                      |          | List substances of very high concern |
|--------------------------------------------------------------------------------------|----------|--------------------------------------|
| Chemical identified as Substances of Very High Concern by ChemSec which are utilised | Red Flag |                                      |

## Bio-based approach: Step I

Yield, AE, RME, MI/PMI and OE

| Reactant (Limiting Reactant First) | Mass (g)    | MW            | Mol     | Catalyst              | Mass (g)    | Reagent | Mass (g)    | Reaction solvent | Volume (cm <sup>3</sup> ) | Density (g ml <sup>-1</sup> ) | Mass (g)     | Work up chemical | Mass (g)    | Workup solvent | Volume (cm3) | Density (g ml <sup>-1</sup> ) | Mass (g) |             |
|------------------------------------|-------------|---------------|---------|-----------------------|-------------|---------|-------------|------------------|---------------------------|-------------------------------|--------------|------------------|-------------|----------------|--------------|-------------------------------|----------|-------------|
| 5-HMF                              | 0.500       | 126.11        | 0.0040  | Raney nickel catalyst | 0.050       |         |             | ethanol          | 30.00                     | 0.79                          | 23.70        |                  |             |                |              |                               |          | 0.00        |
| hydrogen gas                       | 0.75        | 2.02          | 0.37129 |                       |             |         |             |                  |                           |                               | 0.00         |                  |             |                |              |                               |          | 0.00        |
|                                    |             |               |         |                       |             |         |             |                  |                           |                               | 0.00         |                  |             |                |              |                               |          | 0.00        |
|                                    |             |               |         |                       |             |         |             |                  |                           |                               | 0.00         |                  |             |                |              |                               |          | 0.00        |
|                                    |             |               |         |                       |             |         |             |                  |                           |                               | 0.00         |                  |             |                |              |                               |          | 0.00        |
|                                    |             |               |         |                       |             |         |             |                  |                           |                               | 0.00         |                  |             |                |              |                               |          | 0.00        |
| <b>Total</b>                       | <b>1.25</b> | <b>128.13</b> |         |                       | <b>0.05</b> |         | <b>0.00</b> |                  |                           |                               | <b>23.70</b> |                  | <b>0.00</b> |                |              |                               |          | <b>0.00</b> |

Step Cumulative

|                                   |       |       |
|-----------------------------------|-------|-------|
| Yield                             | 96.0  | 99.0  |
| Conversion                        | 100.0 | /     |
| Selectivity                       | 96.0  | /     |
| AE                                | 103.1 | 100.0 |
| RME                               | 40.2  | 40.2  |
| PMI total                         | 49.7  | 49.7  |
| PMI Reaction                      | 49.7  | 49.7  |
| PMI reactants, reagents, catalyst | 2.6   | 2.6   |
| PMI reaction solvents             | 47.1  | 47.1  |
| PMI Workup                        | 0.0   | 0.0   |
| PMI Workup chemical               | 0.0   | 0.0   |
| PMI workup solvents               | 0.0   | 0.0   |

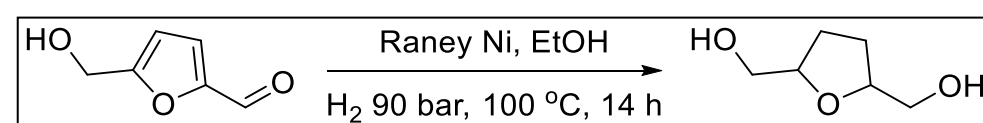

|                             | Mass    | MW     | Mol     |
|-----------------------------|---------|--------|---------|
| Product                     | 0.50300 | 132.16 | 0.00381 |
| Unreacted limiting reactant | mass    |        |         |

### Experimental:

Angew. Chem. Int. Ed. 2011, 50, 7083–7087, DOI: 10.1002/anie.201102156

HMF (500 mg, 4 mmol) dissolved in ethanol (30 mL) and Raney nickel catalyst (50 mg) were added to a 100 mL stainless steel autoclave (Parr). The reactor was flushed three times with nitrogen and subsequently with hydrogen. After flushing, the reactor was pressurized to 90 bar, and the reaction mixture was stirred and heated to 100 C for 14 h. GC analysis showed 100% conversion and 99% selectivity to THFDM.

### Solvents (First Pass)

| Preferred solvents                                                                         | water, EtOH, nBuOH, AcOipr, AcOnBu, PhOMe, MeOH, tBuOH, BnOH, ethylene glycol, acetone, MEK, MIBK, AcOEt, sulfolane | List solvents below |
|--------------------------------------------------------------------------------------------|---------------------------------------------------------------------------------------------------------------------|---------------------|
| Problematic solvents: (acceptable only if substitution does not offer)                     | DMSO, cyclohexanone, DMPU, AcOH, Ac2O, Acetonitrile, AcOMe, THF, heptane, Me-cyclohexane, toluene, xylene,          | EtOH                |
| Hazardous solvents: These solvents have significant health and/or safety                   | dioxane, pentane, TEA, diisopropyl ether, DME, DCM, DMF, DMA, NMP, methoxyethanol, hexane                           |                     |
| Highly hazardous solvents: The solvents which are agreed not to be used, even in screening | Et <sub>2</sub> O, Benzene, CCl <sub>4</sub> , chloroform, DCE, nitromethane, CS <sub>2</sub> , HMPA                |                     |

### Catalyst/enzyme (First Pass)

|                                                                                 |            | Tick |
|---------------------------------------------------------------------------------|------------|------|
| Catalyst or enzyme used, or reaction takes place without any catalyst/reagents. | Green Flag | x    |
| Use of stoichiometric quantities of reagents                                    | Amber Flag |      |
| Use of reagents in excess                                                       | Red Flag   |      |

|                                    |            | Tick |
|------------------------------------|------------|------|
| Facile recovery of catalyst/enzyme | Green Flag | X    |
| catalyst/enzyme not recovered      | Amber Flag |      |

**Critical elements**

| Supply remaining | Flag colour | Note element |
|------------------|-------------|--------------|
| 5-50 years       | Red Flag    |              |
| 50-500 years     | Amber Flag  | Ni           |
| +500 years       | Green Flag  |              |

| Energy (First Pass)                          |            | Tick |
|----------------------------------------------|------------|------|
| Reaction run between 0 to 70°C               | Green Flag |      |
| Reaction run between -20 to 0 or 70 to 140°C | Amber Flag | x    |
| Reaction run below -20 or above 140°C        | Red Flag   |      |

| Batch/flow |            | Tick |
|------------|------------|------|
| Flow       | Green Flag |      |
| Batch      | Amber Flag | x    |

|                                                          |            | Tick |
|----------------------------------------------------------|------------|------|
| Reaction run at reflux                                   | Red Flag   | x    |
| Reaction run 5°C or more below the solvent boiling point | Green Flag |      |

| Work Up                                                                                                                                  |            | List |
|------------------------------------------------------------------------------------------------------------------------------------------|------------|------|
| quenching<br>filtration<br>centrifugation<br>crystallisation                                                                             | Green Flag | X    |
| Low temperature distillation/evaporation/<br>sublimation (< 140 °C at atmospheric<br>solvent exchange, quenching into aqueous<br>solvent | Amber Flag |      |
| chromatography/ion exchange<br>high temperature<br>multiple recrystallisation                                                            | Red Flag   |      |

**Health & safety**

|                                   | Red Flag                     | Amber Flag                   | Green Flag                                                 | List substances and H-codes                    | List substances and H-codes | List substances and H-codes |  |
|-----------------------------------|------------------------------|------------------------------|------------------------------------------------------------|------------------------------------------------|-----------------------------|-----------------------------|--|
| <b>Highly explosive</b>           | H200, H201, H202, H203       | H205, H220, H224             | If no red or amber flagged H codes present then green flag | Raney nickel cat. H251, H317, H351, H372, H412 | Hydrogen gas H220 - H280    | Ethanol H225, H319          |  |
| <b>Explosive thermal runaway</b>  | H230, H240, H250             | H241                         |                                                            |                                                |                             |                             |  |
| <b>Toxic</b>                      | H300, H310, H330             | H301, H311, H331,            |                                                            |                                                |                             |                             |  |
| <b>Long Term toxicity</b>         | H340, H350, H360, H370, H372 | H341, H351, H361, H371, H373 |                                                            |                                                |                             |                             |  |
| <b>Environmental implications</b> | H400, H410, H411, H420       | H401, H412                   |                                                            |                                                |                             |                             |  |

**Use of chemicals of environmental concern**

|                                                                                      | Red Flag | List substances of very high concern |
|--------------------------------------------------------------------------------------|----------|--------------------------------------|
| Chemical identified as Substances of Very High Concern by ChemSec which are utilised | Red Flag |                                      |

## Bio-based approach: Step II

Yield, AE, RME, MI/PMI and OE

| Reactant (Limiting Reactant First) | Mass (g)    | MW            | Mol     | Catalyst                        | Mass (g)    | Reagent | Mass (g)    | Reaction solvent | Volume (cm <sup>3</sup> ) | Density (g ml <sup>-1</sup> ) | Mass (g)    | Work up chemical | Mass (g)    | Workup solvent | Volume (cm <sup>3</sup> ) | Density (g ml <sup>-1</sup> ) | Mass (g) |             |
|------------------------------------|-------------|---------------|---------|---------------------------------|-------------|---------|-------------|------------------|---------------------------|-------------------------------|-------------|------------------|-------------|----------------|---------------------------|-------------------------------|----------|-------------|
| THFDM                              | 0.100       | 132.16        | 0.0008  | Rh-Re/SiO <sub>2</sub> catalyst | 0.025       |         |             | water            | 2.00                      | 1.00                          | 2.00        |                  |             |                |                           |                               |          | 0.00        |
| hydrogen gas                       | 0.55        | 2.02          | 0.27228 | Nafion SAC-13 catalyst          | 0.02        |         |             |                  |                           |                               | 0.00        |                  |             |                |                           |                               |          | 0.00        |
|                                    |             |               |         |                                 |             |         |             |                  |                           |                               | 0.00        |                  |             |                |                           |                               |          | 0.00        |
|                                    |             |               |         |                                 |             |         |             |                  |                           |                               | 0.00        |                  |             |                |                           |                               |          | 0.00        |
|                                    |             |               |         |                                 |             |         |             |                  |                           |                               | 0.00        |                  |             |                |                           |                               |          | 0.00        |
|                                    |             |               |         |                                 |             |         |             |                  |                           |                               | 0.00        |                  |             |                |                           |                               |          | 0.00        |
| <b>Total</b>                       | <b>0.65</b> | <b>134.18</b> |         |                                 | <b>0.04</b> |         | <b>0.00</b> |                  |                           |                               | <b>2.00</b> |                  | <b>0.00</b> |                |                           |                               |          | <b>0.00</b> |

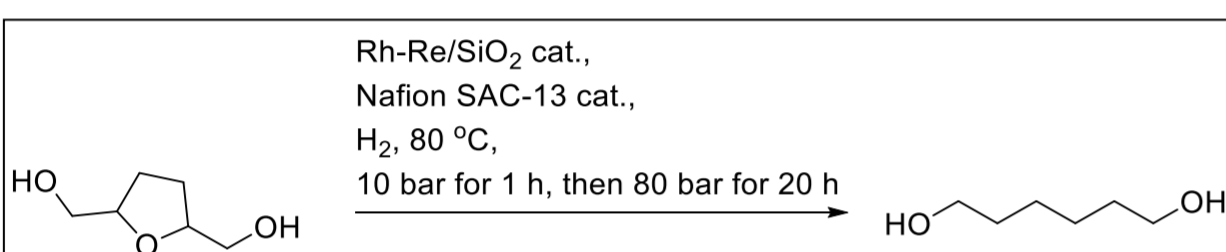

|                                   | Step  | Cumulative |
|-----------------------------------|-------|------------|
| Yield                             | 88.9  | 88.0       |
| Conversion                        | 100.0 | /          |
| Selectivity                       | 88.9  | /          |
| AE                                | 88.1  | 88.1       |
| RME                               | 12.2  | 9.96       |
| PMI total                         | 33.8  | 95.10      |
| PMI Reaction                      | 33.8  | 95.10      |
| PMI reactants, reagents, catalyst | 8.7   | 10.67      |
| PMI reaction solvents             | 25.2  | 84.424     |
| PMI Workup                        | 0.0   | 0.000      |
| PMI Workup chemical               | 0.0   | 0.000      |
| PMI workup solvents               | 0.0   | 0.000      |

| Product                     | Mass    | MW     | Mol     |
|-----------------------------|---------|--------|---------|
|                             | 0.07950 | 118.17 | 0.00067 |
| Unreacted limiting reactant | mass    |        |         |

### Experimental:

Angew. Chem. Int. Ed. 2011, 50, 7083–7087, DOI: 10.1002/anie.201102156

The same procedure was used as described above for the hydrogenation of THFDM to 1,2,6-HT, but with an additional 15 mg of acid catalyst added. THFDM (100 mg, 0.8 mmol), Rh-Re/SiO<sub>2</sub> catalyst (25 mg), water (2 mL), and a Teflon stirring bar were added to a 8 mL glass vial capped with a septum. The vial was then pierced with a small needle and placed in a stainless steel autoclave. The lid of the autoclave was closed and stirring was started at 1000 rpm. After pressurizing three times with first nitrogen and then hydrogen, the autoclave was pressurized to 10 bar and the temperature was raised to 80 °C. After 1 h, the pressure was raised to 80 bar and the reactions were continued for 20 h. The autoclave was then allowed to cool to ambient temperature and the pressure was released.

### Solvents (First Pass)

| Preferred solvents                                                                         | water, EtOH, nBuOH, AcOipr, AcOnBu, PhOMe, MeOH, tBuOH, BnOH, ethylene glycol, acetone, MEK, MIBK, AcOEt, sulfolane                        | List solvents below |
|--------------------------------------------------------------------------------------------|--------------------------------------------------------------------------------------------------------------------------------------------|---------------------|
| Problematic solvents: (acceptable only if substitution does not offer)                     | DMSO, cyclohexanone, DMPU, AcOH, Ac <sub>2</sub> O, Acetonitrile, AcOMe, THF, heptane, Me-cyclohexane, toluene, xylene, MTBE, cyclohexane, | water               |
| Hazardous solvents: These solvents have significant health and/or safety concerns.         | dioxane, pentane, TEA, diisopropyl ether, DME, DCM, DMF, DMA, NMP, methoxyethanol, hexane                                                  |                     |
| Highly hazardous solvents: The solvents which are agreed not to be used, even in screening | Et <sub>2</sub> O, Benzene, CCl <sub>4</sub> , chloroform, DCE, nitromethane, CS <sub>2</sub> , HMPA                                       |                     |

### Catalyst/enzyme (First Pass)

|                                                                                 |            | Tick |
|---------------------------------------------------------------------------------|------------|------|
| Catalyst or enzyme used, or reaction takes place without any catalyst/reagents. | Green Flag | x    |
| Use of stoichiometric quantities of reagents                                    | Amber Flag |      |
| Use of reagents in excess                                                       | Red Flag   |      |

|                                    |            | Tick |
|------------------------------------|------------|------|
| Facile recovery of catalyst/enzyme | Green Flag | x    |
| catalyst/enzyme not recovered      | Amber Flag |      |

**Critical elements**

| Supply remaining | Flag colour | Note element |
|------------------|-------------|--------------|
| 5-50 years       | Red Flag    | Rh           |
| 50-500 years     | Amber Flag  | Re           |
| +500 years       | Green Flag  |              |

| Energy (First Pass)                          |            | Tick |
|----------------------------------------------|------------|------|
| Reaction run between 0 to 70°C               | Green Flag |      |
| Reaction run between -20 to 0 or 70 to 140°C | Amber Flag | x    |
| Reaction run below -20 or above 140°C        | Red Flag   |      |

| Batch/flow |            | Tick |
|------------|------------|------|
| Flow       | Green Flag |      |
| Batch      | Amber Flag | x    |

|                                                          |            | Tick |
|----------------------------------------------------------|------------|------|
| Reaction run at reflux                                   | Red Flag   |      |
| Reaction run 5°C or more below the solvent boiling point | Green Flag | X    |

| Work Up                                                                                                                                            |            | List |
|----------------------------------------------------------------------------------------------------------------------------------------------------|------------|------|
| quenching<br>filtration<br>centrifugation<br>crystallisation<br>Low temperature distillation/evaporation/<br>sublimation (< 140 °C at atmospheric) | Green Flag | X    |
| solvent exchange, quenching into aqueous solvent                                                                                                   | Amber Flag |      |
| chromatography/ion exchange<br>high temperature<br>multiple recrystallisation                                                                      | Red Flag   |      |

**Health & safety**

|                            | Red Flag                     | Amber Flag                   | Green Flag                                                 | List substances and H-codes | List substances and H-codes | List substances and H-codes |
|----------------------------|------------------------------|------------------------------|------------------------------------------------------------|-----------------------------|-----------------------------|-----------------------------|
| Highly explosive           | H200, H201, H202, H203       | H205, H220, H224             | If no red or amber flagged H codes present then green flag |                             | Hydrogen gas H220 - H280    |                             |
| Explosive thermal runaway  | H230, H240, H250             | H241                         |                                                            |                             |                             |                             |
| Toxic                      | H300, H310, H330             | H301, H311, H331,            |                                                            |                             |                             |                             |
| Long Term toxicity         | H340, H350, H360, H370, H372 | H341, H351, H361, H371, H373 |                                                            |                             |                             |                             |
| Environmental implications | H400, H410, H411, H420       | H401, H412                   |                                                            |                             |                             |                             |

**Use of chemicals of environmental concern**
**List substances of very high concern**

|                                                                                      |          |  |
|--------------------------------------------------------------------------------------|----------|--|
| Chemical identified as Substances of Very High Concern by ChemSec which are utilised | Red Flag |  |
|--------------------------------------------------------------------------------------|----------|--|



## Bio-based approach: Step III

Yield, AE, RME, MI/PMI and OE

| Reactant (Limiting Reactant First) | Mass (g)      | MW            | Mol    | Catalyst         | Mass (g)      | Reagent | Mass (g)    | Reaction solvent | Volume (cm <sup>3</sup> ) | Density (g ml <sup>-1</sup> ) | Mass (g)     | Work up chemical | Mass (g)    | Workup solvent | Volume (cm <sup>3</sup> ) | Density (g ml <sup>-1</sup> ) | Mass (g) |             |
|------------------------------------|---------------|---------------|--------|------------------|---------------|---------|-------------|------------------|---------------------------|-------------------------------|--------------|------------------|-------------|----------------|---------------------------|-------------------------------|----------|-------------|
| 1,6-hexanediol                     | 0.8100        | 118.17        | 0.0069 | Ru-acridine cat. | 0.0310        |         |             | toluene          | 20.00                     | 0.87                          | 17.30        |                  |             |                |                           |                               |          | 0.00        |
| ammonia gas                        | 0.3747        | 17.03         | 0.0220 |                  |               |         |             |                  |                           |                               | 0.00         |                  |             |                |                           |                               |          | 0.00        |
|                                    |               |               |        |                  |               |         |             |                  |                           |                               | 0.00         |                  |             |                |                           |                               |          | 0.00        |
|                                    |               |               |        |                  |               |         |             |                  |                           |                               | 0.00         |                  |             |                |                           |                               |          | 0.00        |
|                                    |               |               |        |                  |               |         |             |                  |                           |                               | 0.00         |                  |             |                |                           |                               |          | 0.00        |
|                                    |               |               |        |                  |               |         |             |                  |                           |                               | 0.00         |                  |             |                |                           |                               |          | 0.00        |
| <b>Total</b>                       | <b>1.1847</b> | <b>135.20</b> |        |                  | <b>0.0310</b> |         | <b>0.00</b> |                  |                           |                               | <b>17.30</b> |                  | <b>0.00</b> |                |                           |                               |          | <b>0.00</b> |

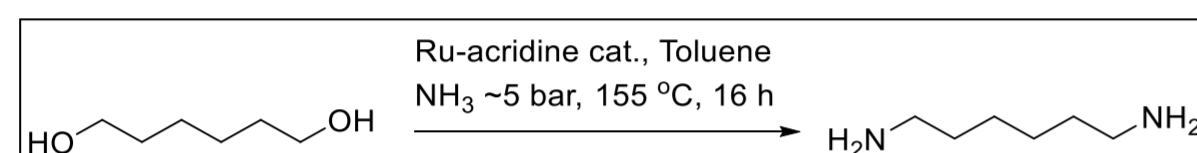

|                                   | Step  | Cumulative |
|-----------------------------------|-------|------------|
| Yield                             | 82.9  | 70.7       |
| Conversion                        | 100.0 | /          |
| Selectivity                       | 82.9  | /          |
| AE                                | 85.9  | 79.0       |
| RME                               | 55.7  | 7.76       |
| PMI total                         | 28.1  | 143.54     |
| PMI Reaction                      | 28.1  | 143.54     |
| PMI reactants, reagents, catalyst | 1.8   | 13.71      |
| PMI reaction solvents             | 26.2  | 129.824    |
| PMI Workup                        | 0.0   | 0.000      |
| PMI Workup chemical               | 0.0   | 0.000      |
| PMI workup solvents               | 0.0   | 0.000      |

|                             | Mass | MW     | Mol    |
|-----------------------------|------|--------|--------|
| Product                     | 0.66 | 116.20 | 0.0057 |
|                             | mass |        |        |
| Unreacted limiting reactant | 0.00 |        |        |

**Experimental:** ACS Catal. 2016, 6, 2802-2810 DOI: 10.1021/acscatal.6b00189

An 810 mg portion (6.9 mmol) of 1,6-hexanediol was mixed in a Premex steel autoclave with 31 mg of chlorocarbonylhydrido[4,5-bis(dicyclohexylphosphinomethyl)-acridine]ruthenium(II) and 20 mL of toluene. The autoclave was closed, cooled to 0 °C, and pressurized for 1 h with ammonia gas (~5 bar). The autoclave was heated to 155 °C and stirred for 16 h. After the mixture was cooled, the solvent was removed in vacuo and the product mixture analyzed by NMR spectroscopy with naphthalene as internal standard. The amount of 1,6-hexanediamine in the crude mixture was 88% on the basis of used 1,6-hexanediol. After Kugelrohr distillation 660 mg of the product was obtained as colorless crystals.

### Solvents (First Pass)

| Preferred solvents                                                                                | water, EtOH, nBuOH, AcOipr, AcOnBu, PhOMe, MeOH, tBuOH, BnOH, ethylene glycol, acetone, MEK, MIBK, AcOEt, sulfolane                                                                             | List solvents below |
|---------------------------------------------------------------------------------------------------|-------------------------------------------------------------------------------------------------------------------------------------------------------------------------------------------------|---------------------|
| <b>Problematic solvents:</b> (acceptable only if substitution does not offer advantages)          | DMSO, cyclohexanone, DMPU, AcOH, Ac <sub>2</sub> O, Acetonitrile, AcOMe, THF, heptane, Me-cyclohexane, toluene, xylene, MTBE, <b>cyclohexane</b> , chlorobenzene, formic acid, pyridine, Me-THF | toluene             |
| <b>Hazardous solvents:</b> These solvents have significant health and/or safety concerns.         | dioxane, pentane, TEA, diisopropyl ether, DME, DCM, DMF, DMA, NMP, methoxyethanol, hexane                                                                                                       |                     |
| <b>Highly hazardous solvents:</b> The solvents which are agreed not to be used, even in screening | Et <sub>2</sub> O, Benzene, CCl <sub>4</sub> , chloroform, DCE, nitromethane, CS <sub>2</sub> , HMPA                                                                                            |                     |

### Catalyst/enzyme (First Pass)

|                                                                                        |            | Tick |
|----------------------------------------------------------------------------------------|------------|------|
| Catalyst or enzyme used, or reaction takes place without <b>any</b> catalyst/reagents. | Green Flag | x    |
| Use of stoichiometric quantities of reagents                                           | Amber Flag |      |
| Use of reagents in excess                                                              | Red Flag   |      |

|                                    |            | Tick |
|------------------------------------|------------|------|
| Facile recovery of catalyst/enzyme | Green Flag |      |
| catalyst/enzyme not recovered      | Amber Flag |      |

**Critical elements**

| Supply remaining | Flag colour | Note element |
|------------------|-------------|--------------|
| 5-50 years       | Red Flag    | Ru           |
| 50-500 years     | Amber Flag  | P            |
| +500 years       | Green Flag  |              |

| Energy (First Pass)                          |            | Tick |
|----------------------------------------------|------------|------|
| Reaction run between 0 to 70°C               | Green Flag |      |
| Reaction run between -20 to 0 or 70 to 140°C | Amber Flag |      |
| Reaction run below -20 or above 140°C        | Red Flag   | x    |

| Batch/flow |            | Tick |
|------------|------------|------|
| Flow       | Green Flag |      |
| Batch      | Amber Flag | X    |

|                                                          |            | Tick |
|----------------------------------------------------------|------------|------|
| Reaction run at reflux                                   | Red Flag   | x    |
| Reaction run 5°C or more below the solvent boiling point | Green Flag |      |

| Work Up                                                                                                                                  |            | List |
|------------------------------------------------------------------------------------------------------------------------------------------|------------|------|
| quenching<br>filtration<br>centrifugation<br>crystallisation                                                                             | Green Flag | x    |
| Low temperature distillation/evaporation/<br>sublimation (< 140 °C at atmospheric<br>solvent exchange, quenching into aqueous<br>solvent | Amber Flag |      |
| chromatography/ion exchange<br>high temperature<br>multiple recrystallisation                                                            | Red Flag   |      |

| Health & safety            | Red Flag                     | Amber Flag                   | Green Flag                                                 | List substances and H-codes    | List substances and H-codes                             | List substances and H-codes |
|----------------------------|------------------------------|------------------------------|------------------------------------------------------------|--------------------------------|---------------------------------------------------------|-----------------------------|
| Highly explosive           | H200, H201, H202, H203       | H205, H220, H224             | If no red or amber flagged H codes present then green flag | NH3 gas H280, H314, H331, H410 | Toluene H225 - H304 - H315 - H336 - H361d - H373 - H412 | Ru complex H315, H319, H335 |
| Explosive thermal runaway  | H230, H240, H250             | H241                         |                                                            |                                |                                                         |                             |
| Toxic                      | H300, H310, H330             | H301, H311, H331,            |                                                            |                                |                                                         |                             |
| Long Term toxicity         | H340, H350, H360, H370, H372 | H341, H351, H361, H371, H373 |                                                            |                                |                                                         |                             |
| Environmental implications | H400, H410, H411, H420       | H401, H412                   |                                                            |                                |                                                         |                             |

| Use of chemicals of environmental concern                                            |          | List substances of very high concern |
|--------------------------------------------------------------------------------------|----------|--------------------------------------|
| Chemical identified as Substances of Very High Concern by ChemSec which are utilised | Red Flag |                                      |

## Bio-based approach: Step A

Yield, AE, RME, MI/PMI and OE

| Reactant (Limiting Reactant First) | Mass (g)    | MW            | Mol    | Catalyst                | Mass (g)    | Reagent    | Mass (g)    | Reaction solvent | Volume (cm <sup>3</sup> ) | Density (g ml <sup>-1</sup> ) | Mass (g)    | Work up chemical | Mass (g)    | Workup solvent | Volume (cm <sup>3</sup> ) | Density (g ml <sup>-1</sup> ) | Mass (g) |             |
|------------------------------------|-------------|---------------|--------|-------------------------|-------------|------------|-------------|------------------|---------------------------|-------------------------------|-------------|------------------|-------------|----------------|---------------------------|-------------------------------|----------|-------------|
| 5-HMF                              | 0.060       | 126.11        | 0.0005 | N-MnO <sub>2</sub> (80) | 0.150       | oxygen gas | 4.12        | toluene          | 2.00                      | 0.87                          | 1.73        |                  |             |                |                           |                               |          | 0.00        |
|                                    |             |               |        |                         |             |            |             |                  |                           |                               | 0.00        |                  |             |                |                           |                               |          | 0.00        |
|                                    |             |               |        |                         |             |            |             |                  |                           |                               | 0.00        |                  |             |                |                           |                               |          | 0.00        |
|                                    |             |               |        |                         |             |            |             |                  |                           |                               | 0.00        |                  |             |                |                           |                               |          | 0.00        |
|                                    |             |               |        |                         |             |            |             |                  |                           |                               | 0.00        |                  |             |                |                           |                               |          | 0.00        |
|                                    |             |               |        |                         |             |            |             |                  |                           |                               | 0.00        |                  |             |                |                           |                               |          | 0.00        |
| <b>Total</b>                       | <b>0.06</b> | <b>126.11</b> |        |                         | <b>0.15</b> |            | <b>4.12</b> |                  |                           |                               | <b>1.73</b> |                  | <b>0.00</b> |                |                           |                               |          | <b>0.00</b> |

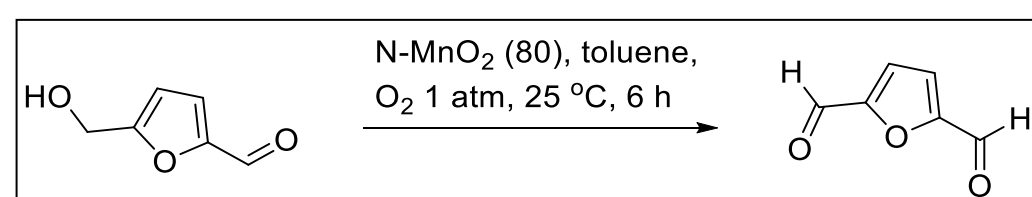

|                                   | Step  | Cumulative |
|-----------------------------------|-------|------------|
| Yield                             | 99.9  | 99.9       |
| Conversion                        | 100.0 | /          |
| Selectivity                       | 99.9  | /          |
| AE                                | 98.4  | 98.4       |
| RME                               | 98.3  | 98.3       |
| PMI total                         | 102.7 | 102.7      |
| PMI Reaction                      | 102.7 | 102.7      |
| PMI reactants, reagents, catalyst | 73.3  | 73.3       |
| PMI reaction solvents             | 29.4  | 29.4       |
| PMI Workup                        | 0.0   | 0.0        |
| PMI Workup chemical               | 0.0   | 0.0        |
| PMI workup solvents               | 0.0   | 0.0        |

| Product                     | Mass  | MW     | Mol     |
|-----------------------------|-------|--------|---------|
|                             | 0.059 | 124.09 | 0.00048 |
| Unreacted limiting reactant | mass  |        |         |

### Experimental:

Qingping Ke, Yangxin Jin, Fei Ruan, Minh Ngoc Ha, Dandan Li, Peixin Cui, Yali Cao, Hao Wang, Tongtong Wang, Van Noi Nguyen, Xinya Han, Xi Wang, Ping Cui, Boosting the activity of catalytic oxidation of 5-hydroxymethylfurfural to 2,5-diformylfuran over nitrogen-doped manganese oxide catalysts, Green Chem., 2019,21, 4313-4318, <https://doi.org/10.1039/C9GC01041F>

The mixtures of HMF (60 mg, 0.5 mmol), N-MnO<sub>2</sub> (80) catalyst (150 mg), and toluene (2 mL) were added in a 10 mL Schlenk tube at 25±2 °C for 6 h, the oxygen with flux of 8 mL/min was bubbled in the tube by Internal pipeline. Afterwards, the catalyst was separated from the mixture by filtration. The crude products without further purification, and their reactant conversions and product selectivities were determined by a chromatograph-mass spectrometer (Agilent 7890B, USA), and 1H NMR spectra recorded on a BrukerALX400 spectrometer operating at 400 MHz.

### Solvents (First Pass)

| Preferred solvents                                                                                | water, EtOH, nBuOH, AcOipr, AcOnBu, PhOMe, MeOH, tBuOH, BnOH, ethylene glycol, acetone, MEK, MIBK, AcOEt, sulfolane                                                                     | List solvents below |
|---------------------------------------------------------------------------------------------------|-----------------------------------------------------------------------------------------------------------------------------------------------------------------------------------------|---------------------|
| <b>Problematic solvents:</b> (acceptable only if substitution does not offer advantages)          | DMSO, cyclohexanone, DMPU, AcOH, Ac <sub>2</sub> O, Acetonitrile, AcOMe, THF, heptane, Me-cyclohexane, toluene, xylene, MTBE, cyclohexane, chlorobenzene, formic acid, pyridine, Me-THF | toluene             |
| <b>Hazardous solvents:</b> These solvents have significant health and/or safety concerns.         | dioxane, pentane, TEA, diisopropyl ether, DME, DCM, DMF, DMA, NMP, methoxyethanol, hexane                                                                                               |                     |
| <b>Highly hazardous solvents:</b> The solvents which are agreed not to be used, even in screening | Et <sub>2</sub> O, Benzene, CCl <sub>4</sub> , chloroform, DCE, nitromethane, CS <sub>2</sub> , HMPA                                                                                    |                     |

### Catalyst/enzyme (First Pass)

|                                                                                 |            | Tick |
|---------------------------------------------------------------------------------|------------|------|
| Catalyst or enzyme used, or reaction takes place without any catalyst/reagents. | Green Flag | x    |
| Use of stoichiometric quantities of reagents                                    | Amber Flag |      |
| Use of reagents in excess                                                       | Red Flag   |      |

|                                    |            | Tick |
|------------------------------------|------------|------|
| Facile recovery of catalyst/enzyme | Green Flag | x    |
| catalyst/enzyme not recovered      | Amber Flag |      |

**Critical elements**

| Supply remaining | Flag colour | Note element |
|------------------|-------------|--------------|
| 5-50 years       | Red Flag    | Mn           |
| 50-500 years     | Amber Flag  |              |
| +500 years       | Green Flag  |              |

| Energy (First Pass)                          |            | Tick |
|----------------------------------------------|------------|------|
| Reaction run between 0 to 70°C               | Green Flag | x    |
| Reaction run between -20 to 0 or 70 to 140°C | Amber Flag |      |
| Reaction run below -20 or above 140°C        | Red Flag   |      |

| Batch/flow |            | Tick |
|------------|------------|------|
| Flow       | Green Flag |      |
| Batch      | Amber Flag | x    |

|                                                          |            | Tick |
|----------------------------------------------------------|------------|------|
| Reaction run at reflux                                   | Red Flag   |      |
| Reaction run 5°C or more below the solvent boiling point | Green Flag | x    |

| Work Up                                                                                                                                  |            | List |
|------------------------------------------------------------------------------------------------------------------------------------------|------------|------|
| quenching<br>filtration<br>centrifugation<br>crystallisation                                                                             | Green Flag | x    |
| Low temperature distillation/evaporation/<br>sublimation (< 140 °C at atmospheric<br>solvent exchange, quenching into aqueous<br>solvent | Amber Flag |      |
| chromatography/ion exchange<br>high temperature<br>multiple recrystallisation                                                            | Red Flag   |      |

| Health & safety                   | Red Flag                     | Amber Flag                   | Green Flag                                                 | List substances and H-codes | List substances and H-codes | List substances and H-codes                             |  |
|-----------------------------------|------------------------------|------------------------------|------------------------------------------------------------|-----------------------------|-----------------------------|---------------------------------------------------------|--|
| <b>Highly explosive</b>           | H200, H201, H202, H203       | H205, H220, H224             | If no red or amber flagged H codes present then green flag |                             | MnO2 H302 + H332, H373      | Oxygen gas H270 - H280                                  |  |
| <b>Explosive thermal runaway</b>  | H230, H240, H250             | H241                         |                                                            |                             |                             | Toluene H225 - H304 - H315 - H336 - H361d - H373 - H412 |  |
| <b>Toxic</b>                      | H300, H310, H330             | H301, H311, H331,            |                                                            |                             |                             |                                                         |  |
| <b>Long Term toxicity</b>         | H340, H350, H360, H370, H372 | H341, H351, H361, H371, H373 |                                                            |                             |                             |                                                         |  |
| <b>Environmental implications</b> | H400, H410, H411, H420       | H401, H412                   |                                                            |                             |                             |                                                         |  |

| Use of chemicals of environmental concern                                            |          | List substances of very high concern |
|--------------------------------------------------------------------------------------|----------|--------------------------------------|
| Chemical identified as Substances of Very High Concern by ChemSec which are utilised | Red Flag |                                      |

## Bio-based approach: Step B

Yield, AE, RME, MI/PMI and OE

| Reactant (Limiting Reactant First) | Mass (g)    | MW            | Mol     | Catalyst            | Mass (g)    | Reagent      | Mass (g)     | Reaction solvent | Volume (cm <sup>3</sup> ) | Density (g ml <sup>-1</sup> ) | Mass (g)    | Work up chemical | Mass (g)    | Workup solvent | Volume (cm <sup>3</sup> ) | Density (g ml <sup>-1</sup> ) | Mass (g)     |
|------------------------------------|-------------|---------------|---------|---------------------|-------------|--------------|--------------|------------------|---------------------------|-------------------------------|-------------|------------------|-------------|----------------|---------------------------|-------------------------------|--------------|
| DFF                                | 0.031       | 124.09        | 0.00025 | Co/ZrO <sub>2</sub> | 0.030       | N-butylamine | 0.055        | MeOH             | 3.80                      | 0.79                          | 3.00        |                  |             | DCM            | 5.00                      | 1.33                          | 6.65         |
| ammonia gas                        | 0.2         | 17.03         | 0.01251 |                     |             |              |              |                  |                           |                               | 0.00        |                  |             | water          | 5.00                      | 1.00                          | 5.00         |
| hydrogen gas                       | 0.08        | 2.02          | 0.04    |                     |             |              |              |                  |                           |                               | 0.00        |                  |             |                |                           |                               | 0.00         |
|                                    |             |               |         |                     |             |              |              |                  |                           |                               | 0.00        |                  |             |                |                           |                               | 0.00         |
|                                    |             |               |         |                     |             |              |              |                  |                           |                               | 0.00        |                  |             |                |                           |                               | 0.00         |
|                                    |             |               |         |                     |             |              |              |                  |                           |                               | 0.00        |                  |             |                |                           |                               | 0.00         |
| <b>Total</b>                       | <b>0.33</b> | <b>143.14</b> |         |                     | <b>0.03</b> |              | <b>0.055</b> |                  |                           |                               | <b>3.00</b> |                  | <b>0.00</b> |                |                           |                               | <b>11.65</b> |

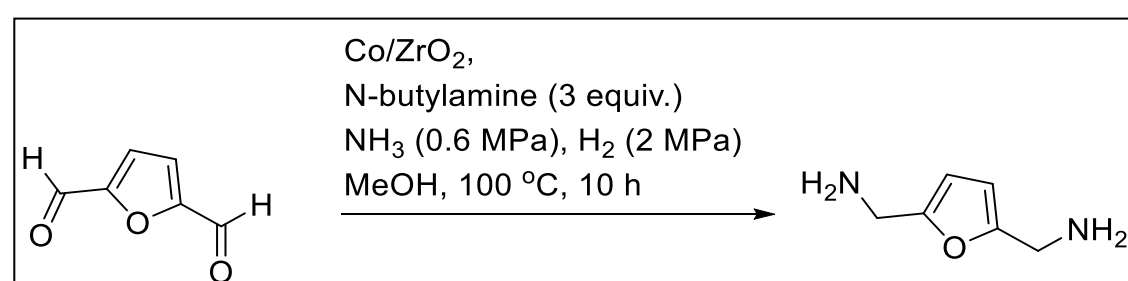

|                                   | Step  | Cumulative |
|-----------------------------------|-------|------------|
| Yield                             | 94.9  | 94.8       |
| Conversion                        | 100.0 | /          |
| Selectivity                       | 94.9  | /          |
| AE                                | 88.1  | 86.9       |
| RME                               | 9.1   | 9.10       |
| PMI total                         | 503.8 | 609.28     |
| PMI Reaction                      | 114.2 | 219.65     |
| PMI reactants, reagents, catalyst | 13.8  | 88.78      |
| PMI reaction solvents             | 100.4 | 130.872    |
| PMI Workup                        | 389.6 | 389.632    |
| PMI Workup chemical               | 0.0   | 0.000      |
| PMI workup solvents               | 389.6 | 389.632    |

|                             | Mass  | MW     | Mol     |
|-----------------------------|-------|--------|---------|
| Product                     | 0.030 | 126.15 | 0.00024 |
| Unreacted limiting reactant | mass  |        |         |

### Experimental:

Haifeng Qi, Fei Liu, Leilei Zhang, Lin Li, Yang Su, Jingyi Yang, Rui Hao, Aiqin Wang, Tao Zhang, Modulating trans-amination and hydrogenation towards the highly selective production of primary diamines from dialdehydes, *Green Chem.*, 2020,22, 6897-6901, DOI <https://doi.org/10.1039/D0GC02280B>

In the typical reaction for reductive amination of dialdehydes, 0.25 mmol 2,5-diformylfuran (DFF) (Bidepharm), 0.75 mmol butylamine, 30 mg catalyst, and 3 g methanol were put into an autoclave (Parr reactor with a volume of 50 mL). The autoclave was purged with NH<sub>3</sub> for three times, and charged with 0.6 MPa NH<sub>3</sub> and 2 MPa H<sub>2</sub> at room temperature. After sealing the autoclave, the reaction mixture was stirred at a rate of 800 r/min and heated at 373 K for 10 h with continuous stirring. After the reaction, the liquid-phase products were analyzed with a GC system (Agilent 7890A) equipped with a HP-5 column (30 m × 0.25 μm × 0.25 mm i.d.) and a FID detector by using dodecane as an internal standard.

After the typical reaction, the Co/ZrO<sub>2</sub> catalyst was removed by centrifugation, and the upper liquid was distilled by rotatory evaporator. Then, 5 ml CH<sub>2</sub>Cl<sub>2</sub> and 5 ml H<sub>2</sub>O were add to the residue, and the BAMF was extracted in H<sub>2</sub>O phase. The pure BAMF solid was obtained by recrystallization

### Solvents (First Pass)

|                                                                                                   |                                                                                                                                                                                         | List solvents below |
|---------------------------------------------------------------------------------------------------|-----------------------------------------------------------------------------------------------------------------------------------------------------------------------------------------|---------------------|
| <b>Preferred solvents</b>                                                                         | water, EtOH, nBuOH, AcOipr, AcOnBu, PhOMe, MeOH, tBuOH, BnOH, ethylene glycol, acetone, MEK, MIBK, AcOEt, sulfolane                                                                     | MeOH, water         |
| <b>Problematic solvents:</b> (acceptable only if substitution does not offer advantages)          | DMSO, cyclohexanone, DMPU, AcOH, Ac <sub>2</sub> O, Acetonitrile, AcOMe, THF, heptane, Me-cyclohexane, toluene, xylene, MTBE, cyclohexane, chlorobenzene, formic acid, pyridine, Me-THF |                     |
| <b>Hazardous solvents:</b> These solvents have significant health and/or safety concerns.         | dioxane, pentane, TEA, diisopropyl ether, DME, DCM, DMF, DMA, NMP, methoxyethanol, hexane                                                                                               | DCM                 |
| <b>Highly hazardous solvents:</b> The solvents which are agreed not to be used, even in screening | Et <sub>2</sub> O, Benzene, CCl <sub>4</sub> , chloroform, DCE, nitromethane, CS <sub>2</sub> , HMPA                                                                                    |                     |

### Catalyst/enzyme (First Pass)

|                                                                                 |            | Tick |
|---------------------------------------------------------------------------------|------------|------|
| Catalyst or enzyme used, or reaction takes place without any catalyst/reagents. | Green Flag | x    |
| Use of stoichiometric quantities of reagents                                    | Amber Flag |      |
| Use of reagents in excess                                                       | Red Flag   |      |

|                                    |            | Tick |
|------------------------------------|------------|------|
| Facile recovery of catalyst/enzyme | Green Flag | x    |
| catalyst/enzyme not recovered      | Amber Flag |      |

**Critical elements**

| Supply remaining | Flag colour | Note element |
|------------------|-------------|--------------|
| 5-50 years       | Red Flag    |              |
| 50-500 years     | Amber Flag  | Co, Zr       |
| +500 years       | Green Flag  |              |

**Energy (First Pass)**

|                                              |            | Tick |
|----------------------------------------------|------------|------|
| Reaction run between 0 to 70°C               | Green Flag |      |
| Reaction run between -20 to 0 or 70 to 140°C | Amber Flag | x    |
| Reaction run below -20 or above 140°C        | Red Flag   |      |

**Batch/flow**

|       |            | Tick |
|-------|------------|------|
| Flow  | Green Flag |      |
| Batch | Amber Flag | x    |

|                                                          |            | Tick |
|----------------------------------------------------------|------------|------|
| Reaction run at reflux                                   | Red Flag   | x    |
| Reaction run 5°C or more below the solvent boiling point | Green Flag |      |

**Work Up**

|                                                                                                                                          |            | List |
|------------------------------------------------------------------------------------------------------------------------------------------|------------|------|
| quenching<br>filtration<br>centrifugation<br>crystallisation                                                                             | Green Flag | x    |
| Low temperature distillation/evaporation/<br>sublimation (< 140 °C at atmospheric<br>solvent exchange, quenching into aqueous<br>solvent | Amber Flag |      |
| chromatography/ion exchange<br>high temperature<br>multiple recrystallisation                                                            | Red Flag   |      |

**Health & safety**

|                                   | Red Flag                     | Amber Flag                   | Green Flag                                                 | List substances and H-codes           | List substances and H-codes | List substances and H-codes |
|-----------------------------------|------------------------------|------------------------------|------------------------------------------------------------|---------------------------------------|-----------------------------|-----------------------------|
| <b>Highly explosive</b>           | H200, H201, H202, H203       | H205, H220, H224             | If no red or amber flagged H codes present then green flag | NH3 gas H280, H314, H331, H410        | Hydrogen gas H220 - H280    |                             |
| <b>Explosive thermal runaway</b>  | H230, H240, H250             | H241                         |                                                            | MeOH H225 - H301 + H311 + H331 - H370 |                             |                             |
| <b>Toxic</b>                      | H300, H310, H330             | H301, H311, H331,            |                                                            |                                       |                             |                             |
| <b>Long Term toxicity</b>         | H340, H350, H360, H370, H372 | H341, H351, H361, H371, H373 |                                                            |                                       |                             |                             |
| <b>Environmental implications</b> | H400, H410, H411, H420       | H401, H412                   |                                                            |                                       |                             |                             |

**Use of chemicals of environmental concern**

|                                                                                      |          | List substances of very high concern |
|--------------------------------------------------------------------------------------|----------|--------------------------------------|
| Chemical identified as Substances of Very High Concern by ChemSec which are utilised | Red Flag |                                      |

## Bio-based approach: Step C

Yield, AE, RME, MI/PMI and OE

| Reactant (Limiting Reactant First) | Mass (g)    | MW            | Mol     | Catalyst | Mass (g)    | Reagent | Mass (g)    | Reaction solvent | Volume (cm <sup>3</sup> ) | Density (g ml <sup>-1</sup> ) | Mass (g)    | Work up chemical | Mass (g)    | Workup solvent | Volume (cm <sup>3</sup> ) | Density (g ml <sup>-1</sup> ) | Mass (g) |             |
|------------------------------------|-------------|---------------|---------|----------|-------------|---------|-------------|------------------|---------------------------|-------------------------------|-------------|------------------|-------------|----------------|---------------------------|-------------------------------|----------|-------------|
| FDA                                | 0.127       | 126.16        | 0.0010  | Raney Ni | 0.120       |         |             | MeOH             | 5.00                      | 0.79                          | 3.95        |                  |             |                |                           |                               |          | 0.00        |
| hydrogen gas                       | 0.050       | 2.02          | 0.02450 |          |             |         |             |                  |                           |                               | 0.00        |                  |             |                |                           |                               |          | 0.00        |
|                                    |             |               |         |          |             |         |             |                  |                           |                               | 0.00        |                  |             |                |                           |                               |          | 0.00        |
|                                    |             |               |         |          |             |         |             |                  |                           |                               | 0.00        |                  |             |                |                           |                               |          | 0.00        |
|                                    |             |               |         |          |             |         |             |                  |                           |                               | 0.00        |                  |             |                |                           |                               |          | 0.00        |
|                                    |             |               |         |          |             |         |             |                  |                           |                               | 0.00        |                  |             |                |                           |                               |          | 0.00        |
| <b>Total</b>                       | <b>0.18</b> | <b>128.18</b> |         |          | <b>0.12</b> |         | <b>0.00</b> |                  |                           |                               | <b>3.95</b> |                  | <b>0.00</b> |                |                           |                               |          | <b>0.00</b> |

|                                   | Step  | Cumulative |
|-----------------------------------|-------|------------|
| Yield                             | 88.5  | 83.9       |
| Conversion                        | 100.0 | /          |
| Selectivity                       | 88.5  | /          |
| AE                                | 101.6 | 88.4       |
| RME                               | 65.7  | 8.03       |
| PMI total                         | 36.6  | 702.57     |
| PMI Reaction                      | 36.6  | 275.99     |
| PMI reactants, reagents, catalyst | 2.6   | 98.66      |
| PMI reaction solvents             | 34.1  | 177.334    |
| PMI Workup                        | 0.0   | 426.580    |
| PMI Workup chemical               | 0.0   | 0.000      |
| PMI workup solvents               | 0.0   | 426.580    |

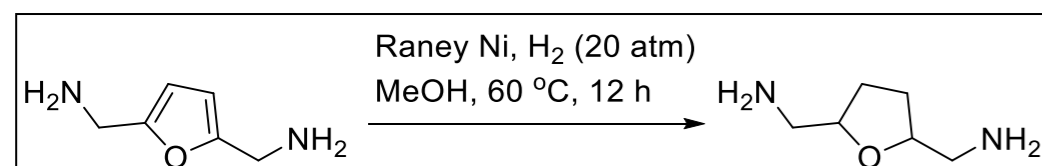

|                             | Mass  | MW     | Mol     |
|-----------------------------|-------|--------|---------|
| Product                     | 0.116 | 130.19 | 0.00089 |
| Unreacted limiting reactant | mass  |        |         |

### Experimental:

Peng Li, Armin T. Liebens, A process for producing a tetrahydrofuran compound comprising at least two amine functional groups, WO2018113599A1, 2017

Into a 30ml autoclave, 2,5-bis(aminomethyl)furan (127 mg, 1.01 mmol) and doped Raney Ni (120 mg) from Ningbo HanYi were added and dissolved in methanol (5 ml). The mixture was stirred at 60°C under 20 atms H<sub>2</sub> atmosphere for 12 h. The reaction mixture, after completion of the reaction, was analysed by GC and 2,5-bis(aminomethyl) tetrahydrofuran was obtained in 89% yield.

### Experimental:

Green Chem., 2015, 17, 4760–4772, DOI: 10.1039/c5gc01549a

The first step involves the oxidation of HMF into DFF. The second step involves the amination of DFF into AM-THF, which is similar to 1,6 HDO amination into HMDA previously described. The last step from AM-THF to HMDA has also been described previously. Dealing with the first step, DFF may be produced industrially from the oxidation of pure HMF in an oxygenated solvent. Another option could start from a HMF mixture issued from the dehydration of HFS. The main advantage is that HMF is not extracted from the reaction mixture and the solvent used for the dehydration is also used for the oxygenation step. However, this one-pot reaction is more complicated. In our case, our choice was to model the first case starting from pure HMF. The oxidation (50 °C; atmospheric pressure; 8 h, MnO<sub>2</sub> catalyst) was assumed to be realized in a batch reactor (dichloromethane : HMF weight ratio of 8 : 1), achieving a yield to DFF of 80%. The catalyst might be then filtered, regenerated and recycled. The solvent might be further recovered by distillation and recycled with a 99.9% yield. The separation of unreacted HMF would be performed by a precipitation step. After the reaction, the dissolved mixture would be cooled to precipitate DFF. The HMF is expected to remain soluble in the liquid phase. The recovered HMF might be dried for water removal and recycled.

The third step consists of an opening of the AM-THF molecular ring by reaction over a hydrodeoxygenation catalyst in the presence of a halogenated solvent. Such a reaction has been recently addressed by Rennovia patent. The patent claims the possibility of converting tetrahydrofuran 2,5-dicarboxylic acid (THFDCA) into linear adipic acid molecule with a yield of 99% over a Pd catalyst supported on silica beads. The reaction was realized at 160 C for 3 h under hydrogen iodide: THFDCA equimolar ratio. The reactor was pressurized with hydrogen until 48 atm. Here we have assumed that such reactions conditions and yield could be attained for the conversion of AM-THF into HMDA due to the very similar reaction mechanism. Finally, even if the Rennovia's patent does not tackle the separation step, we can reasonably propose that hydrogen iodide and H<sub>2</sub> gas could be recovered after reaction by reactor depressurization, recompression and recycling into reactor. A recovery rate of 99.9% was assumed for hydrogen iodide as base case. After the reaction, the crude HMDA would be purified in a distillation column, crystallized and dried.

### Solvents (First Pass)

| Preferred solvents                                                                         | water, EtOH, nBuOH, AcOipr, AcOnBu, PhOMe, MeOH, tBuOH, BnOH, ethylene glycol, acetone, MEK, MIBK, AcOEt, sulfolane                                                                     | List solvents below |
|--------------------------------------------------------------------------------------------|-----------------------------------------------------------------------------------------------------------------------------------------------------------------------------------------|---------------------|
| Problematic solvents: (acceptable only if substitution does not offer advantages)          | DMSO, cyclohexanone, DMPU, AcOH, Ac <sub>2</sub> O, Acetonitrile, AcOME, THF, heptane, Me-cyclohexane, toluene, xylene, MTBE, cyclohexane, chlorobenzene, formic acid, pyridine, Me-THF | MeOH                |
| Hazardous solvents: These solvents have significant health and/or safety concerns.         | dioxane, pentane, TEA, diisopropyl ether, DME, DCM, DMF, DMA, NMP, methoxyethanol, hexane                                                                                               |                     |
| Highly hazardous solvents: The solvents which are agreed not to be used, even in screening | Et <sub>2</sub> O, Benzene, CCl <sub>4</sub> , chloroform, DCE, nitromethane, CS <sub>2</sub> , HMPA                                                                                    |                     |

### Catalyst/enzyme (First Pass)

|                                                                                 |            | Tick |
|---------------------------------------------------------------------------------|------------|------|
| Catalyst or enzyme used, or reaction takes place without any catalyst/reagents. | Green Flag | x    |
| Use of stoichiometric quantities of reagents                                    | Amber Flag |      |
| Use of reagents in excess                                                       | Red Flag   |      |

|                                    |            | Tick |
|------------------------------------|------------|------|
| Facile recovery of catalyst/enzyme | Green Flag |      |
| catalyst/enzyme not recovered      | Amber Flag |      |

**Critical elements**

| Supply remaining | Flag colour | Note element |
|------------------|-------------|--------------|
| 5-50 years       | Red Flag    |              |
| 50-500 years     | Amber Flag  | Ni           |
| +500 years       | Green Flag  |              |

**Energy (First Pass)**

|                                              | Flag colour | Tick |
|----------------------------------------------|-------------|------|
| Reaction run between 0 to 70°C               | Green Flag  | x    |
| Reaction run between -20 to 0 or 70 to 140°C | Amber Flag  |      |
| Reaction run below -20 or above 140°C        | Red Flag    |      |

**Batch/flow**

|       | Flag colour | Tick |
|-------|-------------|------|
| Flow  | Green Flag  |      |
| Batch | Amber Flag  | x    |

|                                                          | Flag colour | Tick |
|----------------------------------------------------------|-------------|------|
| Reaction run at reflux                                   | Red Flag    |      |
| Reaction run 5°C or more below the solvent boiling point | Green Flag  | x    |

**Work Up**

|                                                                                                                                          | Flag colour | List |
|------------------------------------------------------------------------------------------------------------------------------------------|-------------|------|
| quenching<br>filtration<br>centrifugation<br>crystallisation                                                                             | Green Flag  | x    |
| Low temperature distillation/evaporation/<br>sublimation (< 140 °C at atmospheric<br>solvent exchange, quenching into aqueous<br>solvent | Amber Flag  |      |
| chromatography/ion exchange<br>high temperature<br>multiple recrystallisation                                                            | Red Flag    |      |

**Health & safety**

|                                   | Red Flag                     | Amber Flag                   | Green Flag                                                 | List substances and H-codes           | List substances and H-codes | List substances and H-codes |
|-----------------------------------|------------------------------|------------------------------|------------------------------------------------------------|---------------------------------------|-----------------------------|-----------------------------|
| <b>Highly explosive</b>           | H200, H201, H202, H203       | H205, H220, H224             | If no red or amber flagged H codes present then green flag | MeOH H225 - H301 + H311 + H331 - H370 | Hydrogen gas H220 - H280    |                             |
| <b>Explosive thermal runaway</b>  | H230, H240, H250             | H241                         |                                                            |                                       |                             |                             |
| <b>Toxic</b>                      | H300, H310, H330             | H301, H311, H331,            |                                                            |                                       |                             |                             |
| <b>Long Term toxicity</b>         | H340, H350, H360, H370, H372 | H341, H351, H361, H371, H373 |                                                            |                                       |                             |                             |
| <b>Environmental implications</b> | H400, H410, H411, H420       | H401, H412                   |                                                            |                                       |                             |                             |

**Use of chemicals of environmental concern**
**List substances of very high concern**

|                                                                                      |          |  |
|--------------------------------------------------------------------------------------|----------|--|
| Chemical identified as Substances of Very High Concern by ChemSec which are utilised | Red Flag |  |
|--------------------------------------------------------------------------------------|----------|--|



## Bio-based approach: Step D

Yield, AE, RME, MI/PMI and OE

| Reactant (Limiting Reactant First) | Mass (g)    | MW            | Mol     | Catalyst              | Mass (g)    | Reagent | Mass (g)    | Reaction solvent | Volume (cm <sup>3</sup> ) | Density (g ml <sup>-1</sup> ) | Mass (g)    | Work up chemical | Mass (g)    | Workup solvent | Volume (cm <sup>3</sup> ) | Density (g ml <sup>-1</sup> ) | Mass (g)    |
|------------------------------------|-------------|---------------|---------|-----------------------|-------------|---------|-------------|------------------|---------------------------|-------------------------------|-------------|------------------|-------------|----------------|---------------------------|-------------------------------|-------------|
| 2,5-diaminomethyltetrahydrofuran   | 0.140       | 130.19        | 0.0011  | Ni/diatomaceous earth | 0.050       |         |             | o-xylene         | 5.00                      | 0.88                          | 4.40        |                  |             |                |                           |                               | 0.00        |
| hydrogen gas                       | 0.037       | 2.02          | 0.01812 |                       |             |         |             |                  |                           |                               | 0.00        |                  |             |                |                           |                               | 0.00        |
|                                    |             |               |         |                       |             |         |             |                  |                           |                               | 0.00        |                  |             |                |                           |                               | 0.00        |
|                                    |             |               |         |                       |             |         |             |                  |                           |                               | 0.00        |                  |             |                |                           |                               | 0.00        |
|                                    |             |               |         |                       |             |         |             |                  |                           |                               | 0.00        |                  |             |                |                           |                               | 0.00        |
|                                    |             |               |         |                       |             |         |             |                  |                           |                               | 0.00        |                  |             |                |                           |                               | 0.00        |
| <b>Total</b>                       | <b>0.18</b> | <b>132.21</b> |         |                       | <b>0.05</b> |         | <b>0.00</b> |                  |                           |                               | <b>4.40</b> |                  | <b>0.00</b> |                |                           |                               | <b>0.00</b> |

|                                   | Step | Cumulative |
|-----------------------------------|------|------------|
| Yield                             | 94.0 | 78.9       |
| Conversion                        | 98.0 | /          |
| Selectivity                       | 95.9 | /          |
| AE                                | 87.9 | 77.9       |
| RME                               | 66.5 | 6.60       |
| PMI total                         | 39.3 | 875.55     |
| PMI Reaction                      | 39.3 | 367.11     |
| PMI reactants, reagents, catalyst | 1.9  | 118.33     |
| PMI reaction solvents             | 37.4 | 248.781    |
| PMI Workup                        | 0.0  | 508.439    |
| PMI Workup chemical               | 0.0  | 0.000      |
| PMI workup solvents               | 0.0  | 508.439    |

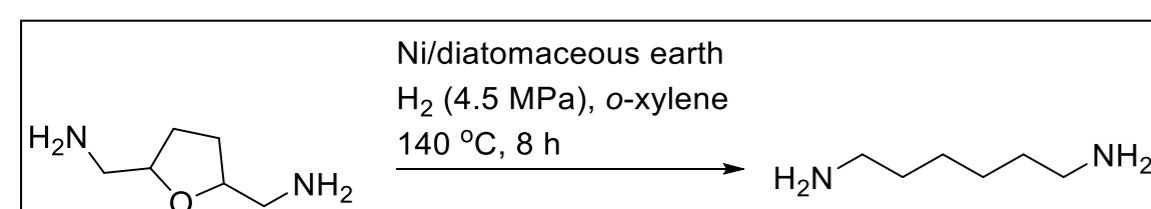

|                             | Mass  | MW     | Mol   |
|-----------------------------|-------|--------|-------|
| Product                     | 0.117 | 116.21 | 0.001 |
|                             | mass  |        |       |
| Unreacted limiting reactant | 0.003 |        |       |

### Experimental:

Xu, Jie; Xu, Yongming; Ma, Jiping; Jia, Xiuquan; Gao, Jin; Miao, Hong; Xia, Fei, Method for preparing aliphatic amine compound from furfurylamine compound by catalytic hydrogenolysis, From Faming Zhuanli Shenqing, 111100015, 05 May 2020.

Into a 10 mL reactor 0.14 g of 2,5-diaminomethyltetrahydrofuran, 0.05 g Ni/diatomaceous earth, 5 mL o-xylene were added; the reactor was filled with hydrogen to 4.5 MPa, under constant stirring. The reaction was carried out at 140 °C for 8.0 h. After the reaction was completed, it was cooled to room temperature. The reaction solution was centrifuged, and the supernatant was taken for gas chromatography analysis. The conversion rate of 2,5-diaminomethyltetrahydrofuran was 98%. The selectivity to 1,6-hexanediamine was 94%.

### Solvents (First Pass)

| Preferred solvents                                                                         | water, EtOH, nBuOH, AcOipr, AcOnBu, PhOMe, MeOH, tBuOH, BnOH, ethylene glycol, acetone, MEK, MIBK, AcOEt, sulfolane                                                        | List solvents below |
|--------------------------------------------------------------------------------------------|----------------------------------------------------------------------------------------------------------------------------------------------------------------------------|---------------------|
| Problematic solvents: (acceptable only if substitution does not offer advantages)          | DMSO, cyclohexanone, DMPU, AcOH, Ac2O, Acetonitrile, AcOMe, THF, heptane, Me-cyclohexane, toluene, xylene, MTBE, cyclohexane, chlorobenzene, formic acid, pyridine, Me-THF | o-Xylene            |
| Hazardous solvents: These solvents have significant health and/or safety concerns.         | dioxane, pentane, TEA, diisopropyl ether, DME, DCM, DMF, DMA, NMP, methoxyethanol, hexane                                                                                  |                     |
| Highly hazardous solvents: The solvents which are agreed not to be used, even in screening | Et <sub>2</sub> O, Benzene, CCl <sub>4</sub> , chloroform, DCE, nitromethane, CS <sub>2</sub> , HMPA                                                                       |                     |

### Catalyst/enzyme (First Pass)

|                                                                                 | Green Flag | Amber Flag | Red Flag | Tick |
|---------------------------------------------------------------------------------|------------|------------|----------|------|
| Catalyst or enzyme used, or reaction takes place without any catalyst/reagents. |            |            |          | x    |
| Use of stoichiometric quantities of reagents                                    |            |            |          |      |
| Use of reagents in excess                                                       |            |            |          |      |

|                                    | Green Flag | Amber Flag | Tick |
|------------------------------------|------------|------------|------|
| Facile recovery of catalyst/enzyme |            |            |      |
| catalyst/enzyme not recovered      |            |            |      |

**Critical elements**

| Supply remaining | Flag colour | Note element |
|------------------|-------------|--------------|
| 5-50 years       | Red Flag    |              |
| 50-500 years     | Amber Flag  | Ni           |
| +500 years       | Green Flag  |              |

**Energy (First Pass)**

|                                              |            | Tick |
|----------------------------------------------|------------|------|
| Reaction run between 0 to 70°C               | Green Flag |      |
| Reaction run between -20 to 0 or 70 to 140°C | Amber Flag | x    |
| Reaction run below -20 or above 140°C        | Red Flag   |      |

**Batch/flow**

|       |            | Tick |
|-------|------------|------|
| Flow  | Green Flag |      |
| Batch | Amber Flag | x    |

|                                                          |            | Tick |
|----------------------------------------------------------|------------|------|
| Reaction run at reflux                                   | Red Flag   |      |
| Reaction run 5°C or more below the solvent boiling point | Green Flag | X    |

**Work Up**

|                                                                                                                                          |            | List |
|------------------------------------------------------------------------------------------------------------------------------------------|------------|------|
| quenching<br>filtration<br>centrifugation<br>crystallisation                                                                             | Green Flag | x    |
| Low temperature distillation/evaporation/<br>sublimation (< 140 °C at atmospheric<br>solvent exchange, quenching into aqueous<br>solvent | Amber Flag |      |
| chromatography/ion exchange<br>high temperature<br>multiple recrystallisation                                                            | Red Flag   |      |

**Health & safety**

|                                   | Red Flag                     | Amber Flag                   | Green Flag                                                 | List substances and H-codes | List substances and H-codes | List substances and H-codes |
|-----------------------------------|------------------------------|------------------------------|------------------------------------------------------------|-----------------------------|-----------------------------|-----------------------------|
| <b>Highly explosive</b>           | H200, H201, H202, H203       | H205, H220, H224             | If no red or amber flagged H codes present then green flag |                             |                             |                             |
| <b>Explosive thermal runaway</b>  | H230, H240, H250             | H241                         |                                                            |                             |                             |                             |
| <b>Toxic</b>                      | H300, H310, H330             | H301, H311, H331,            |                                                            |                             |                             |                             |
| <b>Long Term toxicity</b>         | H340, H350, H360, H370, H372 | H341, H351, H361, H371, H373 |                                                            |                             |                             | Hydrogen gas H220 - H280    |
| <b>Environmental implications</b> | H400, H410, H411, H420       | H401, H412                   |                                                            |                             |                             |                             |

**Use of chemicals of environmental concern**

|                                                                                      |          | List substances of very high concern |
|--------------------------------------------------------------------------------------|----------|--------------------------------------|
| Chemical identified as Substances of Very High Concern by ChemSec which are utilised | Red Flag |                                      |
